# Supplementary material for: Newly Evolved Endogenous Retroviruses Prime the Ovarian Reserve for Activation
Source: Research Square preprint supplement (doi:10.21203/rs.3.rs-8081066/v1), 2025-12-03
Supplement: Supplementary file 1 [file 5b6350c0f12a747b68884936.xlsx]

## Sheet: Supplemental Data Set 1
Supplemental Data Set 1: List of 4,829 novel genes
gene_id	Chr	Start	End	Strand
MSTRG.75	chr1	4256482	4258667	+
MSTRG.120	chr1	6415960	6443787	+
MSTRG.122	chr1	6442402	6445478	-
MSTRG.124	chr1	6690856	6693799	+
MSTRG.90	chr1	7605436	7606921	-
MSTRG.164	chr1	10948275	10966443	+
MSTRG.156	chr1	11384075	11389948	-
MSTRG.163	chr1	13040754	13041134	-
MSTRG.191	chr1	13257180	13258286	-
MSTRG.184	chr1	13722165	13771331	+
MSTRG.199	chr1	15072868	15076931	+
MSTRG.198	chr1	15162267	15163904	+
MSTRG.201	chr1	15211193	15212758	-
MSTRG.205	chr1	15285407	15286781	-
MSTRG.211	chr1	16017123	16020092	+
MSTRG.220	chr1	16710322	16711285	-
MSTRG.225	chr1	16767248	16767673	-
MSTRG.231	chr1	16900036	16926688	+
MSTRG.232	chr1	16901453	16903112	-
MSTRG.229	chr1	18156139	18157836	-
MSTRG.239	chr1	18537910	18538372	+
MSTRG.238	chr1	18630066	18644906	-
MSTRG.249	chr1	19174313	19185294	-
MSTRG.255	chr1	20126625	20703495	+
MSTRG.257	chr1	20393247	20703965	+
MSTRG.272	chr1	21331776	21332008	+
MSTRG.273	chr1	22154277	22155519	-
MSTRG.274	chr1	22157623	22159411	-
MSTRG.281	chr1	23256940	23262858	+
MSTRG.282	chr1	23264313	23264739	+
MSTRG.298	chr1	24025579	24026265	+
MSTRG.301	chr1	26117739	26121842	+
MSTRG.302	chr1	28248173	28251363	-
MSTRG.305	chr1	29494230	29494853	-
MSTRG.339	chr1	30674175	30894564	-
MSTRG.340	chr1	30675800	30895199	+
MSTRG.337	chr1	30927119	30927324	-
MSTRG.352	chr1	31169534	31171326	-
MSTRG.356	chr1	31542578	31772040	-
MSTRG.362	chr1	31957278	31965115	-
MSTRG.366	chr1	32221176	32230427	-
MSTRG.354	chr1	33058910	33066102	-
MSTRG.421	chr1	34143943	34144915	+
MSTRG.382	chr1	34603009	34604934	-
MSTRG.386	chr1	34633824	34634249	+
MSTRG.390	chr1	35564530	35566026	-
MSTRG.391	chr1	35567093	35608435	-
MSTRG.392	chr1	35599782	35601406	-
MSTRG.394	chr1	35734952	35735189	-
MSTRG.395	chr1	35867100	35895819	-
MSTRG.452	chr1	36426762	36427202	-
MSTRG.453	chr1	36437181	36437505	-
MSTRG.457	chr1	37780359	37783877	+
MSTRG.485	chr1	37977590	37983737	-
MSTRG.496	chr1	38653221	38653849	+
MSTRG.465	chr1	39045592	39045856	-
MSTRG.468	chr1	39192912	39193119	-
MSTRG.499	chr1	40044203	40048603	-
MSTRG.504	chr1	40553073	40554459	-
MSTRG.508	chr1	40915195	40916920	-
MSTRG.524	chr1	41381306	41381870	-
MSTRG.526	chr1	42545810	42549576	-
MSTRG.537	chr1	43932239	43933890	-
MSTRG.549	chr1	45610828	45612162	+
MSTRG.582	chr1	46491228	46491684	+
MSTRG.558	chr1	47133960	47135470	+
MSTRG.559	chr1	47561730	47566548	-
MSTRG.560	chr1	48089263	48094306	+
MSTRG.561	chr1	48356473	49115362	+
MSTRG.567	chr1	48801564	48802096	+
MSTRG.572	chr1	49296208	49923787	+
MSTRG.593	chr1	51729898	51731809	+
MSTRG.588	chr1	52621573	52623251	-
MSTRG.619	chr1	54045250	54045507	+
MSTRG.627	chr1	54255763	54256024	+
MSTRG.631	chr1	55072929	55073279	+
MSTRG.644	chr1	55128568	55128804	+
MSTRG.654	chr1	57107850	57110729	-
MSTRG.659	chr1	57353146	57353386	-
MSTRG.683	chr1	58532132	58532421	-
MSTRG.719	chr1	60584412	60607033	+
MSTRG.718	chr1	60705200	60705706	+
MSTRG.725	chr1	61321768	61322015	+
MSTRG.733	chr1	61683920	61684201	+
MSTRG.736	chr1	61785796	61786100	+
MSTRG.756	chr1	63629224	63629805	-
MSTRG.750	chr1	64151422	64153186	-
MSTRG.789	chr1	65125496	65126028	-
MSTRG.804	chr1	65942742	65943127	-
MSTRG.814	chr1	66156054	66163432	+
MSTRG.833	chr1	67485035	67497074	+
MSTRG.837	chr1	67764735	67765900	-
MSTRG.848	chr1	70061640	70066379	-
MSTRG.850	chr1	70098938	70099892	+
MSTRG.851	chr1	70123130	70123361	+
MSTRG.875	chr1	72633970	72635661	+
MSTRG.896	chr1	74983012	74984718	+
MSTRG.932	chr1	75714555	75714970	-
MSTRG.941	chr1	76765516	76766181	+
MSTRG.959	chr1	79508621	79510324	-
MSTRG.969	chr1	79950830	79960147	-
MSTRG.979	chr1	80981218	80981820	+
MSTRG.984	chr1	82365358	82371858	-
MSTRG.999	chr1	84269054	84269357	+
MSTRG.1011	chr1	85001172	85001547	+
MSTRG.1017	chr1	85080208	85091163	+
MSTRG.1020	chr1	85111342	85272914	-
MSTRG.1023	chr1	85171174	85182599	-
MSTRG.1004	chr1	85454794	85455155	+
MSTRG.1005	chr1	85482763	85483245	+
MSTRG.1034	chr1	85598247	85598837	+
MSTRG.1101	chr1	88522004	88523721	-
MSTRG.1114	chr1	89452992	89463742	+
MSTRG.1117	chr1	89560593	89562298	-
MSTRG.1119	chr1	89579649	89581863	-
MSTRG.1123	chr1	90684581	90699148	+
MSTRG.1126	chr1	90886434	90891958	-
MSTRG.1132	chr1	91231319	91234356	-
MSTRG.1136	chr1	91238312	91241403	-
MSTRG.1148	chr1	91867686	91880486	+
MSTRG.1161	chr1	92190050	92191334	+
MSTRG.1149	chr1	92352373	92354280	+
MSTRG.1155	chr1	92705001	92706717	+
MSTRG.1176	chr1	93279806	93296861	-
MSTRG.1198	chr1	94365350	94365884	+
MSTRG.1211	chr1	95895093	95897403	+
MSTRG.1213	chr1	96115150	96128464	+
MSTRG.1215	chr1	97179066	97192900	+
MSTRG.1216	chr1	97179136	97192510	-
MSTRG.1217	chr1	97179417	97191823	-
MSTRG.1229	chr1	98820845	98823229	-
MSTRG.1231	chr1	99129538	99132242	+
MSTRG.1263	chr1	100647997	100860044	+
MSTRG.1251	chr1	101988241	102161863	-
MSTRG.1261	chr1	103205090	103212827	-
MSTRG.1265	chr1	104736933	104740188	+
MSTRG.1289	chr1	105507887	105508238	+
MSTRG.1277	chr1	105766082	105766518	+
MSTRG.1278	chr1	105867848	105935631	-
MSTRG.1294	chr1	108494067	108494417	+
MSTRG.1327	chr1	108852877	108988391	-
MSTRG.1308	chr1	109130094	109133399	-
MSTRG.1332	chr1	109543541	109543760	-
MSTRG.1323	chr1	111490985	111666535	+
MSTRG.1326	chr1	112619367	112627853	+
MSTRG.1319	chr1	113542256	113740824	+
MSTRG.1307	chr1	114112051	114114653	-
MSTRG.1324	chr1	114557364	114557921	+
MSTRG.1341	chr1	115395635	116225616	+
MSTRG.1372	chr1	119562131	119563757	+
MSTRG.1378	chr1	119766192	119766557	-
MSTRG.1382	chr1	119810803	119812908	-
MSTRG.1384	chr1	119819484	119819931	-
MSTRG.1397	chr1	120506692	120508603	+
MSTRG.1398	chr1	120509693	120510129	+
MSTRG.1399	chr1	120517567	120518464	+
MSTRG.1425	chr1	124355381	124355593	-
MSTRG.1428	chr1	124584019	124613241	+
MSTRG.1432	chr1	125000436	125000901	-
MSTRG.1401	chr1	125655980	125782902	-
MSTRG.1402	chr1	125656500	125783340	-
MSTRG.1413	chr1	126627527	126630071	-
MSTRG.1471	chr1	131564240	131564591	-
MSTRG.1473	chr1	131633151	131633407	+
MSTRG.1526	chr1	132268263	132277699	+
MSTRG.1536	chr1	132545463	132547443	+
MSTRG.1581	chr1	134649805	134651706	-
MSTRG.1593	chr1	135242383	135251716	-
MSTRG.1601	chr1	135934438	135937251	+
MSTRG.1608	chr1	136018249	136018892	-
MSTRG.1609	chr1	136375699	136401221	+
MSTRG.1621	chr1	136625848	136641461	-
MSTRG.1636	chr1	138609961	138611923	+
MSTRG.1631	chr1	138773999	138777182	-
MSTRG.1637	chr1	138805203	138808160	-
MSTRG.1658	chr1	140047781	140048257	-
MSTRG.1659	chr1	140794958	140797220	-
MSTRG.1663	chr1	142360415	142589368	-
MSTRG.1667	chr1	143555669	143598640	+
MSTRG.1670	chr1	143664835	143665156	-
MSTRG.1674	chr1	143719751	143720122	+
MSTRG.1680	chr1	144252679	144253800	+
MSTRG.1681	chr1	144255456	144255702	+
MSTRG.1679	chr1	145528159	145531203	+
MSTRG.1678	chr1	145535704	145537296	+
MSTRG.1695	chr1	146724995	146725280	+
MSTRG.1683	chr1	147372692	147377888	+
MSTRG.1684	chr1	147559254	147561036	-
MSTRG.1686	chr1	148447655	148761858	-
MSTRG.1689	chr1	149154088	149179843	-
MSTRG.1699	chr1	149636130	149638890	-
MSTRG.1700	chr1	150188087	150188297	-
MSTRG.1701	chr1	150270656	150271853	+
MSTRG.1702	chr1	151220186	151223686	-
MSTRG.1710	chr1	151741584	151741792	+
MSTRG.1719	chr1	152088758	152088974	-
MSTRG.1721	chr1	152314085	152315789	+
MSTRG.1738	chr1	152902817	152904594	+
MSTRG.1740	chr1	153216790	153218586	+
MSTRG.1745	chr1	153403276	153403572	-
MSTRG.1750	chr1	153469813	153470459	-
MSTRG.1751	chr1	153481420	153481671	-
MSTRG.1764	chr1	153908620	153912639	-
MSTRG.1758	chr1	154095952	154096290	+
MSTRG.1771	chr1	155660615	155660848	+
MSTRG.1796	chr1	156722706	156723109	-
MSTRG.1819	chr1	158839408	158839743	+
MSTRG.1839	chr1	160936540	160936761	+
MSTRG.1872	chr1	161039485	161040254	-
MSTRG.1904	chr1	162643168	162646780	-
MSTRG.1906	chr1	162657381	162672694	+
MSTRG.1901	chr1	164554071	164572247	-
MSTRG.1913	chr1	164656602	164659662	-
MSTRG.1902	chr1	164973839	165000735	-
MSTRG.1910	chr1	166357199	166359294	+
MSTRG.1945	chr1	166438052	166455507	-
MSTRG.1930	chr1	166953820	166957167	+
MSTRG.1941	chr1	167557682	167559020	+
MSTRG.1950	chr1	167954868	167967160	-
MSTRG.1974	chr1	170886196	170887389	+
MSTRG.1975	chr1	170888349	170888957	+
MSTRG.1970	chr1	171010649	171010868	-
MSTRG.1989	chr1	171292274	171296915	+
MSTRG.1993	chr1	171505891	171506169	-
MSTRG.2000	chr1	171879948	171880214	-
MSTRG.2025	chr1	172145438	172145844	+
MSTRG.2036	chr1	172206839	172207199	+
MSTRG.2039	chr1	172529396	172532316	-
MSTRG.2051	chr1	175139708	175139985	+
MSTRG.2052	chr1	175141183	175141451	+
MSTRG.2064	chr1	176709283	176717802	-
MSTRG.2089	chr1	177260400	177286848	-
MSTRG.2065	chr1	177585840	177588362	+
MSTRG.2066	chr1	177758110	177762025	+
MSTRG.2101	chr1	177984130	178196393	+
MSTRG.2107	chr1	178300065	178300403	+
MSTRG.2123	chr1	178514220	178518222	+
MSTRG.2116	chr1	179058429	179058639	-
MSTRG.2117	chr1	179194338	179194676	-
MSTRG.2118	chr1	179228595	179228827	-
MSTRG.2119	chr1	179381654	179382622	-
MSTRG.2121	chr1	179397132	179397402	-
MSTRG.2122	chr1	179459341	179464793	-
MSTRG.2127	chr1	179610307	179661595	-
MSTRG.2134	chr1	180700604	180700820	+
MSTRG.2154	chr1	181214689	181214961	+
MSTRG.2174	chr1	182020101	182029824	+
MSTRG.2163	chr1	182241743	182272258	+
MSTRG.2178	chr1	183073270	183074167	+
MSTRG.2189	chr1	183103606	183104146	-
MSTRG.2190	chr1	183158993	184025551	-
MSTRG.2201	chr1	183555051	183558644	-
MSTRG.2180	chr1	184462139	184462475	-
MSTRG.2209	chr1	185518192	185519277	+
MSTRG.2210	chr1	185549624	185557217	-
MSTRG.2211	chr1	185558319	185628644	+
MSTRG.2213	chr1	186538018	186539514	+
MSTRG.2252	chr1	188625163	188645459	-
MSTRG.2253	chr1	188645461	188645957	-
MSTRG.2256	chr1	188988264	188989335	-
MSTRG.2247	chr1	189012478	189016254	-
MSTRG.2248	chr1	189070097	189070309	+
MSTRG.2259	chr1	189239746	189241557	+
MSTRG.2273	chr1	189923617	189932549	+
MSTRG.2280	chr1	190766994	190767491	-
MSTRG.2286	chr1	191127370	191131381	-
MSTRG.2288	chr1	191146932	191148648	+
MSTRG.2299	chr1	191388912	191389338	+
MSTRG.2301	chr1	191653667	191657014	+
MSTRG.2311	chr1	191870446	191906290	-
MSTRG.2312	chr1	191871551	191871775	-
MSTRG.2324	chr1	192145268	192164110	-
MSTRG.2326	chr1	192366110	192366811	+
MSTRG.2341	chr1	193604615	193604865	+
MSTRG.2344	chr1	194656337	194656606	-
MSTRG.2351	chr10	3239585	3240009	+
MSTRG.2354	chr10	3337391	3337751	-
MSTRG.2357	chr10	3463760	3704631	-
MSTRG.2359	chr10	3584446	3586383	-
MSTRG.2379	chr10	5928073	6017552	+
MSTRG.2380	chr10	6356278	6364083	+
MSTRG.2385	chr10	7388770	7389053	-
MSTRG.2399	chr10	7679162	7679439	+
MSTRG.2401	chr10	8151184	8152917	-
MSTRG.2449	chr10	10161082	10161368	+
MSTRG.2438	chr10	10478516	10483589	+
MSTRG.2519	chr10	15063880	15064549	+
MSTRG.2496	chr10	15107714	15110499	-
MSTRG.2521	chr10	16924640	16927822	-
MSTRG.2506	chr10	17408395	17503699	+
MSTRG.2504	chr10	17813777	17854344	-
MSTRG.2523	chr10	17948242	17949940	+
MSTRG.2561	chr10	21754018	21757722	+
MSTRG.2568	chr10	22054982	22058663	-
MSTRG.2574	chr10	22149747	22151808	-
MSTRG.2582	chr10	23657803	23658627	+
MSTRG.2583	chr10	23658454	23661721	-
MSTRG.2584	chr10	23830525	23832147	-
MSTRG.2587	chr10	24170054	24171946	-
MSTRG.2590	chr10	25043108	25050057	-
MSTRG.2593	chr10	25340481	25340991	+
MSTRG.2609	chr10	26556316	26565792	-
MSTRG.2615	chr10	26796307	26796517	-
MSTRG.2602	chr10	26929284	26935091	-
MSTRG.2620	chr10	27810384	27810793	-
MSTRG.2616	chr10	27825648	27826071	-
MSTRG.2623	chr10	29030756	29031254	+
MSTRG.2632	chr10	29797262	29801180	+
MSTRG.2633	chr10	30017560	30026934	+
MSTRG.2672	chr10	31641779	31657177	-
MSTRG.2681	chr10	31714964	31717946	+
MSTRG.2686	chr10	32309532	32338546	+
MSTRG.2667	chr10	33707957	33709776	-
MSTRG.2697	chr10	34289104	34289505	-
MSTRG.2694	chr10	35175181	35207275	-
MSTRG.2708	chr10	37193497	37196415	-
MSTRG.2709	chr10	37397554	37397968	-
MSTRG.2713	chr10	37700860	37701092	-
MSTRG.2714	chr10	37800029	37801656	+
MSTRG.2715	chr10	38899607	38901487	-
MSTRG.2718	chr10	39225178	39229876	+
MSTRG.2726	chr10	40185634	40204165	+
MSTRG.2743	chr10	40362716	40363067	+
MSTRG.2744	chr10	40363399	40363651	+
MSTRG.2745	chr10	40423755	40423981	+
MSTRG.2747	chr10	41149631	41186825	-
MSTRG.2760	chr10	41531419	41531628	+
MSTRG.2769	chr10	41812014	41812225	+
MSTRG.2775	chr10	42276867	42279070	+
MSTRG.2788	chr10	43239145	43239453	+
MSTRG.2798	chr10	43773203	43773902	-
MSTRG.2811	chr10	43960318	43960655	+
MSTRG.2813	chr10	44005830	44031519	+
MSTRG.2804	chr10	44222256	44228563	+
MSTRG.2801	chr10	44228901	44229157	-
MSTRG.2822	chr10	45277647	45277927	-
MSTRG.2833	chr10	45625996	45628451	+
MSTRG.2839	chr10	45980648	45982640	-
MSTRG.2826	chr10	46983136	46986066	-
MSTRG.2828	chr10	48944892	48947912	+
MSTRG.2852	chr10	49712195	49714041	+
MSTRG.2856	chr10	49853994	50335160	+
MSTRG.2862	chr10	50278548	50281990	-
MSTRG.2844	chr10	51787417	51789157	+
MSTRG.2909	chr10	55079955	55082739	+
MSTRG.2911	chr10	55382660	56277229	-
MSTRG.2963	chr10	61513735	61515140	-
MSTRG.2971	chr10	61706158	61709864	-
MSTRG.2982	chr10	62025872	62062500	-
MSTRG.2986	chr10	62452639	62453399	-
MSTRG.2993	chr10	62508141	62510475	+
MSTRG.2998	chr10	62731780	62732882	-
MSTRG.3025	chr10	63852939	63853352	+
MSTRG.3028	chr10	64088874	64089826	+
MSTRG.3018	chr10	65065313	65079660	+
MSTRG.3020	chr10	65261704	65263202	-
MSTRG.3022	chr10	65476096	65476906	+
MSTRG.3023	chr10	65477281	65477764	+
MSTRG.3031	chr10	65955336	65955741	-
MSTRG.3036	chr10	66969708	66977724	-
MSTRG.3037	chr10	66974809	66978205	+
MSTRG.3047	chr10	67100895	67101592	+
MSTRG.3039	chr10	67451640	67452027	-
MSTRG.3043	chr10	67925784	67927144	-
MSTRG.3058	chr10	68411751	68412808	+
MSTRG.3063	chr10	69356669	69357035	+
MSTRG.3100	chr10	69605256	69611613	+
MSTRG.3102	chr10	70060143	70088136	+
MSTRG.3064	chr10	71223901	71224152	-
MSTRG.3085	chr10	71452303	71461972	+
MSTRG.3088	chr10	71571280	71573612	-
MSTRG.3084	chr10	72297171	72297375	+
MSTRG.3083	chr10	72311163	72311563	+
MSTRG.3114	chr10	73101080	73106307	+
MSTRG.3115	chr10	73109999	73110286	+
MSTRG.3117	chr10	73121794	73122318	+
MSTRG.3118	chr10	73139579	73140945	+
MSTRG.3119	chr10	73155060	73155607	+
MSTRG.3124	chr10	73307285	73307536	+
MSTRG.3127	chr10	73491179	73492148	+
MSTRG.3128	chr10	73639711	73708207	-
MSTRG.3131	chr10	74621380	74705189	-
MSTRG.3104	chr10	74926346	74927034	-
MSTRG.3110	chr10	75067876	75068622	+
MSTRG.3140	chr10	75380489	75380978	+
MSTRG.3152	chr10	75764546	75764748	+
MSTRG.3150	chr10	76085215	76085727	+
MSTRG.3134	chr10	76180697	76201565	-
MSTRG.3180	chr10	77033501	77033706	+
MSTRG.3199	chr10	77729721	77730221	-
MSTRG.3246	chr10	79196906	79258931	-
MSTRG.3248	chr10	79257747	79257988	-
MSTRG.3267	chr10	79849701	79850472	-
MSTRG.3271	chr10	79861279	79861582	+
MSTRG.3265	chr10	79894150	79894856	+
MSTRG.3279	chr10	79987724	79988054	+
MSTRG.3305	chr10	80400291	80402381	+
MSTRG.3308	chr10	80466506	80467008	+
MSTRG.3366	chr10	81687418	81697626	+
MSTRG.3383	chr10	81799718	81959286	-
MSTRG.3384	chr10	81801603	81961279	-
MSTRG.3395	chr10	81988618	81989708	+
MSTRG.3404	chr10	82457432	82518540	+
MSTRG.3408	chr10	82599351	82601813	-
MSTRG.3413	chr10	82898623	82899016	-
MSTRG.3415	chr10	83357079	83357644	+
MSTRG.3445	chr10	85002763	85003208	+
MSTRG.3443	chr10	85088135	85088845	+
MSTRG.3468	chr10	86913516	86914682	+
MSTRG.3480	chr10	87406080	87406585	+
MSTRG.3485	chr10	87775156	87777457	+
MSTRG.3491	chr10	88049974	88051670	+
MSTRG.3492	chr10	88076398	88076988	-
MSTRG.3494	chr10	88088762	88090167	-
MSTRG.3507	chr10	88867605	88869352	+
MSTRG.3512	chr10	89663319	89664018	-
MSTRG.3513	chr10	89665752	89665992	-
MSTRG.3514	chr10	89683077	89683958	-
MSTRG.3518	chr10	89762427	89762678	+
MSTRG.3529	chr10	90287635	90288993	-
MSTRG.3530	chr10	90439815	90471133	-
MSTRG.3533	chr10	90612397	90612636	+
MSTRG.3545	chr10	93377438	93379370	-
MSTRG.3548	chr10	93401370	93558818	-
MSTRG.3547	chr10	93785771	93785985	+
MSTRG.3576	chr10	94746074	94746407	+
MSTRG.3582	chr10	95311615	95311843	-
MSTRG.3584	chr10	95315099	95315364	-
MSTRG.3597	chr10	95801427	95801962	+
MSTRG.3600	chr10	96077563	96077764	-
MSTRG.3598	chr10	96157432	96157826	-
MSTRG.3601	chr10	96160686	96160919	-
MSTRG.3627	chr10	98119990	98952903	-
MSTRG.3611	chr10	99725430	99726489	+
MSTRG.3626	chr10	100038857	100040389	-
MSTRG.3621	chr10	100128329	100160783	+
MSTRG.3641	chr10	102325140	102325382	-
MSTRG.3666	chr10	105733563	105734742	-
MSTRG.3671	chr10	105817038	105820599	-
MSTRG.3667	chr10	106391089	106391563	+
MSTRG.3686	chr10	107101542	107103840	+
MSTRG.3690	chr10	107432102	107446818	-
MSTRG.3699	chr10	110667151	110668896	-
MSTRG.3698	chr10	110726752	110728906	-
MSTRG.3717	chr10	111050545	111052076	-
MSTRG.3749	chr10	112053704	112054497	+
MSTRG.3759	chr10	112473792	112614932	-
MSTRG.3740	chr10	113573793	113576497	+
MSTRG.3741	chr10	113574740	113576018	+
MSTRG.3743	chr10	114172297	114173487	+
MSTRG.3769	chr10	116336295	116337957	-
MSTRG.3771	chr10	116762363	116764026	+
MSTRG.3785	chr10	117226593	117227949	+
MSTRG.3789	chr10	117593825	117600199	-
MSTRG.3793	chr10	117738146	117739357	-
MSTRG.3802	chr10	118152608	118153116	+
MSTRG.3803	chr10	118153534	118153951	+
MSTRG.3800	chr10	118232629	118233325	+
MSTRG.3808	chr10	118246275	118252416	+
MSTRG.3812	chr10	118266360	118266836	-
MSTRG.3805	chr10	118365791	118368004	-
MSTRG.3837	chr10	119415655	119415897	+
MSTRG.3843	chr10	119514417	119515172	+
MSTRG.3844	chr10	119522185	119523439	+
MSTRG.3846	chr10	119554824	119555469	+
MSTRG.3824	chr10	120260863	120320198	+
MSTRG.3828	chr10	120333970	120334177	+
MSTRG.3860	chr10	120970088	120970720	-
MSTRG.3872	chr10	121368691	121368960	+
MSTRG.3857	chr10	121405939	121407568	-
MSTRG.3877	chr10	121638629	121642701	-
MSTRG.3879	chr10	121701902	121702218	+
MSTRG.3881	chr10	121756226	121759767	+
MSTRG.3882	chr10	121771549	121774325	+
MSTRG.3891	chr10	122581205	122583873	-
MSTRG.3892	chr10	122620429	122671492	-
MSTRG.3887	chr10	122959507	122960537	-
MSTRG.3888	chr10	122961601	122962928	+
MSTRG.3889	chr10	122963302	122965571	-
MSTRG.3918	chr10	123612137	123612369	+
MSTRG.3899	chr10	124310674	125022672	+
MSTRG.3900	chr10	124413054	124414814	+
MSTRG.3912	chr10	125153435	125163683	+
MSTRG.3921	chr10	126933973	126934326	+
MSTRG.3954	chr10	127371502	127372080	+
MSTRG.3961	chr10	127525331	127532854	+
MSTRG.3972	chr10	128050162	128050474	+
MSTRG.4032	chr10	128854212	128855886	-
MSTRG.4098	chr11	3159464	3159962	+
MSTRG.4073	chr11	3334019	3335445	-
MSTRG.4108	chr11	3958527	3960196	+
MSTRG.4109	chr11	3960513	3960774	+
MSTRG.4111	chr11	3980034	3980385	+
MSTRG.4092	chr11	3995777	4004152	-
MSTRG.4101	chr11	4049816	4051919	+
MSTRG.4129	chr11	4865138	4865391	-
MSTRG.4138	chr11	5179948	5184262	-
MSTRG.4139	chr11	5185511	5186074	-
MSTRG.4148	chr11	5409202	5409615	-
MSTRG.4149	chr11	5427193	5433106	-
MSTRG.4173	chr11	6254301	6254944	+
MSTRG.4169	chr11	6287579	6288778	-
MSTRG.4184	chr11	6954302	6956031	-
MSTRG.4187	chr11	7182189	7182418	-
MSTRG.4190	chr11	7392048	7585250	+
MSTRG.4194	chr11	7791787	7792055	+
MSTRG.4191	chr11	7979890	7985486	+
MSTRG.4192	chr11	8338064	8339590	-
MSTRG.4195	chr11	8807454	8808156	-
MSTRG.4196	chr11	8808495	8810020	-
MSTRG.4201	chr11	8837049	8843190	-
MSTRG.4203	chr11	8913050	8913965	+
MSTRG.4205	chr11	9773101	9774417	+
MSTRG.4206	chr11	10198443	10200667	+
MSTRG.4207	chr11	10389859	10391597	-
MSTRG.4204	chr11	10543110	10543498	+
MSTRG.4210	chr11	11123889	11126603	-
MSTRG.4214	chr11	11287478	11288805	+
MSTRG.4228	chr11	12041052	12056724	-
MSTRG.4236	chr11	14444068	14444272	-
MSTRG.4226	chr11	15980440	15983057	-
MSTRG.4257	chr11	19881806	19883338	+
MSTRG.4268	chr11	20283005	20293258	-
MSTRG.4272	chr11	20584879	20585362	+
MSTRG.4273	chr11	20600259	20600502	+
MSTRG.4276	chr11	20927122	20935780	+
MSTRG.4297	chr11	22826587	22826968	+
MSTRG.4294	chr11	23003839	23004108	-
MSTRG.4319	chr11	23519533	23536413	+
MSTRG.4335	chr11	25061918	25063637	+
MSTRG.4348	chr11	25610712	25611212	-
MSTRG.4349	chr11	25612039	25612501	-
MSTRG.4339	chr11	27189611	27255554	+
MSTRG.4360	chr11	28337432	28338408	-
MSTRG.4359	chr11	28729319	28745162	-
MSTRG.4381	chr11	30761147	30766898	+
MSTRG.4382	chr11	30767203	30767821	+
MSTRG.4392	chr11	31343972	31345422	-
MSTRG.4400	chr11	32163612	32180681	-
MSTRG.4411	chr11	32987340	32993857	+
MSTRG.4417	chr11	33330971	33331245	-
MSTRG.4419	chr11	33397397	33397846	-
MSTRG.4420	chr11	33405037	33405278	-
MSTRG.4438	chr11	35351038	35352145	-
MSTRG.4444	chr11	35997872	36001861	+
MSTRG.4442	chr11	37361864	37362331	-
MSTRG.4455	chr11	40270821	40359681	-
MSTRG.4452	chr11	40571723	40589886	-
MSTRG.4456	chr11	40650595	40653426	-
MSTRG.4461	chr11	41087959	41091382	-
MSTRG.4463	chr11	41142801	41143425	+
MSTRG.4462	chr11	41463208	41467315	+
MSTRG.4465	chr11	42770682	42793248	-
MSTRG.4466	chr11	43057665	43059082	+
MSTRG.4470	chr11	43237587	43239213	-
MSTRG.4476	chr11	44017081	44017300	-
MSTRG.4489	chr11	45651871	45815261	+
MSTRG.4498	chr11	46412379	46415005	-
MSTRG.4499	chr11	46413373	46414536	-
MSTRG.4504	chr11	46798555	46804995	-
MSTRG.4510	chr11	46971082	46972390	-
MSTRG.4511	chr11	46975499	46975699	-
MSTRG.4516	chr11	48669549	48670930	+
MSTRG.4537	chr11	49857324	49857573	+
MSTRG.4543	chr11	50134318	50138635	+
MSTRG.4552	chr11	50349434	50351054	+
MSTRG.4571	chr11	51587291	51589045	-
MSTRG.4569	chr11	51666300	51669352	-
MSTRG.4602	chr11	52501957	52541696	+
MSTRG.4594	chr11	52554941	52582368	+
MSTRG.4595	chr11	52681846	52684058	-
MSTRG.4597	chr11	52868664	52870327	+
MSTRG.4598	chr11	52879967	52882625	+
MSTRG.4605	chr11	53438595	53439120	-
MSTRG.4611	chr11	53637198	53647550	-
MSTRG.4615	chr11	53752981	53757295	+
MSTRG.4616	chr11	53754573	53754781	+
MSTRG.4631	chr11	54196308	54196580	+
MSTRG.4633	chr11	54223679	54223927	+
MSTRG.4625	chr11	54522385	54522644	-
MSTRG.4662	chr11	57384905	57388035	-
MSTRG.4672	chr11	57812851	57814881	+
MSTRG.4674	chr11	58015128	58023701	+
MSTRG.4690	chr11	58519304	58521324	+
MSTRG.4696	chr11	58957375	58957996	+
MSTRG.4709	chr11	59124162	59124916	+
MSTRG.4710	chr11	59635877	59640171	-
MSTRG.4745	chr11	60534736	60537869	-
MSTRG.4767	chr11	61183498	61184387	+
MSTRG.4792	chr11	62515477	62516058	+
MSTRG.4799	chr11	62582473	62598567	-
MSTRG.4794	chr11	62602435	62602671	-
MSTRG.4823	chr11	67161907	67164126	+
MSTRG.4842	chr11	67896317	67896685	-
MSTRG.4935	chr11	70326620	70327273	+
MSTRG.4925	chr11	70371705	70371976	-
MSTRG.4926	chr11	70376088	70389507	-
MSTRG.4941	chr11	70633904	70635107	-
MSTRG.4942	chr11	70635423	70639767	-
MSTRG.4940	chr11	70643300	70643711	+
MSTRG.4950	chr11	70655243	70655591	-
MSTRG.4963	chr11	70902104	70910980	+
MSTRG.4970	chr11	71265913	71267681	+
MSTRG.4980	chr11	72172089	72172386	-
MSTRG.4985	chr11	72578971	72607051	-
MSTRG.4999	chr11	72815066	72815313	+
MSTRG.5007	chr11	73437155	73439007	+
MSTRG.5006	chr11	73560849	73563124	-
MSTRG.5074	chr11	77102179	77103568	+
MSTRG.5081	chr11	77235978	77236273	+
MSTRG.5083	chr11	77299642	77320649	-
MSTRG.5102	chr11	78157804	78158011	+
MSTRG.5139	chr11	78748149	78754067	+
MSTRG.5153	chr11	79741667	79745646	-
MSTRG.5155	chr11	79872894	79873494	+
MSTRG.5173	chr11	80348851	80349281	+
MSTRG.5176	chr11	80424000	80424340	-
MSTRG.5184	chr11	81504895	81507549	-
MSTRG.5195	chr11	82875360	82876167	-
MSTRG.5259	chr11	85673940	85674680	+
MSTRG.5274	chr11	86757663	86758882	+
MSTRG.5272	chr11	86772678	86775483	+
MSTRG.5275	chr11	86822961	86824016	+
MSTRG.5281	chr11	87074358	87074604	+
MSTRG.5294	chr11	87349878	87350403	-
MSTRG.5308	chr11	87629250	87629458	+
MSTRG.5312	chr11	87992088	88007137	+
MSTRG.5316	chr11	88161963	88176356	-
MSTRG.5339	chr11	90830952	90834474	-
MSTRG.5341	chr11	91047536	91167847	+
MSTRG.5344	chr11	92824131	92825714	-
MSTRG.5356	chr11	94004731	94005371	+
MSTRG.5360	chr11	94300790	94301059	-
MSTRG.5371	chr11	94960223	94963536	+
MSTRG.5399	chr11	95778628	95779049	-
MSTRG.5400	chr11	95780080	95782658	-
MSTRG.5394	chr11	95932067	95932282	-
MSTRG.5409	chr11	96198862	96199079	-
MSTRG.5410	chr11	96243677	96245245	+
MSTRG.5412	chr11	96386991	96395087	-
MSTRG.5422	chr11	96890289	96892755	-
MSTRG.5436	chr11	97188244	97189281	+
MSTRG.5464	chr11	98067601	98073956	+
MSTRG.5465	chr11	98069944	98070156	-
MSTRG.5518	chr11	100458716	100459642	-
MSTRG.5559	chr11	101398808	101399152	-
MSTRG.5578	chr11	101767765	101768935	+
MSTRG.5594	chr11	102318325	102318606	+
MSTRG.5603	chr11	102523397	102523656	-
MSTRG.5604	chr11	102531477	102532337	-
MSTRG.5605	chr11	102532828	102533408	-
MSTRG.5608	chr11	102560163	102561505	+
MSTRG.5632	chr11	103480450	103484528	+
MSTRG.5629	chr11	103668079	103669828	+
MSTRG.5641	chr11	103938379	103940594	+
MSTRG.5657	chr11	105589252	105589505	-
MSTRG.5664	chr11	105956017	105956450	+
MSTRG.5668	chr11	106029478	106033133	-
MSTRG.5669	chr11	106031648	106032614	-
MSTRG.5717	chr11	108226344	108226578	-
MSTRG.5718	chr11	108312489	108312787	-
MSTRG.5721	chr11	108403859	108404080	-
MSTRG.5733	chr11	108718680	108720222	+
MSTRG.5728	chr11	109312100	109314116	+
MSTRG.5749	chr11	110335498	110335922	-
MSTRG.5751	chr11	110514561	110523015	+
MSTRG.5755	chr11	112825639	112835643	-
MSTRG.5761	chr11	113626547	113626769	-
MSTRG.5764	chr11	113670021	113672161	-
MSTRG.5767	chr11	114212636	114218142	-
MSTRG.5771	chr11	114383310	114384493	-
MSTRG.5772	chr11	114399250	114399523	-
MSTRG.5773	chr11	114408685	114409150	-
MSTRG.5776	chr11	114453783	114454068	+
MSTRG.5788	chr11	114635086	114635458	-
MSTRG.5789	chr11	114660367	114663379	+
MSTRG.5815	chr11	115534656	115536299	+
MSTRG.5819	chr11	115732018	115732360	-
MSTRG.5856	chr11	116389573	116393339	+
MSTRG.5857	chr11	116390692	116391226	+
MSTRG.5858	chr11	116394112	116394430	+
MSTRG.5865	chr11	116704474	116705152	-
MSTRG.5866	chr11	116724682	116725195	-
MSTRG.5878	chr11	117182332	117183235	-
MSTRG.5885	chr11	117654208	117654464	-
MSTRG.5888	chr11	117894635	117895342	-
MSTRG.5889	chr11	117895712	117900451	-
MSTRG.5904	chr11	119150825	119151201	+
MSTRG.5916	chr11	119320214	119321351	-
MSTRG.5920	chr11	119565848	119576055	+
MSTRG.5954	chr11	120460880	120461149	+
MSTRG.5961	chr11	120573462	120574045	+
MSTRG.5969	chr11	120633826	120635118	+
MSTRG.5975	chr11	120767157	120767477	-
MSTRG.6008	chr11	121476740	121477166	-
MSTRG.6004	chr11	121904824	121925363	-
MSTRG.6005	chr11	121925518	121935230	+
MSTRG.6038	chr12	3715863	3717138	-
MSTRG.6035	chr12	3997665	3998647	+
MSTRG.6053	chr12	5052509	5054247	-
MSTRG.6056	chr12	5343706	5344333	+
MSTRG.6090	chr12	6633286	6639968	+
MSTRG.6072	chr12	8207886	8208108	-
MSTRG.6088	chr12	8620041	8620258	-
MSTRG.6094	chr12	9786889	9789904	+
MSTRG.6098	chr12	10158821	10159123	+
MSTRG.6099	chr12	10159538	10159753	+
MSTRG.6109	chr12	10485634	10545993	-
MSTRG.6102	chr12	10998330	11104231	-
MSTRG.6106	chr12	11660185	11667064	+
MSTRG.6119	chr12	12310648	12310865	+
MSTRG.6120	chr12	12333113	12333333	-
MSTRG.6112	chr12	12650927	12667055	-
MSTRG.6125	chr12	13705120	13709138	+
MSTRG.6146	chr12	15083782	15085404	-
MSTRG.6149	chr12	16316496	16320030	+
MSTRG.6156	chr12	17207188	17212962	-
MSTRG.6177	chr12	17343995	17344243	-
MSTRG.6165	chr12	17430983	17431344	+
MSTRG.6186	chr12	17930528	17966500	+
MSTRG.6174	chr12	18145034	18150495	+
MSTRG.6171	chr12	18353070	18354623	-
MSTRG.6193	chr12	20588747	20589686	+
MSTRG.6198	chr12	20733095	20967548	+
MSTRG.6202	chr12	20897023	20897295	-
MSTRG.6260	chr12	21268552	21269125	-
MSTRG.6267	chr12	21883309	21899273	-
MSTRG.6271	chr12	22271233	22773552	-
MSTRG.6312	chr12	24635929	24636428	-
MSTRG.6320	chr12	25086457	25087999	+
MSTRG.6322	chr12	25099126	25101326	+
MSTRG.6345	chr12	28757624	28759401	+
MSTRG.6342	chr12	29392289	29400501	-
MSTRG.6358	chr12	29572403	29575483	+
MSTRG.6359	chr12	29609789	29611257	+
MSTRG.6353	chr12	31217107	31217520	+
MSTRG.6371	chr12	31256327	31261243	+
MSTRG.6387	chr12	32158310	32164293	-
MSTRG.6386	chr12	32846276	32875294	-
MSTRG.6396	chr12	33764103	33780893	-
MSTRG.6406	chr12	34496187	34520994	+
MSTRG.6408	chr12	34792909	34793146	-
MSTRG.6409	chr12	34815227	34816568	-
MSTRG.6431	chr12	35067148	35067409	+
MSTRG.6432	chr12	35069794	35070278	+
MSTRG.6433	chr12	35071051	35072224	+
MSTRG.6434	chr12	35113566	35114056	+
MSTRG.6415	chr12	35154230	35154518	+
MSTRG.6416	chr12	35194237	35206901	+
MSTRG.6418	chr12	35207249	35211729	+
MSTRG.6419	chr12	35218865	35225417	+
MSTRG.6420	chr12	35225741	35233218	+
MSTRG.6421	chr12	35233649	35240587	+
MSTRG.6422	chr12	35241052	35241457	+
MSTRG.6423	chr12	35270516	35270757	+
MSTRG.6425	chr12	35318590	35319048	+
MSTRG.6412	chr12	35743460	35745238	+
MSTRG.6413	chr12	35743670	35744494	+
MSTRG.6438	chr12	36089319	36090290	+
MSTRG.6458	chr12	36679124	37370384	-
MSTRG.6445	chr12	39722159	39738213	-
MSTRG.6476	chr12	39985632	39990999	+
MSTRG.6490	chr12	41145098	41147642	+
MSTRG.6491	chr12	41178791	41179111	+
MSTRG.6492	chr12	41201058	41202965	+
MSTRG.6493	chr12	41209386	41210074	+
MSTRG.6494	chr12	41295810	41296126	+
MSTRG.6495	chr12	41322518	41322742	+
MSTRG.6497	chr12	41344232	41344623	+
MSTRG.6502	chr12	41405441	41405682	+
MSTRG.6484	chr12	42103103	42104017	+
MSTRG.6485	chr12	42871913	42873005	+
MSTRG.6487	chr12	43989089	43989334	+
MSTRG.6519	chr12	44775160	44823540	+
MSTRG.6523	chr12	45913746	45914462	+
MSTRG.6525	chr12	46620971	46624511	-
MSTRG.6535	chr12	47983734	48043799	+
MSTRG.6538	chr12	48164174	48165844	-
MSTRG.6539	chr12	48406700	48408309	-
MSTRG.6546	chr12	50649117	50666587	+
MSTRG.6557	chr12	51830706	51830935	+
MSTRG.6567	chr12	53257091	53257433	+
MSTRG.6568	chr12	53257879	53258302	+
MSTRG.6569	chr12	53279993	53280288	+
MSTRG.6571	chr12	53549208	53549453	+
MSTRG.6572	chr12	53586748	53587004	+
MSTRG.6573	chr12	54025156	54078793	-
MSTRG.6587	chr12	54669483	54669716	+
MSTRG.6586	chr12	54710508	54710875	+
MSTRG.6591	chr12	55020438	55022426	+
MSTRG.6626	chr12	57276068	57276468	+
MSTRG.6644	chr12	58292589	58295404	+
MSTRG.6642	chr12	58680662	58681226	-
MSTRG.6630	chr12	59039069	59039401	-
MSTRG.6653	chr12	63361496	63367030	+
MSTRG.6657	chr12	64391843	64396287	-
MSTRG.6658	chr12	64464202	64680393	+
MSTRG.6672	chr12	65047127	65047610	+
MSTRG.6668	chr12	65507092	65508785	-
MSTRG.6669	chr12	66192319	66192795	-
MSTRG.6679	chr12	67397679	67521638	+
MSTRG.6689	chr12	67681189	67685941	+
MSTRG.6707	chr12	69374272	69375117	+
MSTRG.6708	chr12	69375564	69375833	+
MSTRG.6711	chr12	69576748	69577046	-
MSTRG.6764	chr12	72777014	72777232	+
MSTRG.6797	chr12	75784152	75786565	-
MSTRG.6809	chr12	76869883	76875944	-
MSTRG.6810	chr12	77145605	77146341	-
MSTRG.6812	chr12	77802601	77803632	+
MSTRG.6824	chr12	78672819	78674279	-
MSTRG.6826	chr12	78931833	78944802	+
MSTRG.6832	chr12	79198845	79201344	+
MSTRG.6850	chr12	80304276	80305812	-
MSTRG.6863	chr12	80356383	80358326	+
MSTRG.6898	chr12	82359290	82361090	-
MSTRG.6896	chr12	82491639	82491961	-
MSTRG.6895	chr12	82565344	82565899	-
MSTRG.6900	chr12	82667211	82668435	+
MSTRG.6901	chr12	82682090	82682579	+
MSTRG.6902	chr12	82700738	82702311	+
MSTRG.6903	chr12	82768634	82769239	+
MSTRG.6906	chr12	82896038	82900259	-
MSTRG.6907	chr12	82911548	82911784	+
MSTRG.6914	chr12	83289050	83290789	-
MSTRG.6956	chr12	85076905	85077123	+
MSTRG.6960	chr12	85096814	85097183	+
MSTRG.7049	chr12	88493524	88495237	+
MSTRG.7070	chr12	89799215	89803424	+
MSTRG.7056	chr12	90677121	90722253	-
MSTRG.7077	chr12	91076609	91079350	-
MSTRG.7083	chr12	91473342	91474236	-
MSTRG.7072	chr12	91595986	91597578	+
MSTRG.7088	chr12	96110324	96112004	+
MSTRG.7089	chr12	96137557	96863734	-
MSTRG.7117	chr12	99258504	99259415	-
MSTRG.7136	chr12	99821289	99821499	-
MSTRG.7139	chr12	99834592	99834936	-
MSTRG.7140	chr12	99850392	99851130	-
MSTRG.7143	chr12	99960695	99966479	-
MSTRG.7154	chr12	100093477	100094123	-
MSTRG.7129	chr12	100393784	100393990	-
MSTRG.7132	chr12	100487332	100488293	-
MSTRG.7160	chr12	100967122	100967737	+
MSTRG.7180	chr12	102316002	102317609	-
MSTRG.7206	chr12	103471946	103476856	+
MSTRG.7228	chr12	105136321	105137914	+
MSTRG.7230	chr12	105148972	105149222	-
MSTRG.7234	chr12	105392424	105393300	+
MSTRG.7259	chr12	108682416	108683082	-
MSTRG.7267	chr12	108918183	108919687	-
MSTRG.7271	chr12	109757182	109816585	+
MSTRG.7273	chr12	109932190	109934780	-
MSTRG.7276	chr12	110282466	110282718	-
MSTRG.7278	chr12	110383296	110393775	-
MSTRG.7288	chr12	110744754	110747877	+
MSTRG.7352	chr12	113166210	113166810	-
MSTRG.7350	chr12	113297657	113298961	-
MSTRG.7356	chr12	113665984	113667668	-
MSTRG.7368	chr12	114167895	114168280	+
MSTRG.7366	chr12	114179563	114190237	+
MSTRG.7369	chr12	114330803	114331259	-
MSTRG.7405	chr12	116547054	116547471	-
MSTRG.7407	chr12	116816071	116837564	-
MSTRG.7416	chr12	118217172	118217410	+
MSTRG.7417	chr12	118357484	118357810	+
MSTRG.7420	chr12	118594681	118595221	+
MSTRG.7429	chr12	119754075	119801970	+
MSTRG.7432	chr13	3101044	3103612	-
MSTRG.7445	chr13	3361389	3361683	+
MSTRG.7454	chr13	3871864	3881896	+
MSTRG.7450	chr13	4075126	4076021	-
MSTRG.7494	chr13	9230134	9233902	+
MSTRG.7529	chr13	10682473	10728747	-
MSTRG.7514	chr13	12530610	12532181	+
MSTRG.7555	chr13	13231483	13232160	-
MSTRG.7540	chr13	13539729	13545016	+
MSTRG.7548	chr13	13742880	13745621	-
MSTRG.7568	chr13	14214168	14214636	-
MSTRG.7571	chr13	14400030	14402094	+
MSTRG.7588	chr13	14771530	14783432	-
MSTRG.7589	chr13	14780762	14781954	-
MSTRG.7590	chr13	14852219	14857597	+
MSTRG.7595	chr13	15274882	15277354	+
MSTRG.7600	chr13	15833471	15836275	+
MSTRG.7601	chr13	15836809	15838718	+
MSTRG.7602	chr13	15900326	15902490	+
MSTRG.7603	chr13	15902760	15904279	+
MSTRG.7638	chr13	19809596	19812149	+
MSTRG.7699	chr13	23638709	23679067	-
MSTRG.7750	chr13	24553195	24553896	-
MSTRG.7745	chr13	24769994	24771677	-
MSTRG.7748	chr13	24773148	24775473	+
MSTRG.7757	chr13	25152445	25152705	+
MSTRG.7759	chr13	25656976	25657196	+
MSTRG.7768	chr13	28199017	28216031	-
MSTRG.7777	chr13	28879365	28879605	-
MSTRG.7786	chr13	29280230	29288604	+
MSTRG.7787	chr13	29313820	29314113	-
MSTRG.7781	chr13	29974800	29974999	-
MSTRG.7804	chr13	30327372	31088343	-
MSTRG.7808	chr13	30516337	30517898	+
MSTRG.7793	chr13	31594079	31597051	+
MSTRG.7795	chr13	32450310	32455077	+
MSTRG.7835	chr13	34333552	34333860	-
MSTRG.7841	chr13	34877503	34877887	+
MSTRG.7843	chr13	35279913	35280167	-
MSTRG.7879	chr13	37722693	37732913	+
MSTRG.7884	chr13	38208739	38209468	+
MSTRG.7898	chr13	39506709	39513660	-
MSTRG.7916	chr13	41271339	41271658	+
MSTRG.7920	chr13	41617260	41617534	+
MSTRG.7941	chr13	43069836	43080448	-
MSTRG.7945	chr13	43244842	43247730	-
MSTRG.7946	chr13	43304698	43312127	+
MSTRG.7968	chr13	44221104	44232615	-
MSTRG.7952	chr13	44711574	44714370	-
MSTRG.7979	chr13	44728384	44729887	-
MSTRG.7978	chr13	45157611	45157995	-
MSTRG.7983	chr13	46316702	46318391	+
MSTRG.7992	chr13	46450279	46472112	-
MSTRG.8005	chr13	47004408	47005022	-
MSTRG.8010	chr13	47022498	47023224	+
MSTRG.8018	chr13	47165867	47172318	-
MSTRG.8025	chr13	48439574	48442432	-
MSTRG.8026	chr13	48468949	48474789	+
MSTRG.8038	chr13	48968060	48969806	+
MSTRG.8043	chr13	49394260	49400282	-
MSTRG.8063	chr13	51098238	51100625	-
MSTRG.8062	chr13	51157255	51158256	+
MSTRG.8067	chr13	51203291	51204021	+
MSTRG.8104	chr13	51667521	51668294	-
MSTRG.8114	chr13	53135592	53137201	+
MSTRG.8115	chr13	53228443	53229581	+
MSTRG.8119	chr13	53790376	53791535	-
MSTRG.8120	chr13	54035620	54038428	-
MSTRG.8133	chr13	54544702	54546435	-
MSTRG.8139	chr13	54825302	54827084	-
MSTRG.8159	chr13	55335978	55351555	+
MSTRG.8165	chr13	55545974	55547696	+
MSTRG.8190	chr13	56672182	56672768	+
MSTRG.8194	chr13	57019397	57034867	-
MSTRG.8200	chr13	57119410	57120607	+
MSTRG.8205	chr13	57783119	57791078	+
MSTRG.8195	chr13	57939237	57945635	-
MSTRG.8212	chr13	58274297	58276832	+
MSTRG.8222	chr13	58583798	58585746	-
MSTRG.8219	chr13	58795848	58796534	-
MSTRG.8226	chr13	59968424	59975183	+
MSTRG.8227	chr13	60130310	60132574	+
MSTRG.8260	chr13	61996902	62013238	+
MSTRG.8247	chr13	62418875	62419764	+
MSTRG.8253	chr13	62543563	62618460	-
MSTRG.8280	chr13	63615241	63615463	+
MSTRG.8305	chr13	63854355	63854587	+
MSTRG.8307	chr13	63863817	63864925	+
MSTRG.8321	chr13	65240508	65241356	-
MSTRG.8329	chr13	65322030	65324624	-
MSTRG.8334	chr13	65336556	65337372	-
MSTRG.8339	chr13	65381282	65388247	-
MSTRG.8342	chr13	65398793	65415209	-
MSTRG.8361	chr13	65503942	65512406	+
MSTRG.8363	chr13	65513615	65513963	+
MSTRG.8367	chr13	65545572	65802616	-
MSTRG.8371	chr13	65590280	65591017	+
MSTRG.8380	chr13	65804882	65805281	-
MSTRG.8393	chr13	66009176	66009462	+
MSTRG.8435	chr13	66589120	66596376	+
MSTRG.8460	chr13	67995018	67998684	+
MSTRG.8473	chr13	69338111	69338349	-
MSTRG.8482	chr13	69637012	69637217	+
MSTRG.8484	chr13	69693173	69695151	+
MSTRG.8495	chr13	70010905	70401898	-
MSTRG.8487	chr13	70547603	70550831	+
MSTRG.8506	chr13	71104734	71105210	+
MSTRG.8547	chr13	74575733	74577984	-
MSTRG.8552	chr13	74705828	74706292	+
MSTRG.8549	chr13	75484410	75505682	+
MSTRG.8581	chr13	78728758	78729006	-
MSTRG.8583	chr13	79615146	79627944	-
MSTRG.8601	chr13	80882817	80883196	-
MSTRG.8611	chr13	82178653	82179030	-
MSTRG.8636	chr13	85213837	85214151	+
MSTRG.8627	chr13	86921703	86925048	-
MSTRG.8630	chr13	87328943	87330958	-
MSTRG.8626	chr13	87859548	87859822	-
MSTRG.8632	chr13	87989909	88345820	-
MSTRG.8634	chr13	88344588	88345982	+
MSTRG.8650	chr13	89499271	89504259	-
MSTRG.8643	chr13	91109336	91109945	-
MSTRG.8644	chr13	91132618	91133666	-
MSTRG.8645	chr13	91141686	91141980	-
MSTRG.8670	chr13	92378802	92379040	+
MSTRG.8674	chr13	92484097	92486076	+
MSTRG.8702	chr13	94247855	94248124	-
MSTRG.8717	chr13	95176709	95180553	+
MSTRG.8737	chr13	96626488	96628087	-
MSTRG.8738	chr13	96691414	96693900	-
MSTRG.8744	chr13	96706000	96706305	-
MSTRG.8742	chr13	97849632	97849900	+
MSTRG.8762	chr13	98171388	98178454	+
MSTRG.8768	chr13	98245148	98245435	+
MSTRG.8756	chr13	98418717	98420104	+
MSTRG.8771	chr13	99355191	99356141	+
MSTRG.8780	chr13	99566458	99616243	+
MSTRG.8804	chr13	101340585	101343945	+
MSTRG.8802	chr13	101581640	101584432	-
MSTRG.8808	chr13	102435539	102436672	-
MSTRG.8813	chr13	103411525	103411759	+
MSTRG.8815	chr13	103558788	103576545	-
MSTRG.8822	chr13	103774691	103782230	+
MSTRG.8829	chr13	105123097	105123641	-
MSTRG.8828	chr13	105490833	105492973	-
MSTRG.8844	chr13	106280884	106281260	-
MSTRG.8846	chr13	106321136	106359781	-
MSTRG.8900	chr13	112986277	112987381	-
MSTRG.8907	chr13	113307926	113310592	-
MSTRG.8908	chr13	113511758	113515026	+
MSTRG.8947	chr14	6555890	6556892	-
MSTRG.8952	chr14	8152434	8152776	+
MSTRG.8953	chr14	8861045	8891041	+
MSTRG.8954	chr14	9018260	9020495	+
MSTRG.8961	chr14	9132510	9381456	+
MSTRG.8962	chr14	9174016	9229330	+
MSTRG.8972	chr14	10269449	10269846	-
MSTRG.8960	chr14	11232634	11234296	+
MSTRG.8987	chr14	13320823	13322903	+
MSTRG.8990	chr14	14553031	14560211	-
MSTRG.8999	chr14	14731321	14731593	+
MSTRG.9000	chr14	15460941	15462539	-
MSTRG.8996	chr14	16077782	16088460	-
MSTRG.8997	chr14	16085737	16086012	-
MSTRG.9012	chr14	16626751	16630372	-
MSTRG.8995	chr14	16939023	16940756	+
MSTRG.9022	chr14	17073117	17366866	-
MSTRG.9025	chr14	17137350	17998720	-
MSTRG.9037	chr14	18692138	18694184	-
MSTRG.9003	chr14	19272156	19398766	+
MSTRG.9004	chr14	19272506	19399090	+
MSTRG.9001	chr14	19664877	19665145	-
MSTRG.9041	chr14	20023889	20025558	-
MSTRG.9030	chr14	20278477	20280091	+
MSTRG.9065	chr14	20814343	20815360	-
MSTRG.9076	chr14	21884122	21884333	+
MSTRG.9074	chr14	21987679	21988422	+
MSTRG.9087	chr14	22972179	22973910	-
MSTRG.9088	chr14	22975503	22976029	-
MSTRG.9089	chr14	22989614	22991370	-
MSTRG.9100	chr14	24386229	24386476	+
MSTRG.9129	chr14	24557082	24560481	+
MSTRG.9118	chr14	25428328	25430248	+
MSTRG.9127	chr14	25706727	25707135	+
MSTRG.9136	chr14	26014293	26154059	+
MSTRG.9154	chr14	26916726	26939621	-
MSTRG.9157	chr14	26966002	26966217	-
MSTRG.9165	chr14	27040984	27049250	+
MSTRG.9169	chr14	27417202	27417412	-
MSTRG.9174	chr14	27678679	27678958	+
MSTRG.9182	chr14	29001466	29345526	+
MSTRG.9191	chr14	29628549	29628753	-
MSTRG.9196	chr14	30698036	30700108	+
MSTRG.9200	chr14	30950897	30951322	-
MSTRG.9237	chr14	31799420	31803417	-
MSTRG.9239	chr14	31809499	31812444	-
MSTRG.9263	chr14	33667911	33669903	+
MSTRG.9280	chr14	34639926	34873495	+
MSTRG.9285	chr14	34700725	34709831	+
MSTRG.9271	chr14	35964361	35966188	-
MSTRG.9276	chr14	37458805	37709006	-
MSTRG.9277	chr14	37458830	37709502	+
MSTRG.9294	chr14	38692099	38694488	-
MSTRG.9301	chr14	42236394	42240883	+
MSTRG.9306	chr14	42404828	42407407	-
MSTRG.9307	chr14	42405340	42406740	-
MSTRG.9339	chr14	45260952	45261164	+
MSTRG.9343	chr14	45386120	45386410	-
MSTRG.9353	chr14	45640782	45754585	-
MSTRG.9359	chr14	45862745	45864290	-
MSTRG.9360	chr14	45863987	46047897	+
MSTRG.9364	chr14	46019547	46019816	-
MSTRG.9375	chr14	47177137	47177348	+
MSTRG.9393	chr14	47596761	47599035	-
MSTRG.9405	chr14	47952171	47953359	-
MSTRG.9409	chr14	47965734	47970398	-
MSTRG.9410	chr14	47980692	47982478	+
MSTRG.9477	chr14	49054720	49054970	-
MSTRG.9474	chr14	49577055	49579514	-
MSTRG.9445	chr14	50913864	50916734	+
MSTRG.9419	chr14	50978179	50978435	-
MSTRG.9443	chr14	51089507	51089766	+
MSTRG.9423	chr14	51149734	51150313	-
MSTRG.9441	chr14	51827016	51827287	+
MSTRG.9472	chr14	51865780	51884866	-
MSTRG.9486	chr14	52735274	52736958	-
MSTRG.9564	chr14	53172404	53172702	-
MSTRG.9493	chr14	53591570	53592032	+
MSTRG.9495	chr14	53718043	53718492	+
MSTRG.9581	chr14	54763300	54764489	-
MSTRG.9589	chr14	54826210	54827165	+
MSTRG.9626	chr14	55821377	55821660	+
MSTRG.9629	chr14	56223038	56224523	+
MSTRG.9641	chr14	56750984	56751239	-
MSTRG.9644	chr14	56835216	56864554	+
MSTRG.9651	chr14	57154346	57154701	-
MSTRG.9662	chr14	57492166	57502519	-
MSTRG.9657	chr14	57522255	57525624	-
MSTRG.9675	chr14	58000312	58000549	+
MSTRG.9681	chr14	58189137	58217387	+
MSTRG.9684	chr14	58371992	58373314	+
MSTRG.9676	chr14	58625003	58626165	+
MSTRG.9708	chr14	59777710	59782417	+
MSTRG.9699	chr14	60960284	60961864	+
MSTRG.9701	chr14	61032244	61032589	+
MSTRG.9721	chr14	61833820	61837784	+
MSTRG.9759	chr14	63522109	63522333	-
MSTRG.9763	chr14	63850136	63852136	-
MSTRG.9809	chr14	66204882	66206471	+
MSTRG.9788	chr14	66981953	66982180	-
MSTRG.9792	chr14	67491824	67492057	+
MSTRG.9825	chr14	68810542	68812965	+
MSTRG.9831	chr14	69733314	69746732	+
MSTRG.9853	chr14	71445113	71445354	-
MSTRG.9856	chr14	72097583	72401973	-
MSTRG.9857	chr14	72122920	72123410	+
MSTRG.9860	chr14	72251454	72270256	+
MSTRG.9865	chr14	73028403	73028793	-
MSTRG.9892	chr14	75012493	75014225	-
MSTRG.9903	chr14	75347475	75348204	+
MSTRG.9913	chr14	76364717	76366188	-
MSTRG.9914	chr14	76366553	76370354	-
MSTRG.9930	chr14	77234227	77236873	+
MSTRG.9936	chr14	77539880	77540811	+
MSTRG.9939	chr14	77715193	77716461	-
MSTRG.9940	chr14	77732106	77732411	-
MSTRG.9941	chr14	77738239	77738667	-
MSTRG.9928	chr14	78134426	78140568	-
MSTRG.9952	chr14	79399575	79415441	-
MSTRG.9965	chr14	80312478	80312785	+
MSTRG.9971	chr14	80463069	80471271	-
MSTRG.9972	chr14	82487790	82498061	-
MSTRG.9981	chr14	87143614	87143910	+
MSTRG.9977	chr14	87416047	87416320	-
MSTRG.9987	chr14	88647465	88650274	-
MSTRG.9998	chr14	91746450	91748018	-
MSTRG.10003	chr14	95284739	95285070	-
MSTRG.10005	chr14	95661700	95663527	+
MSTRG.10013	chr14	95828326	95830337	+
MSTRG.10019	chr14	97514991	97515319	+
MSTRG.10017	chr14	97708116	97708419	+
MSTRG.10024	chr14	99349852	99351316	+
MSTRG.10039	chr14	101995240	102002374	+
MSTRG.10042	chr14	102813794	102815420	-
MSTRG.10055	chr14	103346924	103360389	+
MSTRG.10050	chr14	104012618	104014258	-
MSTRG.10074	chr14	105177383	105181111	+
MSTRG.10065	chr14	106895965	107589457	-
MSTRG.10066	chr14	107278977	107279384	+
MSTRG.10089	chr14	108169795	108173411	+
MSTRG.10091	chr14	108269864	108303259	-
MSTRG.10082	chr14	109055132	109055632	+
MSTRG.10106	chr14	110300618	110311629	+
MSTRG.10117	chr14	111874165	111876058	+
MSTRG.10104	chr14	112287894	112289194	+
MSTRG.10058	chr14	112661614	112663105	-
MSTRG.10080	chr14	113538655	113540313	-
MSTRG.10083	chr14	113629311	113631001	-
MSTRG.10064	chr14	113754451	113754762	-
MSTRG.10101	chr14	114093636	114095673	-
MSTRG.10102	chr14	114095937	114106944	-
MSTRG.10097	chr14	114935273	114939720	-
MSTRG.10069	chr14	115041728	115042341	-
MSTRG.10070	chr14	115042378	115042696	+
MSTRG.10072	chr14	115042962	115043170	+
MSTRG.10088	chr14	116074398	116077083	-
MSTRG.10115	chr14	118124127	118126077	-
MSTRG.10116	chr14	118126394	118126674	-
MSTRG.10123	chr14	118684006	118685194	+
MSTRG.10124	chr14	118982041	118982253	-
MSTRG.10130	chr14	120487861	120492966	-
MSTRG.10136	chr14	120796320	120798583	-
MSTRG.10142	chr14	120955820	120956438	-
MSTRG.10139	chr14	120963271	120963574	+
MSTRG.10144	chr14	121066771	121069376	-
MSTRG.10174	chr14	122983478	122983841	+
MSTRG.10188	chr14	123349454	123351064	+
MSTRG.10166	chr14	123628748	123631084	-
MSTRG.10180	chr14	124211017	124226856	+
MSTRG.10211	chr15	5156132	5156529	+
MSTRG.10216	chr15	5219443	5219734	-
MSTRG.10217	chr15	5219848	5220229	+
MSTRG.10218	chr15	5224652	5225454	+
MSTRG.10207	chr15	5880044	5881337	-
MSTRG.10208	chr15	6085265	6086844	-
MSTRG.10209	chr15	6226927	6228152	+
MSTRG.10223	chr15	7053541	7147502	-
MSTRG.10227	chr15	7685104	7759145	-
MSTRG.10230	chr15	8071340	8073298	+
MSTRG.10251	chr15	8690375	8690703	+
MSTRG.10233	chr15	8735806	8737509	+
MSTRG.10241	chr15	9325219	9326108	-
MSTRG.10244	chr15	9544575	9546734	+
MSTRG.10267	chr15	11997268	12043904	+
MSTRG.10276	chr15	12501082	12502533	+
MSTRG.10277	chr15	12502003	12503974	-
MSTRG.10284	chr15	13790086	14418082	+
MSTRG.10282	chr15	14489031	14607161	+
MSTRG.10297	chr15	15054054	15936145	-
MSTRG.10300	chr15	15490457	15492031	+
MSTRG.10306	chr15	16857892	16869970	-
MSTRG.10308	chr15	17960359	18554608	-
MSTRG.10322	chr15	19452509	19453682	+
MSTRG.10307	chr15	19514712	19516844	-
MSTRG.10317	chr15	19684693	19684948	+
MSTRG.10323	chr15	19753141	20144394	+
MSTRG.10325	chr15	19857443	19864071	-
MSTRG.10337	chr15	21318347	21320011	+
MSTRG.10328	chr15	22147802	22155699	+
MSTRG.10341	chr15	22615449	22623568	-
MSTRG.10347	chr15	24299643	24305645	+
MSTRG.10358	chr15	25982225	25982661	+
MSTRG.10375	chr15	29201642	29955494	-
MSTRG.10376	chr15	29469711	29470294	-
MSTRG.10391	chr15	31756183	31756901	+
MSTRG.10407	chr15	31879289	31947066	+
MSTRG.10411	chr15	33942347	33943585	+
MSTRG.10428	chr15	34462773	34463021	+
MSTRG.10418	chr15	34476815	34478879	+
MSTRG.10433	chr15	34833842	34898658	-
MSTRG.10436	chr15	34932907	34933129	-
MSTRG.10437	chr15	35132621	35133230	-
MSTRG.10460	chr15	36797218	36801877	+
MSTRG.10465	chr15	36858668	36860799	-
MSTRG.10478	chr15	37367489	37367766	+
MSTRG.10482	chr15	37476584	37505452	-
MSTRG.10468	chr15	37862106	37862370	-
MSTRG.10492	chr15	38300729	38300987	+
MSTRG.10504	chr15	39173254	39173504	+
MSTRG.10512	chr15	40261671	40282996	+
MSTRG.10518	chr15	43368368	43368572	-
MSTRG.10523	chr15	43971880	43972347	+
MSTRG.10527	chr15	44018739	44020038	-
MSTRG.10528	chr15	44040862	44042372	-
MSTRG.10534	chr15	45196703	45196909	-
MSTRG.10543	chr15	46342541	46357308	-
MSTRG.10544	chr15	46355977	47030878	-
MSTRG.10545	chr15	46356008	47031167	+
MSTRG.10554	chr15	47213920	47215104	-
MSTRG.10541	chr15	50527890	50529747	+
MSTRG.10573	chr15	53672325	53677387	+
MSTRG.10567	chr15	53976624	53978484	-
MSTRG.10587	chr15	55561804	55562312	+
MSTRG.10588	chr15	55563720	55563966	+
MSTRG.10599	chr15	56410807	56435511	+
MSTRG.10598	chr15	56874093	56876586	+
MSTRG.10602	chr15	56947399	56988231	-
MSTRG.10609	chr15	58142045	58142359	+
MSTRG.10618	chr15	58909020	58909359	+
MSTRG.10619	chr15	58911685	58912122	+
MSTRG.10624	chr15	59800696	59801232	+
MSTRG.10625	chr15	60302834	60306506	-
MSTRG.10627	chr15	60579478	60594760	-
MSTRG.10642	chr15	62858064	62859692	+
MSTRG.10646	chr15	64610570	64634664	+
MSTRG.10650	chr15	64818847	64820536	+
MSTRG.10651	chr15	65729118	65730723	-
MSTRG.10666	chr15	66216637	66220013	+
MSTRG.10670	chr15	69162685	69164565	-
MSTRG.10674	chr15	70024529	70112671	-
MSTRG.10693	chr15	72157920	72158608	+
MSTRG.10695	chr15	72208464	72208800	+
MSTRG.10696	chr15	72228636	72228842	+
MSTRG.10715	chr15	73186193	73219256	+
MSTRG.10733	chr15	74093431	74093640	+
MSTRG.10752	chr15	75881291	75882562	-
MSTRG.10780	chr15	76368348	76370592	-
MSTRG.10803	chr15	76739328	76739639	-
MSTRG.10805	chr15	76796129	76796349	-
MSTRG.10807	chr15	76818304	76822026	+
MSTRG.10812	chr15	76901336	76903538	-
MSTRG.10817	chr15	77350564	77606857	-
MSTRG.10839	chr15	77869018	77870998	+
MSTRG.10876	chr15	79188698	79189055	-
MSTRG.10891	chr15	79597841	79598113	-
MSTRG.10896	chr15	79666364	79669668	-
MSTRG.10899	chr15	79708252	79710605	-
MSTRG.10907	chr15	80053210	80063162	-
MSTRG.10942	chr15	81183382	81186691	-
MSTRG.10933	chr15	81479160	81479764	-
MSTRG.10935	chr15	81485762	81485971	-
MSTRG.10975	chr15	81818686	81818919	+
MSTRG.10966	chr15	82013169	82013747	-
MSTRG.10978	chr15	82315156	82316420	-
MSTRG.10989	chr15	82528626	82529937	-
MSTRG.11006	chr15	83203086	83206051	+
MSTRG.11011	chr15	83458444	83462549	-
MSTRG.11012	chr15	83470649	83472241	-
MSTRG.11028	chr15	84187273	84189643	+
MSTRG.11055	chr15	86204213	86214384	-
MSTRG.11060	chr15	87864302	87865957	+
MSTRG.11059	chr15	88475821	88513003	-
MSTRG.11064	chr15	88872356	88872700	-
MSTRG.11085	chr15	89324749	89334667	-
MSTRG.11099	chr15	89765961	89766983	+
MSTRG.11102	chr15	89767978	89768886	+
MSTRG.11108	chr15	91570526	91570739	-
MSTRG.11112	chr15	91721094	91722397	-
MSTRG.11114	chr15	91947922	91948154	-
MSTRG.11120	chr15	92351603	92352044	+
MSTRG.11121	chr15	92370945	92371294	+
MSTRG.11122	chr15	92373741	92373946	+
MSTRG.11126	chr15	92807070	92809772	-
MSTRG.11127	chr15	92814817	92815799	-
MSTRG.11136	chr15	93109235	93109472	+
MSTRG.11137	chr15	93112733	93114370	-
MSTRG.11141	chr15	93678781	93678980	-
MSTRG.11147	chr15	94508281	94508538	-
MSTRG.11153	chr15	95753368	95763259	+
MSTRG.11154	chr15	95763410	95765076	+
MSTRG.11168	chr15	96182588	96202818	+
MSTRG.11169	chr15	96218127	96222293	+
MSTRG.11171	chr15	96260483	96260707	-
MSTRG.11173	chr15	96286206	96287138	-
MSTRG.11176	chr15	96461196	96463569	+
MSTRG.11181	chr15	97160015	97160279	-
MSTRG.11195	chr15	98242350	98244065	-
MSTRG.11201	chr15	98534378	98534695	+
MSTRG.11210	chr15	98685959	98686446	-
MSTRG.11246	chr15	99373726	99376548	+
MSTRG.11251	chr15	99698444	99700019	-
MSTRG.11272	chr15	99872199	99872873	+
MSTRG.11255	chr15	99891982	99892336	-
MSTRG.11289	chr15	100494423	100494688	-
MSTRG.11312	chr15	100921316	100922408	-
MSTRG.11309	chr15	101270990	101271456	+
MSTRG.11327	chr15	102283243	102284360	+
MSTRG.11355	chr15	102548772	102551303	+
MSTRG.11340	chr15	102729481	102736366	+
MSTRG.11341	chr15	102736516	102737577	+
MSTRG.11343	chr15	102852977	102870377	-
MSTRG.11344	chr15	102855017	102855578	+
MSTRG.11366	chr15	103385570	103385853	-
MSTRG.11368	chr15	103406848	103408497	+
MSTRG.11364	chr15	103619029	103619922	-
MSTRG.11357	chr15	103752677	103897037	+
MSTRG.11358	chr15	103754720	103898943	+
MSTRG.11374	chr16	3250717	3469764	+
MSTRG.11382	chr16	3471113	3519292	-
MSTRG.11399	chr16	4277829	4287635	+
MSTRG.11407	chr16	4464563	4464781	-
MSTRG.11408	chr16	4465154	4475200	-
MSTRG.11439	chr16	4967625	4967835	+
MSTRG.11440	chr16	4974356	4974630	+
MSTRG.11453	chr16	5246655	5247071	+
MSTRG.11427	chr16	5634681	5637284	+
MSTRG.11447	chr16	6480666	6484727	-
MSTRG.11449	chr16	7712891	7713277	-
MSTRG.11450	chr16	8225733	8227574	+
MSTRG.11466	chr16	8792453	8792903	+
MSTRG.11460	chr16	8803199	8803492	-
MSTRG.11471	chr16	9367110	9372936	-
MSTRG.11473	chr16	9914463	9916256	-
MSTRG.11497	chr16	10692156	10709418	-
MSTRG.11503	chr16	11041770	11043031	-
MSTRG.11505	chr16	11049522	11050937	+
MSTRG.11525	chr16	11208214	11208464	+
MSTRG.11526	chr16	11214398	11217563	-
MSTRG.11527	chr16	11217834	11218277	-
MSTRG.11516	chr16	11680206	11685315	+
MSTRG.11518	chr16	11970513	11972292	-
MSTRG.11552	chr16	15404782	15442553	+
MSTRG.11568	chr16	15745948	15823550	-
MSTRG.11594	chr16	17518625	17518835	+
MSTRG.11622	chr16	18089382	18095349	+
MSTRG.11665	chr16	20568859	20569152	+
MSTRG.11679	chr16	20836264	20854197	+
MSTRG.11696	chr16	22125629	22126880	-
MSTRG.11702	chr16	22253245	22253456	-
MSTRG.11706	chr16	22521524	22521931	+
MSTRG.11703	chr16	22778534	22781869	+
MSTRG.11720	chr16	22900559	22917788	-
MSTRG.11714	chr16	23031875	23034418	-
MSTRG.11728	chr16	23954621	23956377	+
MSTRG.11738	chr16	24173589	24197807	+
MSTRG.11740	chr16	24325337	24325641	-
MSTRG.11749	chr16	24906216	24906472	+
MSTRG.11751	chr16	26458125	26458693	+
MSTRG.11753	chr16	26866542	26867453	+
MSTRG.11763	chr16	27442881	27443145	+
MSTRG.11765	chr16	28293836	28295179	+
MSTRG.11780	chr16	30308312	30312247	+
MSTRG.11791	chr16	31174571	31174938	-
MSTRG.11815	chr16	31673744	31675438	-
MSTRG.11823	chr16	32148286	32199720	+
MSTRG.11835	chr16	32410427	32410929	+
MSTRG.11847	chr16	32934030	32934265	+
MSTRG.11841	chr16	33134518	33134913	-
MSTRG.11842	chr16	33137967	33138329	-
MSTRG.11870	chr16	35022965	35023217	+
MSTRG.11871	chr16	35026248	35028396	-
MSTRG.11890	chr16	36085375	36089051	-
MSTRG.11886	chr16	36677130	36677373	+
MSTRG.11907	chr16	37077622	37077901	+
MSTRG.11927	chr16	37700702	37710304	+
MSTRG.11899	chr16	37795174	37799436	-
MSTRG.11901	chr16	37919631	37960202	-
MSTRG.11915	chr16	38484214	38485415	+
MSTRG.11916	chr16	38496375	38496724	-
MSTRG.11933	chr16	38568064	38568645	+
MSTRG.11946	chr16	39913697	39955560	+
MSTRG.11957	chr16	40950278	40951944	+
MSTRG.11948	chr16	42417291	42419557	-
MSTRG.11949	chr16	42472946	42475222	+
MSTRG.11950	chr16	42570049	42570263	+
MSTRG.11970	chr16	42903948	42904824	+
MSTRG.11972	chr16	43046759	43047031	+
MSTRG.11973	chr16	43061390	43061700	+
MSTRG.11975	chr16	43154667	43155096	+
MSTRG.11980	chr16	43361022	43361575	+
MSTRG.11965	chr16	43778689	43780704	+
MSTRG.11985	chr16	44079622	44079991	-
MSTRG.12014	chr16	46810315	47120043	+
MSTRG.12015	chr16	46810931	46825547	+
MSTRG.12018	chr16	47419629	47434736	-
MSTRG.12013	chr16	48035533	48037426	-
MSTRG.12020	chr16	48326125	48326390	+
MSTRG.12023	chr16	49148200	49150280	-
MSTRG.12038	chr16	52554107	52554932	-
MSTRG.12039	chr16	52558602	52559210	-
MSTRG.12041	chr16	53571968	53575650	+
MSTRG.12042	chr16	54867866	54868304	-
MSTRG.12057	chr16	55419689	55420758	-
MSTRG.12058	chr16	55431267	55474332	-
MSTRG.12067	chr16	56058605	56060574	-
MSTRG.12070	chr16	56099877	56100321	+
MSTRG.12071	chr16	56109796	56110035	+
MSTRG.12073	chr16	56131599	56131834	+
MSTRG.12075	chr16	56946639	56949625	-
MSTRG.12079	chr16	58571712	58573598	+
MSTRG.12108	chr16	59436627	59485389	-
MSTRG.12099	chr16	62247279	62247664	-
MSTRG.12102	chr16	63024474	63026136	-
MSTRG.12106	chr16	64652868	64654371	+
MSTRG.12122	chr16	64805053	64806999	-
MSTRG.12128	chr16	65032320	65032903	-
MSTRG.12125	chr16	65562970	65566336	+
MSTRG.12129	chr16	68136288	68137189	-
MSTRG.12137	chr16	68883332	68885581	+
MSTRG.12138	chr16	68957988	68987890	-
MSTRG.12139	chr16	69162919	69165043	+
MSTRG.12143	chr16	71136685	71138420	-
MSTRG.12148	chr16	72916526	72918210	-
MSTRG.12156	chr16	75668981	75683422	-
MSTRG.12157	chr16	76271328	76274256	+
MSTRG.12172	chr16	77360148	77368669	-
MSTRG.12169	chr16	77900119	77901783	-
MSTRG.12210	chr16	79505332	79507312	+
MSTRG.12211	chr16	79505409	79506554	+
MSTRG.12196	chr16	83332104	83333973	-
MSTRG.12197	chr16	83567405	83567800	+
MSTRG.12220	chr16	85782787	85784462	-
MSTRG.12222	chr16	87266205	87291113	-
MSTRG.12234	chr16	87390599	87402156	+
MSTRG.12238	chr16	87697008	87698896	-
MSTRG.12246	chr16	87888497	87937867	+
MSTRG.12241	chr16	88590505	88590837	+
MSTRG.12259	chr16	89183073	89186934	-
MSTRG.12272	chr16	90226849	90227100	+
MSTRG.12268	chr16	90727456	90730397	+
MSTRG.12280	chr16	91479636	91480103	-
MSTRG.12284	chr16	91509086	91509525	-
MSTRG.12328	chr16	91897462	91903907	-
MSTRG.12297	chr16	92144606	93236089	+
MSTRG.12319	chr16	93588716	93589045	+
MSTRG.12293	chr16	93673547	93676921	+
MSTRG.12388	chr16	93979226	93979916	-
MSTRG.12401	chr16	94479332	94482704	-
MSTRG.12338	chr16	94794901	94810681	+
MSTRG.12351	chr16	96190643	96190859	-
MSTRG.12357	chr16	96550232	96654883	+
MSTRG.12368	chr16	97307391	97329684	-
MSTRG.12367	chr16	97503451	97504296	+
MSTRG.12363	chr16	97721663	97724266	+
MSTRG.12426	chr17	4495324	4496847	+
MSTRG.12414	chr17	4985930	4988690	-
MSTRG.12417	chr17	5292767	5293709	-
MSTRG.12418	chr17	5292938	5293723	+
MSTRG.12488	chr17	9190326	9190617	-
MSTRG.12479	chr17	9285013	9289747	-
MSTRG.12492	chr17	9547957	9549416	-
MSTRG.12507	chr17	10725658	10726689	-
MSTRG.12510	chr17	10842230	10842629	+
MSTRG.12511	chr17	10856766	10857104	+
MSTRG.12520	chr17	12006298	12007508	-
MSTRG.12521	chr17	12007763	12009435	-
MSTRG.12548	chr17	13021883	13022739	+
MSTRG.12543	chr17	13090198	13090660	-
MSTRG.12544	chr17	13184472	13195274	-
MSTRG.12545	chr17	13193210	13193854	-
MSTRG.12563	chr17	13586791	13590768	-
MSTRG.12564	chr17	13589911	13591603	-
MSTRG.12565	chr17	13654613	13655299	-
MSTRG.12568	chr17	13730829	13731042	-
MSTRG.12590	chr17	15506672	15506925	+
MSTRG.12596	chr17	15887959	15894924	-
MSTRG.12598	chr17	15926172	15926587	+
MSTRG.12618	chr17	17040578	17041000	-
MSTRG.12619	chr17	17319913	17320156	-
MSTRG.12608	chr17	18197846	18342017	-
MSTRG.12611	chr17	18366212	18760115	+
MSTRG.12657	chr17	22108742	22111851	-
MSTRG.12673	chr17	22502219	22503805	-
MSTRG.12715	chr17	24184615	24184989	+
MSTRG.12759	chr17	25259880	25260197	+
MSTRG.12789	chr17	25873196	25873446	-
MSTRG.12809	chr17	26386671	26386969	-
MSTRG.12817	chr17	26436956	26437754	-
MSTRG.12832	chr17	26799104	26802012	-
MSTRG.12833	chr17	26800337	26809837	+
MSTRG.12839	chr17	27210962	27214098	+
MSTRG.12844	chr17	27415093	27416236	-
MSTRG.12847	chr17	27461258	27462945	+
MSTRG.12850	chr17	27695145	27697261	-
MSTRG.12893	chr17	28391256	28391886	-
MSTRG.12898	chr17	28545231	28556733	-
MSTRG.12954	chr17	29670091	29672614	+
MSTRG.12940	chr17	29902195	29902511	+
MSTRG.12996	chr17	32257370	32263163	-
MSTRG.13017	chr17	32602056	32604300	-
MSTRG.13029	chr17	33110900	33112315	-
MSTRG.13091	chr17	34379266	34460782	-
MSTRG.13074	chr17	34461887	34462747	-
MSTRG.13115	chr17	34826626	34826920	-
MSTRG.13121	chr17	34858684	34859581	+
MSTRG.13140	chr17	35276142	35303668	-
MSTRG.13141	chr17	35276856	35296679	+
MSTRG.13143	chr17	35303860	35304134	-
MSTRG.13135	chr17	35390563	35390784	+
MSTRG.13154	chr17	35404904	35450491	+
MSTRG.13155	chr17	35421401	35466943	+
MSTRG.13138	chr17	35496199	35496841	-
MSTRG.13186	chr17	35995102	35995599	+
MSTRG.13187	chr17	35997948	35998939	+
MSTRG.13183	chr17	36230997	36231606	-
MSTRG.13184	chr17	36231170	36233401	+
MSTRG.13213	chr17	36720959	36722721	-
MSTRG.13225	chr17	37082627	37082870	+
MSTRG.13230	chr17	37546306	37549896	-
MSTRG.13224	chr17	37712608	37713142	-
MSTRG.13233	chr17	39975011	39975231	-
MSTRG.13236	chr17	40683132	40690007	+
MSTRG.13238	chr17	40688902	40738110	+
MSTRG.13235	chr17	40921180	40921538	-
MSTRG.13243	chr17	41390905	41392563	-
MSTRG.13260	chr17	45134408	45135100	-
MSTRG.13261	chr17	45135552	45136150	-
MSTRG.13308	chr17	46554767	46554988	-
MSTRG.13327	chr17	46739304	47407038	+
MSTRG.13329	chr17	46772122	46773838	-
MSTRG.13348	chr17	47589390	47590944	+
MSTRG.13352	chr17	47635243	47636499	+
MSTRG.13318	chr17	47986725	47996320	-
MSTRG.13322	chr17	48190488	48191798	+
MSTRG.13321	chr17	48211183	48211396	-
MSTRG.13371	chr17	49531197	49532675	-
MSTRG.13378	chr17	50293803	50294196	+
MSTRG.13385	chr17	51020706	51020989	-
MSTRG.13386	chr17	51068397	51068802	-
MSTRG.13387	chr17	51132983	51133932	-
MSTRG.13388	chr17	51134380	51136263	-
MSTRG.13379	chr17	51476822	51561511	-
MSTRG.13406	chr17	52426104	52743746	+
MSTRG.13389	chr17	53368886	53369220	+
MSTRG.13475	chr17	56722534	56722888	+
MSTRG.13484	chr17	56888138	56888764	-
MSTRG.13498	chr17	57066382	57068120	+
MSTRG.13520	chr17	59045314	59067101	+
MSTRG.13502	chr17	60413471	60414390	-
MSTRG.13522	chr17	62881803	62882778	-
MSTRG.13524	chr17	63043129	63045932	+
MSTRG.13530	chr17	63256623	63258212	+
MSTRG.13531	chr17	63258235	63259632	+
MSTRG.13535	chr17	63484893	63486587	+
MSTRG.13552	chr17	64000977	64048603	+
MSTRG.13538	chr17	64714938	64716734	-
MSTRG.13571	chr17	66152229	66152470	+
MSTRG.13569	chr17	66303761	66304415	-
MSTRG.13578	chr17	66363095	66364357	+
MSTRG.13584	chr17	66606085	66620810	+
MSTRG.13588	chr17	66720690	66733957	+
MSTRG.13580	chr17	67434519	67434837	+
MSTRG.13598	chr17	68200149	68201610	-
MSTRG.13604	chr17	68780086	68780468	-
MSTRG.13605	chr17	68792620	68792874	-
MSTRG.13608	chr17	69294645	69306418	-
MSTRG.13613	chr17	70933128	70934029	+
MSTRG.13614	chr17	70934322	70947780	+
MSTRG.13617	chr17	70963658	70964563	+
MSTRG.13658	chr17	72002198	72122486	-
MSTRG.13662	chr17	72578971	72579234	-
MSTRG.13665	chr17	72904610	72904911	+
MSTRG.13652	chr17	73318652	73320316	-
MSTRG.13650	chr17	73468154	73468484	-
MSTRG.13679	chr17	74285078	74287309	-
MSTRG.13685	chr17	74442326	74443950	+
MSTRG.13690	chr17	75532605	75533103	-
MSTRG.13691	chr17	76707455	76709166	+
MSTRG.13693	chr17	77797396	77800509	+
MSTRG.13695	chr17	77829166	77829580	+
MSTRG.13716	chr17	80024422	80027145	+
MSTRG.13732	chr17	80374727	80374940	+
MSTRG.13734	chr17	80457808	80458045	-
MSTRG.13744	chr17	80608694	80609277	-
MSTRG.13740	chr17	81683885	81716664	+
MSTRG.13746	chr17	82850303	82852839	-
MSTRG.13748	chr17	83482562	83494267	-
MSTRG.13750	chr17	83690062	83690465	-
MSTRG.13764	chr17	84189843	84190695	+
MSTRG.13770	chr17	85249764	85250073	+
MSTRG.13782	chr17	86980495	86982572	-
MSTRG.13784	chr17	87007174	87007460	-
MSTRG.13799	chr17	88022157	88022394	-
MSTRG.13796	chr17	88136051	88143408	-
MSTRG.13812	chr17	88612354	88614612	-
MSTRG.13806	chr17	89092021	89092272	+
MSTRG.13834	chr17	91058661	91059075	-
MSTRG.13822	chr17	91825936	91826169	+
MSTRG.13819	chr17	92038475	92041403	-
MSTRG.13826	chr17	93918434	93920257	+
MSTRG.13827	chr17	93932816	93936066	-
MSTRG.13836	chr18	3061760	3062912	-
MSTRG.13859	chr18	3875108	3875564	-
MSTRG.13847	chr18	3880252	3882987	+
MSTRG.13848	chr18	3975379	3975785	+
MSTRG.13849	chr18	4121299	4121717	+
MSTRG.13852	chr18	4553729	4554050	-
MSTRG.13865	chr18	4806341	4810052	+
MSTRG.13868	chr18	4925027	4925284	+
MSTRG.13874	chr18	5531318	5533550	+
MSTRG.13887	chr18	6516220	6516643	+
MSTRG.13884	chr18	6546742	6546995	-
MSTRG.13897	chr18	7725071	7728591	+
MSTRG.13898	chr18	7998216	7998714	-
MSTRG.13916	chr18	8611191	8618184	-
MSTRG.13919	chr18	8696025	8697121	-
MSTRG.13921	chr18	8745237	8746853	-
MSTRG.13924	chr18	8983242	9227051	+
MSTRG.13936	chr18	10586108	10586365	-
MSTRG.13947	chr18	11371628	11372089	-
MSTRG.13968	chr18	12227206	12228180	-
MSTRG.13961	chr18	12367326	12370326	-
MSTRG.13958	chr18	12592519	12593220	-
MSTRG.13975	chr18	13040012	13041465	-
MSTRG.13978	chr18	13412351	13413956	-
MSTRG.14001	chr18	14444897	14446722	+
MSTRG.13995	chr18	14570860	14571090	+
MSTRG.13993	chr18	14663921	14665785	-
MSTRG.14000	chr18	16921117	16922799	+
MSTRG.14004	chr18	18251242	19682106	+
MSTRG.14005	chr18	18492999	18493249	-
MSTRG.14006	chr18	18493805	18494952	-
MSTRG.14016	chr18	19943354	20638857	-
MSTRG.14035	chr18	21380055	21380725	-
MSTRG.14045	chr18	23135008	23206314	-
MSTRG.14047	chr18	23155420	23159793	+
MSTRG.14061	chr18	24266276	24266614	+
MSTRG.14085	chr18	25169104	25171214	+
MSTRG.14086	chr18	25295492	25295811	+
MSTRG.14087	chr18	25297333	25297640	+
MSTRG.14067	chr18	28007325	28010101	+
MSTRG.14068	chr18	28117193	28168377	+
MSTRG.14108	chr18	31723472	31724755	+
MSTRG.14124	chr18	32213020	32213375	+
MSTRG.14126	chr18	32269945	32270917	-
MSTRG.14132	chr18	33366917	33390410	-
MSTRG.14148	chr18	34440571	34441359	-
MSTRG.14150	chr18	34466305	34469463	-
MSTRG.14153	chr18	34547856	34550931	-
MSTRG.14192	chr18	35603695	35603954	+
MSTRG.14184	chr18	35808079	35808596	+
MSTRG.14186	chr18	35842042	35843260	+
MSTRG.14187	chr18	36213206	36213459	+
MSTRG.14198	chr18	36559189	36560326	-
MSTRG.14214	chr18	38138050	38139895	+
MSTRG.14215	chr18	38138601	38141831	+
MSTRG.14276	chr18	38519280	38520701	+
MSTRG.14268	chr18	38547417	38547858	+
MSTRG.14285	chr18	38934275	39192394	-
MSTRG.14277	chr18	40051665	40052014	+
MSTRG.14292	chr18	41337117	42184286	+
MSTRG.14311	chr18	43504220	43504439	+
MSTRG.14317	chr18	43552263	43552527	+
MSTRG.14318	chr18	43553110	43553317	+
MSTRG.14319	chr18	43569711	43569913	+
MSTRG.14337	chr18	44873236	44873641	-
MSTRG.14338	chr18	44874456	44874857	-
MSTRG.14351	chr18	45456357	45456883	+
MSTRG.14352	chr18	45457222	45458165	+
MSTRG.14354	chr18	45558087	45559310	-
MSTRG.14374	chr18	47051220	47052049	+
MSTRG.14383	chr18	48064687	48141788	-
MSTRG.14384	chr18	48066058	48981726	-
MSTRG.14391	chr18	49752192	49752677	-
MSTRG.14397	chr18	50029318	50029801	-
MSTRG.14398	chr18	50039323	50039537	-
MSTRG.14400	chr18	50056031	50057785	-
MSTRG.14405	chr18	50457671	50458083	-
MSTRG.14406	chr18	50512315	50512919	-
MSTRG.14407	chr18	50519011	50519452	-
MSTRG.14408	chr18	52207500	52208172	+
MSTRG.14419	chr18	53451527	53463870	-
MSTRG.14426	chr18	53962866	53963314	-
MSTRG.14454	chr18	57811944	57814633	+
MSTRG.14441	chr18	57878109	57878339	-
MSTRG.14442	chr18	57947736	57949876	-
MSTRG.14455	chr18	58419557	58420300	-
MSTRG.14461	chr18	59617569	60044182	+
MSTRG.14467	chr18	59953493	59954009	-
MSTRG.14489	chr18	61725795	61726193	+
MSTRG.14495	chr18	62449239	62828798	-
MSTRG.14511	chr18	63171495	63179364	+
MSTRG.14514	chr18	64136574	64166071	+
MSTRG.14534	chr18	65170387	65175984	-
MSTRG.14549	chr18	65537955	65538302	+
MSTRG.14558	chr18	66717897	66725235	-
MSTRG.14551	chr18	66829354	66830372	-
MSTRG.14594	chr18	67769658	67770102	-
MSTRG.14588	chr18	67968746	67970774	-
MSTRG.14598	chr18	69726430	69728026	+
MSTRG.14599	chr18	70147793	70149501	-
MSTRG.14605	chr18	70798687	70801345	-
MSTRG.14625	chr18	72533861	72538318	-
MSTRG.14617	chr18	73767743	73767968	-
MSTRG.14629	chr18	73768815	73769533	-
MSTRG.14662	chr18	77064496	77064987	-
MSTRG.14661	chr18	77526075	77529452	+
MSTRG.14667	chr18	77743868	77751704	+
MSTRG.14668	chr18	77756933	77757258	+
MSTRG.14675	chr18	77977046	77977908	+
MSTRG.14681	chr18	78128221	78128440	+
MSTRG.14687	chr18	78695707	78696235	-
MSTRG.14699	chr18	80304373	80306041	-
MSTRG.14707	chr18	81476879	81481199	-
MSTRG.14709	chr18	82136524	82139401	-
MSTRG.14723	chr18	82615384	82615775	-
MSTRG.14721	chr18	82711668	82711881	+
MSTRG.14737	chr18	83379831	83380080	+
MSTRG.14739	chr18	83403785	83404077	+
MSTRG.14750	chr18	84793283	84793507	-
MSTRG.14756	chr18	86385662	86389757	-
MSTRG.14757	chr18	86671336	86671639	+
MSTRG.14784	chr18	89314024	89314536	-
MSTRG.14768	chr18	90495650	90498116	-
MSTRG.14776	chr19	3160322	3181712	+
MSTRG.14811	chr19	3868235	3868560	+
MSTRG.14821	chr19	4216686	4217100	-
MSTRG.14850	chr19	4771750	4771959	+
MSTRG.14901	chr19	5576305	5578304	+
MSTRG.14905	chr19	5636094	5637707	-
MSTRG.14919	chr19	5654474	5664627	+
MSTRG.14922	chr19	5694444	5695104	-
MSTRG.14910	chr19	5803750	5804117	+
MSTRG.14953	chr19	6593303	6593896	-
MSTRG.14954	chr19	6602564	6603032	-
MSTRG.15007	chr19	8808095	8808464	+
MSTRG.15034	chr19	9413739	9422592	-
MSTRG.15036	chr19	9521444	9521667	+
MSTRG.15033	chr19	9660532	9662952	+
MSTRG.15043	chr19	9918701	9918968	+
MSTRG.15070	chr19	10920881	10921370	+
MSTRG.15080	chr19	10954576	10956258	-
MSTRG.15097	chr19	11775519	11776854	+
MSTRG.15094	chr19	11877285	11877492	-
MSTRG.15098	chr19	12009530	12009758	-
MSTRG.15100	chr19	12379558	12381262	+
MSTRG.15121	chr19	12597914	12662272	-
MSTRG.15105	chr19	13243567	13245648	+
MSTRG.15112	chr19	13947337	13952906	+
MSTRG.15114	chr19	14398607	14404543	-
MSTRG.15131	chr19	15677978	15757340	-
MSTRG.15142	chr19	16136612	16146222	+
MSTRG.15144	chr19	16228213	16232380	+
MSTRG.15148	chr19	16328808	16329078	+
MSTRG.15167	chr19	16766597	16767341	-
MSTRG.15151	chr19	17037425	17039124	+
MSTRG.15156	chr19	18139580	18140877	+
MSTRG.15159	chr19	18668226	18670240	+
MSTRG.15177	chr19	19958454	19978876	+
MSTRG.15189	chr19	20917635	20919010	+
MSTRG.15204	chr19	23711749	23712087	+
MSTRG.15208	chr19	23918445	23956288	-
MSTRG.15235	chr19	27499342	27499572	-
MSTRG.15244	chr19	27926120	27926327	-
MSTRG.15245	chr19	27949643	27950929	-
MSTRG.15246	chr19	27992258	27994103	-
MSTRG.15258	chr19	29004333	29004851	+
MSTRG.15288	chr19	30963892	30967334	+
MSTRG.15291	chr19	31436783	31438498	+
MSTRG.15296	chr19	32360583	32360821	-
MSTRG.15292	chr19	32457425	32462542	-
MSTRG.15300	chr19	32712443	32712690	+
MSTRG.15301	chr19	32876706	32879442	-
MSTRG.15304	chr19	33039730	33056307	-
MSTRG.15308	chr19	33419489	33428886	+
MSTRG.15309	chr19	34176213	34176600	-
MSTRG.15314	chr19	34629221	34638419	+
MSTRG.15324	chr19	35483999	35699026	+
MSTRG.15341	chr19	36615680	36615934	+
MSTRG.15342	chr19	36650170	36650898	+
MSTRG.15354	chr19	37735340	37773651	+
MSTRG.15361	chr19	38016427	38019837	+
MSTRG.15376	chr19	39128429	39129515	-
MSTRG.15400	chr19	41790851	41822450	+
MSTRG.15408	chr19	42009195	42011901	-
MSTRG.15451	chr19	44120352	44120818	+
MSTRG.15453	chr19	44353344	44452236	-
MSTRG.15458	chr19	44577971	44580232	+
MSTRG.15459	chr19	44579637	44584581	-
MSTRG.15460	chr19	44583250	44589438	+
MSTRG.15462	chr19	44840459	44842485	-
MSTRG.15471	chr19	45074503	45074829	-
MSTRG.15468	chr19	45183212	45183592	-
MSTRG.15478	chr19	45725680	45729549	+
MSTRG.15479	chr19	45729698	45731626	+
MSTRG.15487	chr19	45744729	45744964	-
MSTRG.15491	chr19	45786164	45786908	-
MSTRG.15511	chr19	46463471	46463685	+
MSTRG.15528	chr19	47194747	47196421	+
MSTRG.15545	chr19	48029102	48034777	-
MSTRG.15565	chr19	50662853	50664131	-
MSTRG.15568	chr19	50706779	50713946	+
MSTRG.15554	chr19	51248180	51249423	-
MSTRG.15555	chr19	51249585	51251081	-
MSTRG.15552	chr19	52572102	52581468	-
MSTRG.15573	chr19	52968894	52970602	-
MSTRG.15582	chr19	53616939	53617205	+
MSTRG.15593	chr19	54009134	54009915	+
MSTRG.15587	chr19	54602824	54613155	-
MSTRG.15594	chr19	55005589	55016516	-
MSTRG.15597	chr19	55668824	55672506	+
MSTRG.15628	chr19	57031185	57033832	+
MSTRG.15618	chr19	57423767	57427781	-
MSTRG.15619	chr19	57427912	57429731	+
MSTRG.15624	chr19	57560229	57567622	-
MSTRG.15636	chr19	57770700	57770915	-
MSTRG.15638	chr19	58013591	58023004	+
MSTRG.15641	chr19	58134033	58143521	-
MSTRG.15633	chr19	58353702	58354068	+
MSTRG.15649	chr19	58976020	58978683	-
MSTRG.15650	chr19	58993654	58993973	-
MSTRG.15651	chr19	59032956	59051211	+
MSTRG.15642	chr19	59134121	59134496	-
MSTRG.15644	chr19	59222051	59224112	-
MSTRG.15652	chr19	59839881	59842272	+
MSTRG.15661	chr19	60752355	60752658	-
MSTRG.15678	chr19	61017260	61021826	+
MSTRG.15680	chr19	61098056	61098270	+
MSTRG.15693	chr2	3487188	3488561	-
MSTRG.15704	chr2	4701325	4701562	+
MSTRG.15729	chr2	4737464	4737839	+
MSTRG.15730	chr2	4807377	4818332	-
MSTRG.15720	chr2	4955104	4961194	+
MSTRG.15738	chr2	5546782	5548714	-
MSTRG.15753	chr2	6042532	6052459	-
MSTRG.15781	chr2	7404131	7409352	+
MSTRG.15759	chr2	7928824	7945940	-
MSTRG.15760	chr2	8189820	8190598	-
MSTRG.15761	chr2	8445780	8457675	-
MSTRG.15762	chr2	8901987	8904951	+
MSTRG.15763	chr2	9035118	9081050	-
MSTRG.15769	chr2	9930549	9930917	-
MSTRG.15943	chr2	10639875	10652089	-
MSTRG.15787	chr2	10887217	10889631	-
MSTRG.15786	chr2	11241741	11244064	-
MSTRG.15797	chr2	11753238	11754752	+
MSTRG.15793	chr2	11933086	11998846	-
MSTRG.15804	chr2	12411661	12416901	-
MSTRG.15798	chr2	12666961	12668579	+
MSTRG.15971	chr2	15819982	15821548	-
MSTRG.15977	chr2	17630824	17632873	-
MSTRG.15978	chr2	17633998	17634445	-
MSTRG.15965	chr2	17885431	17885845	+
MSTRG.15962	chr2	17940658	17941086	+
MSTRG.15967	chr2	18027613	18028449	+
MSTRG.16006	chr2	19581437	19582082	+
MSTRG.16024	chr2	20423528	20426518	+
MSTRG.16036	chr2	21928021	21964066	-
MSTRG.16041	chr2	22258054	22260100	-
MSTRG.16048	chr2	22836485	22837335	-
MSTRG.16049	chr2	22839300	22840034	-
MSTRG.16055	chr2	22943323	22943663	-
MSTRG.16056	chr2	22954843	22955780	-
MSTRG.16058	chr2	23035154	23036275	-
MSTRG.16088	chr2	24860037	24860240	-
MSTRG.16085	chr2	24941766	24948527	-
MSTRG.16093	chr2	25117040	25119442	-
MSTRG.16110	chr2	25254287	25254518	-
MSTRG.16115	chr2	25327449	25332581	-
MSTRG.16140	chr2	25848108	25854619	+
MSTRG.16174	chr2	26334722	26338285	-
MSTRG.16177	chr2	26354162	26354626	+
MSTRG.16155	chr2	26604801	26605011	+
MSTRG.16156	chr2	26605846	26606093	+
MSTRG.16168	chr2	26944487	26944687	+
MSTRG.16190	chr2	27402027	27403409	+
MSTRG.16192	chr2	27783458	27787792	-
MSTRG.16184	chr2	28055871	28057513	+
MSTRG.16210	chr2	28841097	28841386	+
MSTRG.16250	chr2	30900992	30910911	+
MSTRG.16248	chr2	30970744	30971019	+
MSTRG.16268	chr2	31673567	31674001	+
MSTRG.16322	chr2	33204280	33204488	-
MSTRG.16333	chr2	33701665	33738237	+
MSTRG.16334	chr2	33708768	33709009	+
MSTRG.16337	chr2	33742379	33748232	+
MSTRG.16332	chr2	34095251	34096276	+
MSTRG.16341	chr2	34372045	34372769	-
MSTRG.16356	chr2	34760494	34760995	+
MSTRG.16359	chr2	34802350	34811778	+
MSTRG.16360	chr2	34804234	34804769	+
MSTRG.16385	chr2	36348988	37099007	+
MSTRG.16396	chr2	36705677	36729798	-
MSTRG.16418	chr2	37098127	37099919	+
MSTRG.16467	chr2	39414131	39419124	-
MSTRG.16469	chr2	40038339	40055132	-
MSTRG.16471	chr2	43682007	43698157	-
MSTRG.16485	chr2	43923287	43924890	-
MSTRG.16488	chr2	44468295	44471778	-
MSTRG.16491	chr2	44667682	44668341	-
MSTRG.16483	chr2	46309510	46312350	+
MSTRG.16494	chr2	46316700	46347908	-
MSTRG.16498	chr2	47641670	47642557	-
MSTRG.16504	chr2	48498455	48543047	-
MSTRG.16517	chr2	49037507	49041419	-
MSTRG.16521	chr2	50709096	50710613	+
MSTRG.16528	chr2	51794879	51796533	+
MSTRG.16538	chr2	52916876	52919254	+
MSTRG.16542	chr2	53518956	53521311	-
MSTRG.16553	chr2	56774902	56785671	-
MSTRG.16545	chr2	56989516	56991509	+
MSTRG.16562	chr2	59465547	59466248	-
MSTRG.16578	chr2	60296525	60297658	+
MSTRG.16588	chr2	62021630	62023616	+
MSTRG.16634	chr2	63724435	63725282	-
MSTRG.16610	chr2	63725773	63835391	-
MSTRG.16604	chr2	65755138	65755342	-
MSTRG.16648	chr2	70211943	70218939	-
MSTRG.16653	chr2	70876763	70884451	-
MSTRG.16665	chr2	71674958	71677226	+
MSTRG.16678	chr2	72667642	72672478	+
MSTRG.16703	chr2	74563937	74564910	-
MSTRG.16741	chr2	78812236	78812748	+
MSTRG.16740	chr2	78813312	78814266	+
MSTRG.16745	chr2	79488432	79489525	-
MSTRG.16747	chr2	80196252	80211672	+
MSTRG.16759	chr2	80634054	80634494	+
MSTRG.16761	chr2	83444973	83720369	-
MSTRG.16767	chr2	84001550	84002693	+
MSTRG.16776	chr2	85894379	85896052	+
MSTRG.16786	chr2	88190180	88191981	+
MSTRG.16813	chr2	90736850	90737663	-
MSTRG.16875	chr2	91070424	91071739	+
MSTRG.16880	chr2	91236894	91237364	+
MSTRG.16969	chr2	91730493	91730744	+
MSTRG.16905	chr2	92792656	92794673	-
MSTRG.16900	chr2	92966741	92966994	-
MSTRG.16898	chr2	93297981	93298183	+
MSTRG.16932	chr2	95688913	96304341	-
MSTRG.16928	chr2	97931619	97944134	-
MSTRG.16940	chr2	100175023	100175567	-
MSTRG.16964	chr2	100507286	100674151	+
MSTRG.16946	chr2	101088957	101314891	-
MSTRG.16942	chr2	101437077	101437688	+
MSTRG.16978	chr2	101704214	101704613	+
MSTRG.16984	chr2	103818518	103818926	-
MSTRG.16998	chr2	104085278	104085886	+
MSTRG.17007	chr2	104666172	104670745	-
MSTRG.17008	chr2	104674850	104675081	-
MSTRG.17009	chr2	104694549	104694872	+
MSTRG.17010	chr2	104696207	104697279	+
MSTRG.17035	chr2	106834388	106834672	+
MSTRG.17039	chr2	107033397	108840231	+
MSTRG.17046	chr2	107867959	107868395	-
MSTRG.17055	chr2	108834079	108838526	-
MSTRG.17069	chr2	110277915	110690810	+
MSTRG.17067	chr2	111594418	111597106	-
MSTRG.17093	chr2	111857574	111859001	-
MSTRG.17126	chr2	113351724	113352869	+
MSTRG.17077	chr2	113976853	113996460	+
MSTRG.17086	chr2	115717610	115717835	+
MSTRG.17163	chr2	117207650	117214175	+
MSTRG.17164	chr2	117212842	117215299	-
MSTRG.17145	chr2	117709013	117760298	+
MSTRG.17148	chr2	117789998	117859246	-
MSTRG.17153	chr2	117858227	117865982	+
MSTRG.17158	chr2	118585676	118590958	-
MSTRG.17159	chr2	118589876	118592488	+
MSTRG.17141	chr2	119040922	119042581	+
MSTRG.17200	chr2	119883699	119884831	-
[truncated: 2,831 more rows]
