# Supplementary material for: Newly Evolved Endogenous Retroviruses Prime the Ovarian Reserve for Activation
Source: Research Square preprint supplement (doi:10.21203/rs.3.rs-8081066/v1), 2025-12-03
Supplement: Supplementary file 2 [file 89d266095edd481d00f80050.xlsx]

## Sheet: Supplemental Data Set 2
Supplemental Data Set 2: List of 21,150 novel transcripts.
transcript_id	Chr	Start	End	Strand
MSTRG.63.4	chr1	3216616	3614324	-
MSTRG.75.1	chr1	4256482	4258667	+
MSTRG.77.3	chr1	4773638	4785739	-
MSTRG.79.11	chr1	4816768	4846783	+
MSTRG.79.12	chr1	4817413	4846783	+
MSTRG.79.13	chr1	4817797	4846995	+
MSTRG.79.15	chr1	4857163	4898565	+
MSTRG.86.3	chr1	5083110	5163198	+
MSTRG.107.1	chr1	5508503	6664430	-
MSTRG.107.2	chr1	5508769	5644608	-
MSTRG.108.1	chr1	5564546	5567658	-
MSTRG.108.2	chr1	5564706	5567658	-
MSTRG.115.5	chr1	6214645	6265810	+
MSTRG.107.3	chr1	6325362	6664430	-
MSTRG.120.1	chr1	6415960	6443787	+
MSTRG.124.1	chr1	6690856	6693799	+
MSTRG.95.1	chr1	7280631	7456222	+
MSTRG.95.2	chr1	7281161	7490747	+
MSTRG.95.4	chr1	7281161	7526957	+
MSTRG.95.7	chr1	7281161	7538075	+
MSTRG.95.12	chr1	7281192	7543758	+
MSTRG.95.13	chr1	7281192	7288778	+
MSTRG.90.1	chr1	7605436	7606921	-
MSTRG.91.1	chr1	8027025	8179590	-
MSTRG.91.2	chr1	8027062	8029946	-
MSTRG.91.3	chr1	8027065	8030431	-
MSTRG.91.4	chr1	8027763	8179590	-
MSTRG.140.1	chr1	8712727	8799448	+
MSTRG.140.2	chr1	8712732	8817356	+
MSTRG.140.3	chr1	8712963	8799448	+
MSTRG.140.4	chr1	8712963	9528386	+
MSTRG.101.6	chr1	9565530	9577970	+
MSTRG.155.1	chr1	9667410	9700209	-
MSTRG.155.4	chr1	9673476	9700209	-
MSTRG.130.1	chr1	9959978	9967982	-
MSTRG.130.2	chr1	9960139	9967982	-
MSTRG.161.13	chr1	10039803	10134230	+
MSTRG.161.14	chr1	10039823	10062501	+
MSTRG.161.29	chr1	10121732	10136768	+
MSTRG.158.1	chr1	10137571	10233423	-
MSTRG.158.2	chr1	10137571	10185777	-
MSTRG.157.1	chr1	10922237	10925513	-
MSTRG.157.2	chr1	10922279	10925513	-
MSTRG.157.3	chr1	10922292	10925513	-
MSTRG.157.4	chr1	10922419	10925513	-
MSTRG.164.1	chr1	10948275	10966443	+
MSTRG.165.1	chr1	10970665	11234940	+
MSTRG.156.1	chr1	11384075	11389948	-
MSTRG.175.1	chr1	11550627	11708135	-
MSTRG.175.2	chr1	11551103	12482740	-
MSTRG.175.3	chr1	11551328	11708135	-
MSTRG.175.4	chr1	11551328	11708135	-
MSTRG.175.5	chr1	11706707	12333077	-
MSTRG.178.1	chr1	11706749	12333220	+
MSTRG.179.3	chr1	12038854	12041146	-
MSTRG.178.2	chr1	12331699	12333325	+
MSTRG.171.1	chr1	12866549	12928063	-
MSTRG.171.2	chr1	12866549	12928063	-
MSTRG.163.1	chr1	13040754	13041134	-
MSTRG.170.2	chr1	13078421	13094406	+
MSTRG.188.2	chr1	13139159	13373823	-
MSTRG.188.3	chr1	13139159	13373458	-
MSTRG.191.1	chr1	13257180	13258286	-
MSTRG.184.1	chr1	13722165	13771331	+
MSTRG.187.1	chr1	14082811	14084657	+
MSTRG.187.2	chr1	14083026	14084657	+
MSTRG.202.1	chr1	14168953	14310235	-
MSTRG.202.2	chr1	14168953	14310235	-
MSTRG.199.1	chr1	15072868	15076931	+
MSTRG.200.1	chr1	15080592	15082936	+
MSTRG.200.2	chr1	15080999	15107252	+
MSTRG.198.1	chr1	15162267	15163904	+
MSTRG.201.1	chr1	15211193	15212758	-
MSTRG.205.1	chr1	15285407	15286781	-
MSTRG.210.1	chr1	15805646	15848419	+
MSTRG.211.1	chr1	16017123	16020092	+
MSTRG.212.1	chr1	16101295	16104662	-
MSTRG.213.3	chr1	16104724	16133734	+
MSTRG.213.4	chr1	16104724	16133734	+
MSTRG.213.5	chr1	16104758	16133734	+
MSTRG.213.6	chr1	16105317	16133734	+
MSTRG.217.10	chr1	16344291	16458723	-
MSTRG.217.13	chr1	16344630	16518910	-
MSTRG.217.14	chr1	16344668	16518910	-
MSTRG.214.2	chr1	16564338	16619489	-
MSTRG.214.4	chr1	16565806	16619489	-
MSTRG.223.6	chr1	16643342	16656911	-
MSTRG.224.1	chr1	16687991	16709684	+
MSTRG.220.1	chr1	16710322	16711285	-
MSTRG.221.1	chr1	16711414	16713831	-
MSTRG.225.1	chr1	16767248	16767673	-
MSTRG.231.1	chr1	16900036	16926688	+
MSTRG.232.1	chr1	16901453	16903112	-
MSTRG.234.3	chr1	16994949	17097889	-
MSTRG.234.4	chr1	16994952	17097889	-
MSTRG.236.4	chr1	17151071	17164354	+
MSTRG.236.5	chr1	17151107	17164354	+
MSTRG.229.1	chr1	18156139	18157836	-
MSTRG.239.1	chr1	18537910	18538372	+
MSTRG.238.1	chr1	18630066	18644906	-
MSTRG.242.1	chr1	18760626	19286756	+
MSTRG.242.2	chr1	18760940	18764768	+
MSTRG.249.1	chr1	19174313	19185294	-
MSTRG.240.2	chr1	19309678	19317211	+
MSTRG.253.2	chr1	20117592	20486556	-
MSTRG.255.1	chr1	20126625	20703495	+
MSTRG.257.1	chr1	20393247	20703965	+
MSTRG.252.1	chr1	20777144	20790617	-
MSTRG.268.1	chr1	21188753	21202035	-
MSTRG.268.2	chr1	21189729	21202035	-
MSTRG.272.1	chr1	21331776	21332008	+
MSTRG.275.1	chr1	21347336	21370845	+
MSTRG.275.2	chr1	21349559	21370845	+
MSTRG.275.4	chr1	21349641	21386373	+
MSTRG.275.6	chr1	21368161	21386373	+
MSTRG.275.7	chr1	21368166	21386373	+
MSTRG.273.1	chr1	22154277	22155519	-
MSTRG.274.1	chr1	22157623	22159411	-
MSTRG.287.1	chr1	22285960	22432988	-
MSTRG.287.2	chr1	22286002	22428621	-
MSTRG.281.1	chr1	23256940	23262858	+
MSTRG.282.1	chr1	23264313	23264739	+
MSTRG.283.1	chr1	23266149	23294075	+
MSTRG.292.2	chr1	23845625	23922317	-
MSTRG.297.1	chr1	24010903	24049333	-
MSTRG.298.1	chr1	24025579	24026265	+
MSTRG.307.1	chr1	25177633	25187790	+
MSTRG.307.2	chr1	25177633	25187790	+
MSTRG.307.3	chr1	25177633	25187790	+
MSTRG.307.4	chr1	25177649	25187790	+
MSTRG.301.1	chr1	26117739	26121842	+
MSTRG.302.1	chr1	28248173	28251363	-
MSTRG.305.1	chr1	29494230	29494853	-
MSTRG.331.1	chr1	29698041	30575190	+
MSTRG.331.2	chr1	29698077	29702451	+
MSTRG.331.3	chr1	29698665	30576921	+
MSTRG.335.2	chr1	30264367	30267399	-
MSTRG.331.4	chr1	30574085	30577372	+
MSTRG.331.5	chr1	30574101	30577372	+
MSTRG.331.6	chr1	30574115	30577372	+
MSTRG.331.7	chr1	30574115	30576921	+
MSTRG.339.1	chr1	30674175	30894564	-
MSTRG.340.1	chr1	30675800	30895199	+
MSTRG.344.3	chr1	30802342	30873921	-
MSTRG.344.6	chr1	30803106	30873921	-
MSTRG.337.1	chr1	30927119	30927324	-
MSTRG.352.1	chr1	31169534	31171326	-
MSTRG.356.1	chr1	31542578	31772040	-
MSTRG.357.1	chr1	31542982	32486419	+
MSTRG.359.2	chr1	31615589	31616869	+
MSTRG.362.1	chr1	31957278	31965115	-
MSTRG.363.1	chr1	32066244	32067195	+
MSTRG.363.2	chr1	32066254	32067195	+
MSTRG.366.1	chr1	32221176	32230427	-
MSTRG.357.2	chr1	32405661	32487127	+
MSTRG.357.3	chr1	32406654	32487127	+
MSTRG.354.1	chr1	33058910	33066102	-
MSTRG.373.3	chr1	33570900	33669795	-
MSTRG.373.4	chr1	33571105	33669795	-
MSTRG.379.2	chr1	33761258	33814595	-
MSTRG.414.1	chr1	33850075	33862808	+
MSTRG.414.2	chr1	33850075	33861489	+
MSTRG.414.3	chr1	33850076	34308661	+
MSTRG.414.6	chr1	33850120	33861489	+
MSTRG.414.7	chr1	33850319	33861489	+
MSTRG.414.9	chr1	33907815	34308661	+
MSTRG.414.11	chr1	33907887	34308661	+
MSTRG.414.12	chr1	33907919	34308661	+
MSTRG.414.16	chr1	34005555	34308661	+
MSTRG.414.17	chr1	34005880	34308661	+
MSTRG.414.27	chr1	34035479	34308661	+
MSTRG.414.28	chr1	34035512	34308661	+
MSTRG.421.1	chr1	34143943	34144915	+
MSTRG.382.1	chr1	34603009	34604934	-
MSTRG.385.1	chr1	34632490	34636346	-
MSTRG.397.3	chr1	34750581	34813309	+
MSTRG.401.1	chr1	34812818	34843065	-
MSTRG.403.5	chr1	34855024	34879580	+
MSTRG.403.6	chr1	34855024	34879580	+
MSTRG.403.7	chr1	34855070	34879580	+
MSTRG.403.8	chr1	34860453	34879580	+
MSTRG.403.9	chr1	34860453	34879580	+
MSTRG.389.1	chr1	35271849	35322599	+
MSTRG.389.3	chr1	35316310	35317418	+
MSTRG.389.4	chr1	35316314	35344546	+
MSTRG.389.5	chr1	35316607	35344546	+
MSTRG.389.6	chr1	35317493	35320044	+
MSTRG.390.1	chr1	35564530	35566026	-
MSTRG.391.1	chr1	35567093	35608435	-
MSTRG.392.1	chr1	35599782	35601406	-
MSTRG.393.1	chr1	35709533	35726778	-
MSTRG.393.3	chr1	35723949	35726778	-
MSTRG.394.1	chr1	35734952	35735189	-
MSTRG.395.1	chr1	35867100	35895819	-
MSTRG.450.1	chr1	36335730	36369334	-
MSTRG.450.2	chr1	36335730	36369334	-
MSTRG.450.3	chr1	36335730	36369334	-
MSTRG.450.7	chr1	36335748	36369104	-
MSTRG.450.8	chr1	36335748	36369004	-
MSTRG.450.17	chr1	36414884	36445271	-
MSTRG.450.18	chr1	36415913	36445271	-
MSTRG.450.20	chr1	36418252	36443034	-
MSTRG.450.21	chr1	36419871	36445271	-
MSTRG.450.24	chr1	36423186	36430601	-
MSTRG.452.1	chr1	36426762	36427202	-
MSTRG.453.1	chr1	36437181	36437505	-
MSTRG.410.1	chr1	36511859	36529543	+
MSTRG.410.2	chr1	36511864	36529543	+
MSTRG.432.1	chr1	36562675	36683306	-
MSTRG.432.2	chr1	36562675	36683306	-
MSTRG.432.7	chr1	36562698	36587687	-
MSTRG.432.8	chr1	36562698	36584139	-
MSTRG.432.9	chr1	36562698	36584139	-
MSTRG.432.10	chr1	36562752	36683306	-
MSTRG.460.6	chr1	36750210	36766115	+
MSTRG.460.7	chr1	36750210	36782818	+
MSTRG.435.3	chr1	36792277	36940001	-
MSTRG.435.4	chr1	36792277	36828876	-
MSTRG.435.8	chr1	36814142	36940001	-
MSTRG.427.3	chr1	37299893	37410736	+
MSTRG.427.5	chr1	37299901	37410736	+
MSTRG.427.8	chr1	37299919	37410736	+
MSTRG.456.2	chr1	37754584	37865079	-
MSTRG.456.5	chr1	37760455	37864836	-
MSTRG.457.1	chr1	37780359	37783877	+
MSTRG.456.9	chr1	37781369	37864836	-
MSTRG.456.10	chr1	37781516	37864836	-
MSTRG.456.11	chr1	37781516	37855373	-
MSTRG.456.13	chr1	37800314	37864836	-
MSTRG.456.14	chr1	37800346	37864836	-
MSTRG.456.15	chr1	37800397	37865079	-
MSTRG.456.17	chr1	37831011	37865079	-
MSTRG.439.3	chr1	37872251	37877634	+
MSTRG.441.4	chr1	37890543	37898535	+
MSTRG.482.1	chr1	37944423	38836711	-
MSTRG.485.1	chr1	37977590	37983737	-
MSTRG.486.5	chr1	37987478	37997893	-
MSTRG.487.3	chr1	37998155	38036456	+
MSTRG.487.4	chr1	37998155	38024986	+
MSTRG.488.2	chr1	38052589	38129810	-
MSTRG.488.3	chr1	38052644	38129810	-
MSTRG.488.11	chr1	38052812	38072738	-
MSTRG.488.7	chr1	38052812	38131303	-
MSTRG.488.8	chr1	38052812	38129810	-
MSTRG.488.9	chr1	38052812	38129810	-
MSTRG.488.15	chr1	38052836	38131303	-
MSTRG.491.1	chr1	38177078	38539001	-
MSTRG.491.4	chr1	38177326	38585077	-
MSTRG.491.6	chr1	38177326	38539108	-
MSTRG.491.7	chr1	38177326	38627244	-
MSTRG.491.11	chr1	38177376	38627244	-
MSTRG.491.13	chr1	38210223	38565761	-
MSTRG.496.1	chr1	38653221	38653849	+
MSTRG.465.1	chr1	39045592	39045856	-
MSTRG.468.1	chr1	39192912	39193119	-
MSTRG.470.3	chr1	39220898	39363240	+
MSTRG.470.4	chr1	39341432	39363240	+
MSTRG.474.5	chr1	39380864	39478755	-
MSTRG.477.1	chr1	39650176	39664726	+
MSTRG.477.3	chr1	39659659	39664726	+
MSTRG.480.2	chr1	39665307	39670961	-
MSTRG.512.1	chr1	39900115	40025390	+
MSTRG.512.2	chr1	39900130	40026310	+
MSTRG.512.4	chr1	39900130	40025390	+
MSTRG.512.5	chr1	39900130	40026310	+
MSTRG.512.10	chr1	39900329	40026310	+
MSTRG.512.11	chr1	39900841	40026310	+
MSTRG.512.23	chr1	39985007	40026310	+
MSTRG.512.24	chr1	39988386	40025390	+
MSTRG.512.26	chr1	39995482	40004913	+
MSTRG.512.27	chr1	39996466	40026310	+
MSTRG.499.1	chr1	40044203	40048603	-
MSTRG.500.4	chr1	40085985	40125231	+
MSTRG.500.5	chr1	40085985	40125231	+
MSTRG.503.2	chr1	40237467	40317257	+
MSTRG.503.3	chr1	40237467	40317257	+
MSTRG.503.4	chr1	40237485	40317257	+
MSTRG.503.5	chr1	40238020	40317257	+
MSTRG.503.10	chr1	40307145	40317257	+
MSTRG.503.9	chr1	40307145	40317257	+
MSTRG.503.11	chr1	40307146	40317257	+
MSTRG.503.12	chr1	40307168	40315339	+
MSTRG.504.1	chr1	40553073	40554459	-
MSTRG.506.3	chr1	40580539	40630725	+
MSTRG.511.2	chr1	40820397	40856887	+
MSTRG.511.3	chr1	40831466	40856887	+
MSTRG.508.1	chr1	40915195	40916920	-
MSTRG.523.1	chr1	40994689	41014367	-
MSTRG.523.2	chr1	40994689	41013766	-
MSTRG.524.1	chr1	41381306	41381870	-
MSTRG.526.1	chr1	42545810	42549576	-
MSTRG.514.1	chr1	42630202	42847983	-
MSTRG.514.2	chr1	42646802	42847983	-
MSTRG.516.5	chr1	42727385	42747397	+
MSTRG.527.3	chr1	43047269	43098703	-
MSTRG.531.4	chr1	43445767	43570515	+
MSTRG.531.6	chr1	43509104	43554582	+
MSTRG.531.7	chr1	43513476	43570515	+
MSTRG.533.1	chr1	43558007	43604180	-
MSTRG.533.2	chr1	43595285	43604180	-
MSTRG.535.3	chr1	43749608	43827800	-
MSTRG.537.1	chr1	43932239	43933890	-
MSTRG.554.1	chr1	44086503	44102441	-
MSTRG.554.2	chr1	44086503	44102441	-
MSTRG.555.1	chr1	44118957	44145101	+
MSTRG.555.3	chr1	44118978	44145101	+
MSTRG.555.4	chr1	44118989	44145101	+
MSTRG.543.2	chr1	44740187	44758207	-
MSTRG.543.3	chr1	44756781	45055321	-
MSTRG.549.1	chr1	45610828	45612162	+
MSTRG.578.5	chr1	46088879	46373550	+
MSTRG.578.6	chr1	46123307	46343871	+
MSTRG.578.8	chr1	46215100	46373550	+
MSTRG.582.1	chr1	46491228	46491684	+
MSTRG.581.5	chr1	46640356	46662630	+
MSTRG.583.6	chr1	46854999	46905135	-
MSTRG.558.1	chr1	47133960	47135470	+
MSTRG.559.1	chr1	47561730	47566548	-
MSTRG.560.1	chr1	48089263	48094306	+
MSTRG.561.1	chr1	48356473	49115362	+
MSTRG.563.1	chr1	48466758	48469023	+
MSTRG.563.2	chr1	48466790	48469023	+
MSTRG.567.1	chr1	48801564	48802096	+
MSTRG.571.3	chr1	49285346	49305500	-
MSTRG.571.5	chr1	49293545	49972320	-
MSTRG.571.7	chr1	49293655	49305500	-
MSTRG.571.8	chr1	49294348	49305500	-
MSTRG.571.10	chr1	49294823	49305500	-
MSTRG.572.1	chr1	49296208	49923787	+
MSTRG.571.12	chr1	49302922	49305598	-
MSTRG.571.13	chr1	49303088	49305500	-
MSTRG.576.1	chr1	51465851	51513246	-
MSTRG.576.6	chr1	51469857	51513246	-
MSTRG.576.13	chr1	51483493	51513246	-
MSTRG.593.1	chr1	51729898	51731809	+
MSTRG.594.2	chr1	51749748	51869998	-
MSTRG.594.3	chr1	51749759	51869038	-
MSTRG.594.4	chr1	51749765	51869998	-
MSTRG.594.5	chr1	51749765	51869998	-
MSTRG.594.6	chr1	51749765	51869998	-
MSTRG.594.9	chr1	51749982	51885836	-
MSTRG.594.15	chr1	51762590	51916071	-
MSTRG.594.26	chr1	51941474	51973179	-
MSTRG.602.1	chr1	51973947	52107189	+
MSTRG.587.8	chr1	52185280	52233274	-
MSTRG.587.11	chr1	52187660	52233274	-
MSTRG.589.1	chr1	52240129	52407696	+
MSTRG.589.2	chr1	52370720	52399671	+
MSTRG.601.3	chr1	52457303	52500104	-
MSTRG.588.1	chr1	52621573	52623251	-
MSTRG.607.4	chr1	53202735	53297023	-
MSTRG.612.1	chr1	53407712	53420351	+
MSTRG.612.3	chr1	53407712	53411491	+
MSTRG.619.1	chr1	54045250	54045507	+
MSTRG.627.1	chr1	54255763	54256024	+
MSTRG.636.1	chr1	54645139	54926572	-
MSTRG.636.2	chr1	54645340	54926572	-
MSTRG.636.3	chr1	54645340	54926572	-
MSTRG.636.19	chr1	54874957	54926572	-
MSTRG.631.1	chr1	55072929	55073279	+
MSTRG.641.2	chr1	55077863	55088243	-
MSTRG.641.3	chr1	55077884	55088243	-
MSTRG.642.1	chr1	55086766	55091307	+
MSTRG.644.1	chr1	55128568	55128804	+
MSTRG.648.2	chr1	55268856	55362726	-
MSTRG.650.2	chr1	55931282	55958637	+
MSTRG.650.3	chr1	55955706	55958637	+
MSTRG.650.4	chr1	55955706	55972328	+
MSTRG.650.5	chr1	55955795	55972328	+
MSTRG.653.1	chr1	56023912	56031940	-
MSTRG.653.2	chr1	56030079	56031940	-
MSTRG.655.5	chr1	56794778	56971926	-
MSTRG.654.1	chr1	57107850	57110729	-
MSTRG.659.1	chr1	57353146	57353386	-
MSTRG.664.15	chr1	57901774	57948394	+
MSTRG.664.16	chr1	57901796	57948394	+
MSTRG.673.9	chr1	58414590	58421082	-
MSTRG.677.1	chr1	58427158	58449240	-
MSTRG.677.2	chr1	58430994	58445506	-
MSTRG.677.3	chr1	58430994	58440842	-
MSTRG.679.2	chr1	58463973	58505109	-
MSTRG.683.1	chr1	58532132	58532421	-
MSTRG.682.5	chr1	58552187	58586323	-
MSTRG.674.5	chr1	58827918	58847503	+
MSTRG.676.2	chr1	58849154	58867211	-
MSTRG.693.1	chr1	59120935	59178286	-
MSTRG.689.1	chr1	59378891	59393602	+
MSTRG.690.1	chr1	59383984	59393057	-
MSTRG.690.2	chr1	59391065	59393057	-
MSTRG.690.3	chr1	59391067	59393057	-
MSTRG.690.4	chr1	59392395	59393057	-
MSTRG.698.5	chr1	59544192	59636417	+
MSTRG.698.6	chr1	59544221	59636417	+
MSTRG.698.16	chr1	59619417	59636417	+
MSTRG.701.3	chr1	59639438	59656221	-
MSTRG.701.4	chr1	59639438	59671108	-
MSTRG.704.1	chr1	59671148	59719044	+
MSTRG.696.1	chr1	59763400	59879112	+
MSTRG.714.7	chr1	59989184	60039572	-
MSTRG.714.9	chr1	59990620	60028236	-
MSTRG.714.12	chr1	60020791	60043069	-
MSTRG.714.13	chr1	60020791	60043069	-
MSTRG.714.14	chr1	60020791	60043069	-
MSTRG.714.16	chr1	60021139	60098645	-
MSTRG.714.18	chr1	60021159	60039572	-
MSTRG.714.20	chr1	60073219	60098645	-
MSTRG.715.1	chr1	60098171	60153953	+
MSTRG.715.2	chr1	60098247	60153953	+
MSTRG.715.6	chr1	60100362	60153953	+
MSTRG.715.9	chr1	60102627	60153953	+
MSTRG.722.1	chr1	60180313	60338328	+
MSTRG.722.2	chr1	60180490	60338328	+
MSTRG.722.4	chr1	60180517	60338328	+
MSTRG.722.5	chr1	60180517	60319832	+
MSTRG.722.7	chr1	60180801	60338328	+
MSTRG.722.9	chr1	60180919	60335260	+
MSTRG.726.1	chr1	60409158	60464879	+
MSTRG.726.2	chr1	60409619	60481976	+
MSTRG.726.3	chr1	60409619	60478002	+
MSTRG.726.6	chr1	60409695	60481976	+
MSTRG.727.2	chr1	60483185	60566890	-
MSTRG.719.1	chr1	60584412	60607033	+
MSTRG.718.1	chr1	60705200	60705706	+
MSTRG.725.1	chr1	61321768	61322015	+
MSTRG.730.3	chr1	61638859	62642284	+
MSTRG.733.1	chr1	61683920	61684201	+
MSTRG.736.1	chr1	61785796	61786100	+
MSTRG.742.2	chr1	62456824	62458894	-
MSTRG.744.8	chr1	62715910	62818695	+
MSTRG.744.9	chr1	62715961	62799420	+
MSTRG.767.1	chr1	63006016	63011487	+
MSTRG.767.2	chr1	63006016	63011487	+
MSTRG.767.3	chr1	63006232	63011487	+
MSTRG.766.2	chr1	63047801	63113787	-
MSTRG.766.3	chr1	63047801	63106869	-
MSTRG.766.4	chr1	63047801	63092456	-
MSTRG.766.6	chr1	63047801	63113120	-
MSTRG.766.7	chr1	63047801	63113787	-
MSTRG.766.8	chr1	63047801	63114667	-
MSTRG.766.9	chr1	63047801	63114210	-
MSTRG.774.1	chr1	63143514	63176764	-
MSTRG.774.2	chr1	63143514	63176764	-
MSTRG.777.1	chr1	63182040	63218201	-
MSTRG.782.1	chr1	63273136	63295046	+
MSTRG.782.2	chr1	63273236	63295046	+
MSTRG.751.1	chr1	63398594	63694971	-
MSTRG.751.3	chr1	63399037	63694971	-
MSTRG.756.1	chr1	63629224	63629805	-
MSTRG.760.4	chr1	64029461	64122282	-
MSTRG.760.5	chr1	64029653	64088484	-
MSTRG.760.7	chr1	64076685	64122282	-
MSTRG.750.1	chr1	64151422	64153186	-
MSTRG.758.1	chr1	64312227	64316320	-
MSTRG.758.2	chr1	64312560	64316320	-
MSTRG.758.3	chr1	64314529	64316320	-
MSTRG.758.4	chr1	64314538	64316320	-
MSTRG.758.5	chr1	64314539	64316320	-
MSTRG.759.2	chr1	64402000	64433011	-
MSTRG.759.3	chr1	64402000	64433011	-
MSTRG.759.4	chr1	64402467	64433011	-
MSTRG.759.5	chr1	64402480	64433011	-
MSTRG.759.6	chr1	64402483	64433011	-
MSTRG.759.7	chr1	64402483	64433011	-
MSTRG.759.9	chr1	64402499	64433011	-
MSTRG.765.10	chr1	64532894	64604548	+
MSTRG.765.9	chr1	64532894	64604548	+
MSTRG.763.3	chr1	64606523	64617751	-
MSTRG.790.1	chr1	64747152	65094945	-
MSTRG.790.2	chr1	65092548	65095107	-
MSTRG.789.1	chr1	65125496	65126028	-
MSTRG.813.2	chr1	65186637	65278695	+
MSTRG.813.5	chr1	65186666	65254312	+
MSTRG.813.6	chr1	65186683	65278695	+
MSTRG.813.7	chr1	65186683	65278695	+
MSTRG.813.18	chr1	65186750	65278695	+
MSTRG.803.1	chr1	65358831	65362006	-
MSTRG.803.2	chr1	65358831	65362006	-
MSTRG.805.1	chr1	65540163	65570653	+
MSTRG.805.2	chr1	65540178	65570653	+
MSTRG.805.3	chr1	65540188	65570653	+
MSTRG.804.1	chr1	65942742	65943127	-
MSTRG.811.1	chr1	66065081	66151379	-
MSTRG.811.2	chr1	66065081	66151379	-
MSTRG.811.3	chr1	66065081	66151379	-
MSTRG.811.4	chr1	66065081	66151379	-
MSTRG.811.5	chr1	66065082	66126708	-
MSTRG.814.1	chr1	66156054	66163432	+
MSTRG.815.1	chr1	66175273	66442583	+
MSTRG.815.7	chr1	66228445	66442583	+
MSTRG.820.1	chr1	66649266	66674028	-
MSTRG.820.2	chr1	66649266	66674028	-
MSTRG.825.5	chr1	66700847	66719805	+
MSTRG.826.6	chr1	66720458	66808794	-
MSTRG.826.7	chr1	66720458	66817636	-
MSTRG.826.9	chr1	66720458	66817036	-
MSTRG.826.10	chr1	66720462	66807988	-
MSTRG.826.11	chr1	66720462	66817636	-
MSTRG.826.13	chr1	66720542	66817636	-
MSTRG.826.14	chr1	66720613	66803233	-
MSTRG.838.1	chr1	66999853	67024753	-
MSTRG.833.1	chr1	67485035	67497074	+
MSTRG.837.1	chr1	67764735	67765900	-
MSTRG.834.2	chr1	69373917	69406025	-
MSTRG.840.2	chr1	69531279	69687245	-
MSTRG.850.1	chr1	70098938	70099892	+
MSTRG.851.1	chr1	70123130	70123361	+
MSTRG.845.8	chr1	70451362	70725132	+
MSTRG.845.10	chr1	70451403	70466366	+
MSTRG.845.9	chr1	70451403	70677561	+
MSTRG.845.11	chr1	70452069	70478011	+
MSTRG.856.1	chr1	70784081	70808141	-
MSTRG.856.2	chr1	70788776	70808141	-
MSTRG.843.1	chr1	71027294	71103146	-
MSTRG.843.3	chr1	71027548	71103146	-
MSTRG.871.10	chr1	71585705	71609412	-
MSTRG.860.1	chr1	71956511	72052114	-
MSTRG.860.3	chr1	71983675	72052114	-
MSTRG.865.1	chr1	72236386	72272208	+
MSTRG.865.2	chr1	72262261	72265447	+
MSTRG.864.2	chr1	72307453	72394952	+
MSTRG.864.3	chr1	72307511	72394952	+
MSTRG.864.4	chr1	72339359	72394952	+
MSTRG.864.5	chr1	72340349	72394952	+
MSTRG.875.1	chr1	72633970	72635661	+
MSTRG.887.1	chr1	74288247	74303774	-
MSTRG.887.7	chr1	74289338	74304122	-
MSTRG.885.9	chr1	74344561	74353694	+
MSTRG.901.2	chr1	74391509	74397285	+
MSTRG.902.2	chr1	74418482	74438036	+
MSTRG.902.3	chr1	74418576	74438036	+
MSTRG.903.1	chr1	74435510	74506283	-
MSTRG.903.2	chr1	74435511	74505806	-
MSTRG.905.1	chr1	74506035	74530842	+
MSTRG.905.3	chr1	74506060	74530842	+
MSTRG.907.6	chr1	74565127	74587980	-
MSTRG.907.8	chr1	74566426	74588246	-
MSTRG.907.9	chr1	74566426	74587980	-
MSTRG.909.3	chr1	74588315	74592443	+
MSTRG.911.8	chr1	74606250	74637245	+
MSTRG.911.9	chr1	74606250	74637245	+
MSTRG.893.1	chr1	74661042	74703730	+
MSTRG.895.2	chr1	74967311	75046649	-
MSTRG.896.1	chr1	74983012	74984718	+
MSTRG.897.3	chr1	75125549	75129717	-
MSTRG.898.2	chr1	75135768	75142057	-
MSTRG.898.6	chr1	75136785	75142711	-
MSTRG.915.1	chr1	75168007	75170753	+
MSTRG.917.7	chr1	75192192	75199387	+
MSTRG.917.10	chr1	75192242	75199387	+
MSTRG.917.11	chr1	75192242	75199387	+
MSTRG.917.9	chr1	75192242	75199387	+
MSTRG.918.8	chr1	75199672	75210757	-
MSTRG.919.3	chr1	75210840	75215606	+
MSTRG.919.7	chr1	75210874	75215606	+
MSTRG.912.1	chr1	75236398	75245692	+
MSTRG.913.3	chr1	75308565	75317334	-
MSTRG.913.6	chr1	75309183	75317334	-
MSTRG.914.2	chr1	75310137	75312753	+
MSTRG.923.3	chr1	75435961	75443179	+
MSTRG.927.5	chr1	75489236	75506501	-
MSTRG.930.5	chr1	75522777	75537335	+
MSTRG.931.1	chr1	75686955	75688768	+
MSTRG.931.3	chr1	75687150	75762362	+
MSTRG.932.1	chr1	75714555	75714970	-
MSTRG.941.1	chr1	76765516	76766181	+
MSTRG.938.1	chr1	77087260	77341252	-
MSTRG.938.2	chr1	77087269	77186902	-
MSTRG.942.4	chr1	77367192	77391779	-
MSTRG.963.3	chr1	78657883	78670759	+
MSTRG.950.1	chr1	78762610	79341945	-
MSTRG.950.2	chr1	78762832	79341945	-
MSTRG.955.1	chr1	78827245	78830805	-
MSTRG.955.2	chr1	78827752	78830558	-
MSTRG.955.3	chr1	78828202	78830558	-
MSTRG.955.4	chr1	78828248	78830805	-
MSTRG.950.3	chr1	79287985	79341945	-
MSTRG.959.1	chr1	79508621	79510324	-
MSTRG.960.1	chr1	79546345	79579173	+
MSTRG.960.2	chr1	79546351	79579173	+
MSTRG.964.2	chr1	79794304	79795042	-
MSTRG.964.3	chr1	79796845	79861244	-
MSTRG.969.1	chr1	79950830	79960147	-
MSTRG.971.1	chr1	79959243	80001042	+
MSTRG.971.2	chr1	79959243	80001042	+
MSTRG.975.1	chr1	80184563	80229614	+
MSTRG.977.2	chr1	80265623	80340785	-
MSTRG.979.1	chr1	80981218	80981820	+
MSTRG.984.1	chr1	82365358	82371858	-
MSTRG.990.3	chr1	82693763	82722059	+
MSTRG.990.4	chr1	82694635	82722059	+
MSTRG.993.1	chr1	82724851	82752477	+
MSTRG.993.2	chr1	82724881	82752477	+
MSTRG.993.5	chr1	82724908	82741976	+
MSTRG.988.2	chr1	82839438	82903174	+
MSTRG.988.13	chr1	82862773	82876020	+
MSTRG.987.2	chr1	83232677	83234729	-
MSTRG.999.1	chr1	84269054	84269357	+
MSTRG.1000.1	chr1	84369839	84696377	-
MSTRG.1002.1	chr1	84685838	84688952	+
MSTRG.1002.2	chr1	84685882	84687091	+
MSTRG.1002.3	chr1	84685882	84688952	+
MSTRG.1006.1	chr1	84721189	84839405	-
MSTRG.1006.5	chr1	84721195	84839405	-
MSTRG.1006.9	chr1	84721199	84850238	-
MSTRG.1006.12	chr1	84724264	84839822	-
MSTRG.1006.13	chr1	84724264	84839405	-
MSTRG.1006.15	chr1	84724264	84839405	-
MSTRG.1006.16	chr1	84724264	84839822	-
MSTRG.1006.19	chr1	84724577	84839405	-
MSTRG.1006.20	chr1	84724577	84839405	-
MSTRG.1006.22	chr1	84726210	84839405	-
MSTRG.1006.32	chr1	84765987	84839405	-
MSTRG.1009.5	chr1	84874862	84900487	+
MSTRG.1009.6	chr1	84878870	84900487	+
MSTRG.1011.1	chr1	85001172	85001547	+
MSTRG.1019.1	chr1	85099512	85114035	+
MSTRG.1019.3	chr1	85100164	85261030	+
MSTRG.1019.4	chr1	85100164	85113894	+
MSTRG.1019.7	chr1	85106634	85289835	+
MSTRG.1020.1	chr1	85111342	85272914	-
MSTRG.1019.13	chr1	85158956	85261030	+
MSTRG.1019.14	chr1	85158956	85261030	+
MSTRG.1019.15	chr1	85158956	85261030	+
MSTRG.1019.16	chr1	85158956	85274570	+
MSTRG.1019.18	chr1	85158956	85260601	+
MSTRG.1010.5	chr1	85241286	85257689	-
MSTRG.1010.7	chr1	85241290	85270566	-
MSTRG.1010.8	chr1	85241290	85270566	-
MSTRG.1010.10	chr1	85243310	85260899	-
MSTRG.1010.11	chr1	85245490	85270566	-
MSTRG.1010.12	chr1	85245640	85260899	-
MSTRG.1019.24	chr1	85271844	85454351	+
MSTRG.1028.1	chr1	85332601	85342086	-
MSTRG.1004.1	chr1	85454794	85455155	+
MSTRG.1005.1	chr1	85482763	85483245	+
MSTRG.1029.2	chr1	85486384	85491942	+
MSTRG.1029.3	chr1	85486385	85496344	+
MSTRG.1029.4	chr1	85486385	85514948	+
MSTRG.1029.6	chr1	85486385	85645037	+
MSTRG.1029.7	chr1	85486385	85630564	+
MSTRG.1029.8	chr1	85486385	85514948	+
MSTRG.1032.1	chr1	85571273	85603983	-
MSTRG.1032.2	chr1	85576899	85603983	-
MSTRG.1032.6	chr1	85576941	85603983	-
MSTRG.1032.7	chr1	85576941	85603983	-
MSTRG.1032.10	chr1	85576945	85604564	-
MSTRG.1032.11	chr1	85576945	85603983	-
MSTRG.1032.9	chr1	85576945	85598779	-
MSTRG.1034.1	chr1	85598247	85598837	+
MSTRG.1029.10	chr1	85599247	85645037	+
MSTRG.1029.14	chr1	85600679	85645037	+
MSTRG.1029.15	chr1	85600680	85645037	+
MSTRG.1029.17	chr1	85600711	85645037	+
MSTRG.1029.18	chr1	85600717	85622784	+
MSTRG.1029.19	chr1	85601001	85645037	+
MSTRG.1032.19	chr1	85607278	85610876	-
MSTRG.1043.1	chr1	85793441	85851576	+
MSTRG.1043.3	chr1	85793444	85851576	+
MSTRG.1048.10	chr1	86133637	86260110	+
MSTRG.1048.13	chr1	86154784	86237540	+
MSTRG.1048.21	chr1	86154810	86269086	+
MSTRG.1046.2	chr1	86350495	86359205	-
MSTRG.1037.1	chr1	86526726	86530712	+
MSTRG.1044.4	chr1	86543176	86549353	-
MSTRG.1044.5	chr1	86543176	86549353	-
MSTRG.1045.1	chr1	86555498	86609375	+
MSTRG.1045.2	chr1	86555916	86582050	+
MSTRG.1045.3	chr1	86555919	86601339	+
MSTRG.1045.4	chr1	86555919	86582050	+
MSTRG.1056.3	chr1	86703743	87050095	+
MSTRG.1056.10	chr1	86726655	86767343	+
MSTRG.1066.2	chr1	87025547	87074092	-
MSTRG.1071.2	chr1	87190637	87212694	+
MSTRG.1072.1	chr1	87213914	87240886	+
MSTRG.1072.8	chr1	87213933	87240886	+
MSTRG.1072.10	chr1	87213979	87240886	+
MSTRG.1073.1	chr1	87246093	87310839	+
MSTRG.1076.3	chr1	87476891	87557499	-
MSTRG.1084.1	chr1	87617560	87720507	+
MSTRG.1084.12	chr1	87669809	87720507	+
MSTRG.1102.1	chr1	87853286	87945180	+
MSTRG.1102.3	chr1	87853287	87944755	+
MSTRG.1110.2	chr1	88258864	88277633	-
MSTRG.1110.4	chr1	88262886	88277633	-
MSTRG.1101.1	chr1	88522004	88523721	-
MSTRG.1108.1	chr1	88614011	88622031	+
MSTRG.1108.2	chr1	88614386	88622031	+
MSTRG.1111.1	chr1	89302719	89358144	-
MSTRG.1114.1	chr1	89452992	89463742	+
MSTRG.1115.1	chr1	89454745	89897630	+
MSTRG.1115.2	chr1	89454781	89576602	+
MSTRG.1119.1	chr1	89579649	89581863	-
MSTRG.1115.8	chr1	89579936	89897630	+
MSTRG.1115.9	chr1	89580236	89897630	+
MSTRG.1115.12	chr1	89581216	89897630	+
MSTRG.1115.14	chr1	89582017	89897630	+
MSTRG.1124.1	chr1	90042132	90090164	-
MSTRG.1123.1	chr1	90684581	90699148	+
MSTRG.1126.1	chr1	90886434	90891958	-
MSTRG.1135.2	chr1	90998774	91117315	+
MSTRG.1135.3	chr1	90998774	91117315	+
MSTRG.1135.11	chr1	91044366	91117315	+
MSTRG.1135.12	chr1	91053404	91117315	+
MSTRG.1135.20	chr1	91111214	91117315	+
MSTRG.1130.1	chr1	91144900	91172772	+
MSTRG.1132.1	chr1	91231319	91234356	-
MSTRG.1136.1	chr1	91238312	91241403	-
MSTRG.1137.3	chr1	91246624	91290953	+
MSTRG.1137.6	chr1	91247050	91290953	+
MSTRG.1142.1	chr1	91365790	91374217	+
MSTRG.1143.5	chr1	91375959	91398815	-
MSTRG.1146.1	chr1	91708016	91714737	+
MSTRG.1146.3	chr1	91708022	91712294	+
MSTRG.1148.1	chr1	91867686	91880486	+
MSTRG.1157.1	chr1	91928769	92180402	-
MSTRG.1157.10	chr1	91928779	92180257	-
MSTRG.1157.11	chr1	91928779	92180402	-
MSTRG.1157.5	chr1	91928779	92180854	-
MSTRG.1157.6	chr1	91928779	92180402	-
MSTRG.1157.7	chr1	91928779	92180854	-
MSTRG.1157.9	chr1	91928779	92195699	-
MSTRG.1160.1	chr1	92180621	92198409	+
MSTRG.1160.2	chr1	92180621	92189891	+
MSTRG.1161.1	chr1	92190050	92191334	+
MSTRG.1149.1	chr1	92352373	92354280	+
MSTRG.1154.1	chr1	92526800	92529450	+
MSTRG.1154.2	chr1	92526818	92531082	+
MSTRG.1154.3	chr1	92526851	92529365	+
MSTRG.1154.4	chr1	92526851	92529365	+
MSTRG.1154.5	chr1	92526910	92529365	+
MSTRG.1154.6	chr1	92526921	92529365	+
MSTRG.1154.7	chr1	92526932	92529365	+
MSTRG.1155.1	chr1	92705001	92706717	+
MSTRG.1167.1	chr1	92713150	92717202	-
MSTRG.1169.2	chr1	92909416	92910764	-
MSTRG.1170.6	chr1	92913448	92921133	+
MSTRG.1170.11	chr1	92917147	92921133	+
MSTRG.1173.2	chr1	92955221	92986391	+
MSTRG.1176.1	chr1	93279806	93296861	-
MSTRG.1179.1	chr1	93308722	93343482	-
MSTRG.1183.1	chr1	93405935	93445579	-
MSTRG.1185.1	chr1	93478964	93510260	+
MSTRG.1188.2	chr1	93621902	93658719	-
MSTRG.1188.4	chr1	93622359	93658719	-
MSTRG.1190.5	chr1	93705413	93754884	-
MSTRG.1193.1	chr1	93763661	93783104	-
MSTRG.1193.2	chr1	93778392	93783104	-
MSTRG.1194.2	chr1	93792576	93802094	-
MSTRG.1194.4	chr1	93792724	93802094	-
MSTRG.1205.2	chr1	93990525	94017147	+
MSTRG.1205.3	chr1	93990525	94017147	+
MSTRG.1205.5	chr1	93990526	93993003	+
MSTRG.1198.1	chr1	94365350	94365884	+
MSTRG.1206.1	chr1	94771192	94773235	+
MSTRG.1206.2	chr1	94771195	94773235	+
MSTRG.1211.1	chr1	95895093	95897403	+
MSTRG.1213.1	chr1	96115150	96128464	+
MSTRG.1215.1	chr1	97179066	97192900	+
MSTRG.1216.1	chr1	97179136	97192510	-
MSTRG.1217.1	chr1	97179417	97191823	-
MSTRG.1220.1	chr1	97690394	97756283	-
MSTRG.1220.3	chr1	97705962	97770411	-
MSTRG.1220.9	chr1	97706050	97769810	-
MSTRG.1220.13	chr1	97720964	97769810	-
MSTRG.1221.8	chr1	97778801	97793709	+
MSTRG.1221.9	chr1	97778801	97793709	+
MSTRG.1221.10	chr1	97778813	97793709	+
MSTRG.1221.11	chr1	97778996	97793709	+
MSTRG.1221.13	chr1	97779009	97793709	+
MSTRG.1221.16	chr1	97780276	97793709	+
MSTRG.1241.3	chr1	97821094	98095664	-
MSTRG.1241.5	chr1	97821094	97975905	-
MSTRG.1222.1	chr1	98395236	99101511	+
MSTRG.1222.2	chr1	98642362	99157063	+
MSTRG.1222.3	chr1	98642390	98644779	+
MSTRG.1229.1	chr1	98820845	98823229	-
MSTRG.1222.4	chr1	99100019	99156080	+
MSTRG.1231.1	chr1	99129538	99132242	+
MSTRG.1234.1	chr1	99790267	99791025	-
MSTRG.1236.1	chr1	99918531	99979232	-
MSTRG.1263.1	chr1	100647997	100860044	+
MSTRG.1247.1	chr1	101648399	102097166	+
MSTRG.1247.2	chr1	101648469	102795956	+
MSTRG.1252.1	chr1	101989496	102195938	-
MSTRG.1247.4	chr1	102072948	102135852	+
MSTRG.1252.2	chr1	102184203	102195938	-
MSTRG.1255.1	chr1	102276220	103205259	+
MSTRG.1260.1	chr1	103178352	103180981	+
MSTRG.1260.3	chr1	103178415	103180981	+
MSTRG.1271.1	chr1	104461272	104658453	-
MSTRG.1271.2	chr1	104560409	104658453	-
MSTRG.1271.3	chr1	104566042	104658112	-
MSTRG.1271.5	chr1	104581438	104658453	-
MSTRG.1271.6	chr1	104581469	104583942	-
MSTRG.1271.7	chr1	104638862	104658453	-
MSTRG.1271.8	chr1	104638862	104658453	-
MSTRG.1271.11	chr1	104638994	104658453	-
MSTRG.1265.1	chr1	104736933	104740188	+
MSTRG.1266.2	chr1	104987949	104995481	+
MSTRG.1287.2	chr1	105389138	105395496	+
MSTRG.1287.3	chr1	105389173	105395496	+
MSTRG.1289.1	chr1	105507887	105508238	+
MSTRG.1286.2	chr1	105518173	105663677	-
MSTRG.1286.5	chr1	105518439	105663677	-
MSTRG.1286.6	chr1	105521137	105663677	-
MSTRG.1286.11	chr1	105564126	105663677	-
MSTRG.1277.1	chr1	105766082	105766518	+
MSTRG.1278.1	chr1	105867848	105935631	-
MSTRG.1283.1	chr1	105990354	106036315	+
MSTRG.1283.2	chr1	105990405	106036315	+
MSTRG.1283.3	chr1	105990406	106036315	+
MSTRG.1283.4	chr1	105990406	106036315	+
MSTRG.1297.2	chr1	106730966	106734527	+
MSTRG.1297.3	chr1	106731003	106741782	+
MSTRG.1295.1	chr1	106920732	106924272	-
MSTRG.1303.4	chr1	106953157	106957080	+
MSTRG.1305.3	chr1	107045605	107065520	-
MSTRG.1306.1	chr1	108373517	108380328	-
MSTRG.1294.1	chr1	108494067	108494417	+
MSTRG.1327.1	chr1	108852877	108988391	-
MSTRG.1308.1	chr1	109130094	109133399	-
MSTRG.1332.1	chr1	109543541	109543760	-
MSTRG.1338.1	chr1	110185049	110188777	-
MSTRG.1338.2	chr1	110187003	110188962	-
MSTRG.1329.2	chr1	110888329	110942173	-
MSTRG.1323.1	chr1	111490985	111666535	+
MSTRG.1309.1	chr1	111702366	112567644	+
MSTRG.1309.2	chr1	112565892	112618379	+
MSTRG.1326.1	chr1	112619367	112627853	+
MSTRG.1319.1	chr1	113542256	113740824	+
MSTRG.1307.1	chr1	114112051	114114653	-
MSTRG.1324.1	chr1	114557364	114557921	+
MSTRG.1328.1	chr1	114795851	114857150	+
MSTRG.1328.2	chr1	114795892	114857150	+
MSTRG.1341.1	chr1	115395635	116225616	+
MSTRG.1344.2	chr1	116088959	116587323	+
MSTRG.1344.3	chr1	116088963	116587323	+
MSTRG.1344.4	chr1	116089206	116587323	+
MSTRG.1347.1	chr1	117088935	117326176	+
MSTRG.1347.2	chr1	117089326	117326176	+
MSTRG.1347.3	chr1	117089326	117095627	+
MSTRG.1348.1	chr1	117471600	117474295	-
MSTRG.1349.2	chr1	117472143	117657431	-
MSTRG.1348.2	chr1	117473940	117474295	-
MSTRG.1348.3	chr1	117473950	117474295	-
MSTRG.1353.1	chr1	117603869	117628313	+
MSTRG.1346.1	chr1	117660528	117663601	+
MSTRG.1359.1	chr1	118204757	118311739	-
MSTRG.1359.4	chr1	118294778	118311232	-
MSTRG.1389.16	chr1	118419724	118612678	+
MSTRG.1389.22	chr1	118459588	118612678	+
MSTRG.1389.30	chr1	118503257	118612678	+
MSTRG.1365.2	chr1	118834158	118916677	-
MSTRG.1365.3	chr1	118834227	118916677	-
MSTRG.1367.1	chr1	119470305	119502960	-
MSTRG.1372.1	chr1	119562131	119563757	+
MSTRG.1371.10	chr1	119636713	119649000	-
MSTRG.1375.2	chr1	119652475	119836901	-
MSTRG.1376.1	chr1	119703734	119705427	+
MSTRG.1376.2	chr1	119703782	119705427	+
MSTRG.1378.1	chr1	119766192	119766557	-
MSTRG.1382.1	chr1	119810803	119812908	-
MSTRG.1384.1	chr1	119819484	119819931	-
MSTRG.1387.1	chr1	120105903	120108690	+
MSTRG.1387.2	chr1	120106242	120188189	+
MSTRG.1387.3	chr1	120106254	120111028	+
MSTRG.1387.9	chr1	120160059	120188189	+
MSTRG.1387.10	chr1	120160091	120188189	+
MSTRG.1385.1	chr1	120364323	120378669	-
MSTRG.1385.2	chr1	120364327	120378669	-
MSTRG.1385.3	chr1	120374200	120378669	-
MSTRG.1397.1	chr1	120506692	120508603	+
MSTRG.1398.1	chr1	120509693	120510129	+
MSTRG.1399.1	chr1	120517567	120518464	+
MSTRG.1408.1	chr1	121488977	121495811	-
MSTRG.1406.2	chr1	121553866	121567790	-
MSTRG.1400.1	chr1	121911578	121916243	+
MSTRG.1400.2	chr1	121911578	121916243	+
MSTRG.1400.4	chr1	121912063	121916243	+
MSTRG.1414.4	chr1	123332214	123419827	-
MSTRG.1414.5	chr1	123333805	123419089	-
MSTRG.1414.6	chr1	123333805	123419827	-
MSTRG.1425.1	chr1	124355381	124355593	-
MSTRG.1428.1	chr1	124584019	124613241	+
MSTRG.1430.1	chr1	124642010	124644656	+
MSTRG.1430.2	chr1	124642026	125488639	+
MSTRG.1432.1	chr1	125000436	125000901	-
MSTRG.1430.3	chr1	125244552	125487080	+
MSTRG.1430.6	chr1	125244585	125488639	+
MSTRG.1430.7	chr1	125244599	125487080	+
MSTRG.1430.8	chr1	125484607	125488639	+
MSTRG.1430.9	chr1	125484612	125488639	+
MSTRG.1430.10	chr1	125484613	125488639	+
MSTRG.1430.11	chr1	125484619	125488639	+
MSTRG.1430.12	chr1	125484624	125488639	+
MSTRG.1393.1	chr1	125560595	125595820	+
MSTRG.1393.3	chr1	125560966	125595820	+
MSTRG.1401.1	chr1	125655980	125782902	-
MSTRG.1402.1	chr1	125656500	125783340	-
MSTRG.1409.2	chr1	125913637	126706801	-
MSTRG.1409.8	chr1	125914743	126619931	-
MSTRG.1413.1	chr1	126627527	126630071	-
MSTRG.1436.1	chr1	127105168	127455199	-
MSTRG.1437.1	chr1	127204919	127488403	+
MSTRG.1437.2	chr1	127204963	127488403	+
MSTRG.1437.3	chr1	127204973	127488403	+
MSTRG.1437.7	chr1	127236484	127488403	+
MSTRG.1437.8	chr1	127236484	127488403	+
MSTRG.1436.3	chr1	127431034	127455199	-
MSTRG.1436.4	chr1	127452834	127455199	-
MSTRG.1443.1	chr1	127591013	127593923	+
MSTRG.1443.2	chr1	127591020	127593684	+
MSTRG.1443.3	chr1	127591020	127593923	+
MSTRG.1443.4	chr1	127591020	127593923	+
MSTRG.1443.5	chr1	127591022	127593923	+
MSTRG.1443.6	chr1	127591024	127593923	+
MSTRG.1443.7	chr1	127591024	127593923	+
MSTRG.1443.8	chr1	127591037	127593684	+
MSTRG.1443.9	chr1	127591037	127593923	+
MSTRG.1446.1	chr1	127774164	127808061	+
MSTRG.1455.1	chr1	128030344	128038982	+
MSTRG.1458.1	chr1	128103270	128237736	+
MSTRG.1458.2	chr1	128103297	128237736	+
MSTRG.1458.4	chr1	128103301	128237736	+
MSTRG.1448.2	chr1	128244135	128279378	+
MSTRG.1448.5	chr1	128244464	128266508	+
MSTRG.1450.1	chr1	128361803	128417368	-
MSTRG.1482.1	chr1	129184532	130915841	-
MSTRG.1482.2	chr1	129839527	130231769	-
MSTRG.1482.3	chr1	130206948	130231769	-
MSTRG.1482.4	chr1	130906079	130915841	-
MSTRG.1482.5	chr1	130906079	130915841	-
MSTRG.1482.7	chr1	130907281	130915841	-
MSTRG.1468.8	chr1	131153221	131173478	+
MSTRG.1471.1	chr1	131564240	131564591	-
MSTRG.1473.1	chr1	131633151	131633407	+
MSTRG.1518.3	chr1	131910680	131936321	+
MSTRG.1521.2	chr1	131962967	131982969	+
MSTRG.1521.7	chr1	132007323	132032612	+
MSTRG.1521.8	chr1	132007607	132032612	+
MSTRG.1521.10	chr1	132007876	132032612	+
MSTRG.1521.11	chr1	132007876	132030831	+
MSTRG.1521.13	chr1	132008099	132032612	+
MSTRG.1521.16	chr1	132008297	132032612	+
MSTRG.1521.21	chr1	132019200	132032612	+
MSTRG.1517.2	chr1	132102379	132108323	+
MSTRG.1517.3	chr1	132102468	132108323	+
MSTRG.1526.1	chr1	132268263	132277699	+
MSTRG.1530.1	chr1	132356276	132386308	-
MSTRG.1530.2	chr1	132356314	132386308	-
MSTRG.1532.1	chr1	132417384	132467235	+
MSTRG.1532.4	chr1	132418377	132467235	+
MSTRG.1532.6	chr1	132424938	132467235	+
MSTRG.1532.7	chr1	132425245	132467235	+
MSTRG.1534.1	chr1	132477185	132508639	+
MSTRG.1534.7	chr1	132477642	132506229	+
MSTRG.1535.1	chr1	132509427	132535478	-
MSTRG.1535.4	chr1	132511750	132546581	-
MSTRG.1536.1	chr1	132545463	132547443	+
MSTRG.1537.2	chr1	132564788	132646112	-
MSTRG.1541.3	chr1	132986220	133030631	-
MSTRG.1541.4	chr1	132986220	133030631	-
MSTRG.1541.5	chr1	132986220	133030631	-
MSTRG.1541.6	chr1	132986220	133030631	-
MSTRG.1541.8	chr1	132989845	133030631	-
MSTRG.1543.1	chr1	133031509	133108687	+
MSTRG.1543.2	chr1	133031509	133108687	+
MSTRG.1543.3	chr1	133033452	133108687	+
MSTRG.1543.4	chr1	133033452	133108687	+
MSTRG.1543.6	chr1	133045958	133108687	+
MSTRG.1545.10	chr1	133269639	133303435	+
MSTRG.1550.1	chr1	133337743	133360325	+
MSTRG.1549.1	chr1	133382301	133393271	-
MSTRG.1551.5	chr1	133619940	133661380	-
MSTRG.1551.6	chr1	133619940	133661380	-
MSTRG.1551.8	chr1	133624591	133661380	-
MSTRG.1551.9	chr1	133624591	133661380	-
MSTRG.1552.3	chr1	133702674	133801041	-
MSTRG.1556.1	chr1	133867167	133998243	+
MSTRG.1559.3	chr1	133915386	133928824	-
MSTRG.1556.2	chr1	133982534	133998243	+
MSTRG.1556.3	chr1	133982579	133989695	+
MSTRG.1554.1	chr1	134256863	134258443	-
MSTRG.1554.2	chr1	134256988	134258443	-
MSTRG.1561.6	chr1	134298381	134332928	-
MSTRG.1563.2	chr1	134347682	134361979	-
MSTRG.1581.1	chr1	134649805	134651706	-
MSTRG.1587.1	chr1	134951242	134953243	+
MSTRG.1593.1	chr1	135242383	135251716	-
MSTRG.1588.3	chr1	135304503	135313778	-
MSTRG.1602.4	chr1	135437403	135554062	-
MSTRG.1602.6	chr1	135438025	135510451	-
MSTRG.1602.13	chr1	135458680	135585744	-
MSTRG.1601.1	chr1	135934438	135937251	+
MSTRG.1608.1	chr1	136018249	136018892	-
MSTRG.1614.2	chr1	136181662	136196976	-
MSTRG.1612.3	chr1	136268190	136328066	-
MSTRG.1612.4	chr1	136268252	136346104	-
MSTRG.1609.1	chr1	136375699	136401221	+
MSTRG.1623.1	chr1	136415271	136440158	+
MSTRG.1626.1	chr1	136466232	136532138	+
MSTRG.1626.2	chr1	136466266	136532138	+
MSTRG.1626.3	chr1	136466287	136532138	+
MSTRG.1626.4	chr1	136466343	136532138	+
MSTRG.1626.6	chr1	136466820	136532138	+
MSTRG.1617.1	chr1	136566317	136633132	+
MSTRG.1621.1	chr1	136625848	136641461	-
MSTRG.1624.1	chr1	136820904	136846849	+
MSTRG.1625.2	chr1	136844276	136953391	-
MSTRG.1636.1	chr1	138609961	138611923	+
MSTRG.1631.1	chr1	138773999	138777182	-
MSTRG.1637.1	chr1	138805203	138808160	-
MSTRG.1640.2	chr1	138963435	139178960	+
MSTRG.1651.5	chr1	139483526	139494091	+
MSTRG.1651.7	chr1	139484879	139494091	+
MSTRG.1654.3	chr1	140042699	140070639	-
MSTRG.1658.1	chr1	140047781	140048257	-
MSTRG.1659.1	chr1	140794958	140797220	-
MSTRG.1661.2	chr1	140836033	140841191	+
MSTRG.1661.5	chr1	140836082	141253343	+
MSTRG.1660.1	chr1	141749619	141753307	-
MSTRG.1660.2	chr1	141751658	141753114	-
MSTRG.1663.1	chr1	142360415	142589368	-
MSTRG.1665.1	chr1	143006046	143295177	-
MSTRG.1667.1	chr1	143555669	143598640	+
MSTRG.1670.1	chr1	143664835	143665156	-
MSTRG.1668.6	chr1	143676011	143702893	-
MSTRG.1674.1	chr1	143719751	143720122	+
MSTRG.1680.1	chr1	144252679	144253800	+
MSTRG.1681.1	chr1	144255456	144255702	+
MSTRG.1679.1	chr1	145528159	145531203	+
MSTRG.1678.1	chr1	145535704	145537296	+
MSTRG.1695.1	chr1	146724995	146725280	+
MSTRG.1683.1	chr1	147372692	147377888	+
MSTRG.1685.1	chr1	147415701	147418599	-
MSTRG.1685.2	chr1	147415745	147418599	-
MSTRG.1685.4	chr1	147417299	147418599	-
MSTRG.1684.1	chr1	147559254	147561036	-
MSTRG.1686.1	chr1	148447655	148761858	-
MSTRG.1689.1	chr1	149154088	149179843	-
MSTRG.1699.1	chr1	149636130	149638890	-
MSTRG.1700.1	chr1	150188087	150188297	-
MSTRG.1701.1	chr1	150270656	150271853	+
MSTRG.1705.2	chr1	150392976	150449935	+
MSTRG.1702.1	chr1	151220186	151223686	-
MSTRG.1703.1	chr1	151240185	151252343	-
MSTRG.1703.2	chr1	151240186	151252343	-
MSTRG.1703.3	chr1	151240186	151252343	-
MSTRG.1703.4	chr1	151240186	151252343	-
MSTRG.1703.5	chr1	151240187	151252343	-
MSTRG.1703.6	chr1	151240188	151252343	-
MSTRG.1703.7	chr1	151241466	151252343	-
MSTRG.1703.10	chr1	151241477	151252343	-
MSTRG.1703.11	chr1	151241480	151252703	-
MSTRG.1712.5	chr1	151428648	151458161	+
MSTRG.1712.9	chr1	151442120	151458161	+
MSTRG.1709.1	chr1	151733133	151744477	-
MSTRG.1709.2	chr1	151733161	151744477	-
MSTRG.1724.1	chr1	151755098	151822326	+
MSTRG.1719.1	chr1	152088758	152088974	-
MSTRG.1721.1	chr1	152314085	152315789	+
MSTRG.1722.1	chr1	152331178	152334657	-
MSTRG.1722.2	chr1	152331178	152334657	-
MSTRG.1728.1	chr1	152428333	152437783	-
MSTRG.1728.2	chr1	152428336	152437783	-
MSTRG.1728.3	chr1	152432360	152437783	-
MSTRG.1729.2	chr1	152516951	152766351	-
MSTRG.1734.1	chr1	152766454	152775597	+
MSTRG.1736.3	chr1	152836784	152903290	-
MSTRG.1736.4	chr1	152836995	152903290	-
MSTRG.1736.5	chr1	152836995	152903290	-
MSTRG.1736.6	chr1	152836995	152903290	-
MSTRG.1739.1	chr1	153122756	153218001	-
MSTRG.1739.3	chr1	153122756	153218001	-
MSTRG.1740.1	chr1	153216790	153218586	+
MSTRG.1741.4	chr1	153219152	153321653	-
MSTRG.1741.5	chr1	153228761	153320440	-
MSTRG.1744.1	chr1	153382578	153402597	+
MSTRG.1744.2	chr1	153399085	153401145	+
MSTRG.1747.2	chr1	153425115	153452879	+
MSTRG.1747.3	chr1	153425162	153449023	+
MSTRG.1747.6	chr1	153425212	153445031	+
MSTRG.1747.7	chr1	153425212	153443480	+
MSTRG.1749.3	chr1	153456485	153487660	-
MSTRG.1750.1	chr1	153469813	153470459	-
MSTRG.1751.1	chr1	153481420	153481671	-
MSTRG.1759.1	chr1	153849542	153855480	-
MSTRG.1759.5	chr1	153850138	153853699	-
MSTRG.1763.3	chr1	153900162	153909723	+
MSTRG.1764.1	chr1	153908620	153912639	-
MSTRG.1758.1	chr1	154095952	154096290	+
MSTRG.1756.3	chr1	154111574	154113431	-
MSTRG.1766.1	chr1	155158715	155205659	+
MSTRG.1768.1	chr1	155207791	155257011	-
MSTRG.1771.1	chr1	155660615	155660848	+
MSTRG.1777.3	chr1	155862825	155973488	-
MSTRG.1784.3	chr1	156004620	156035757	-
MSTRG.1784.5	chr1	156006681	156035757	-
MSTRG.1786.2	chr1	156035726	156068861	+
MSTRG.1786.5	chr1	156036133	156053736	+
MSTRG.1786.7	chr1	156040890	156068861	+
MSTRG.1787.1	chr1	156255296	156304058	-
MSTRG.1787.2	chr1	156255296	156302976	-
MSTRG.1791.3	chr1	156330418	156421159	-
MSTRG.1791.7	chr1	156338928	156421159	-
MSTRG.1793.2	chr1	156429793	156476342	-
MSTRG.1793.4	chr1	156430725	156474331	-
MSTRG.1798.1	chr1	156558549	156651056	+
MSTRG.1798.2	chr1	156558786	156651056	+
MSTRG.1798.3	chr1	156558786	156651056	+
MSTRG.1795.4	chr1	156654579	156660763	-
MSTRG.1800.2	chr1	156678549	156718865	-
MSTRG.1800.3	chr1	156678551	156718865	-
MSTRG.1796.1	chr1	156722706	156723109	-
MSTRG.1802.1	chr1	156804166	156940114	-
MSTRG.1802.8	chr1	156808830	156933839	-
MSTRG.1808.2	chr1	157135189	157412835	-
MSTRG.1808.4	chr1	157143549	157412835	-
MSTRG.1814.2	chr1	157449545	157489060	+
MSTRG.1814.3	chr1	157449560	157489060	+
MSTRG.1818.1	chr1	158767481	158809594	+
MSTRG.1818.3	chr1	158805887	158814794	+
MSTRG.1817.4	chr1	158827334	158838683	-
MSTRG.1819.1	chr1	158839408	158839743	+
MSTRG.1828.2	chr1	159232020	159348389	+
MSTRG.1828.3	chr1	159232033	159348389	+
MSTRG.1828.7	chr1	159232690	159348389	+
MSTRG.1832.3	chr1	160195303	160202170	+
MSTRG.1840.3	chr1	160219177	160792946	-
MSTRG.1840.6	chr1	160222950	160792946	-
MSTRG.1840.15	chr1	160256933	160820768	-
MSTRG.1840.24	chr1	160816944	160820768	-
MSTRG.1839.1	chr1	160936540	160936761	+
MSTRG.1866.4	chr1	160978652	161005863	+
MSTRG.1869.2	chr1	161002925	161034849	-
MSTRG.1872.1	chr1	161039485	161040254	-
MSTRG.1857.4	chr1	161088398	161131511	-
MSTRG.1863.2	chr1	161240204	161324993	-
MSTRG.1863.3	chr1	161241015	161324993	-
MSTRG.1875.2	chr1	161816652	161877513	-
MSTRG.1875.4	chr1	161816843	161877513	-
MSTRG.1875.5	chr1	161816846	161853838	-
MSTRG.1877.1	chr1	161890458	161894203	+
MSTRG.1877.2	chr1	161890458	161912805	+
MSTRG.1877.3	chr1	161890458	161900477	+
MSTRG.1879.7	chr1	161969325	161973435	+
MSTRG.1880.8	chr1	162006144	162424659	-
MSTRG.1880.13	chr1	162372381	162424659	-
MSTRG.1904.1	chr1	162643168	162646780	-
MSTRG.1906.1	chr1	162657381	162672694	+
MSTRG.1907.8	chr1	162670635	162724869	-
MSTRG.1907.18	chr1	162671788	162740634	-
MSTRG.1907.24	chr1	162673402	162724869	-
MSTRG.1907.27	chr1	162673402	162740634	-
MSTRG.1907.30	chr1	162673521	162740634	-
MSTRG.1887.2	chr1	162950177	162954464	+
MSTRG.1894.1	chr1	163652268	163678019	-
MSTRG.1894.2	chr1	163663300	163678219	-
MSTRG.1894.4	chr1	163664681	163678219	-
MSTRG.1894.5	chr1	163667361	163678219	-
MSTRG.1894.6	chr1	163675719	163678219	-
MSTRG.1894.7	chr1	163676092	163678219	-
MSTRG.1894.8	chr1	163676096	163678019	-
MSTRG.1894.10	chr1	163676139	163677540	-
MSTRG.1894.9	chr1	163676139	163678219	-
MSTRG.1898.6	chr1	163942398	163954723	+
MSTRG.1898.7	chr1	163942721	163943770	+
MSTRG.1899.2	chr1	163953565	163994796	-
MSTRG.1899.3	chr1	163953567	163994796	-
MSTRG.1897.2	chr1	164275597	164287847	+
MSTRG.1932.6	chr1	164307982	164437247	+
MSTRG.1932.10	chr1	164329180	164437247	+
MSTRG.1934.1	chr1	164437109	164458889	-
MSTRG.1901.1	chr1	164554071	164572247	-
MSTRG.1913.1	chr1	164656602	164659662	-
MSTRG.1902.1	chr1	164973839	165000735	-
MSTRG.1909.2	chr1	165137944	165149694	-
MSTRG.1923.2	chr1	165174337	165194694	-
MSTRG.1923.4	chr1	165174355	165194694	-
MSTRG.1924.2	chr1	165329504	165460567	-
MSTRG.1924.4	chr1	165329505	165460567	-
MSTRG.1928.2	chr1	165460643	165481214	+
MSTRG.1916.1	chr1	165592240	165608604	-
MSTRG.1916.2	chr1	165592240	165634538	-
MSTRG.1957.2	chr1	165865145	166002887	-
MSTRG.1957.4	chr1	165865150	166002920	-
MSTRG.1957.7	chr1	165865154	166002887	-
MSTRG.1910.1	chr1	166357199	166359294	+
MSTRG.1949.4	chr1	166394869	166409863	-
MSTRG.1949.5	chr1	166394869	166409863	-
MSTRG.1945.1	chr1	166438052	166455507	-
MSTRG.1930.1	chr1	166953820	166957167	+
MSTRG.1941.1	chr1	167557682	167559020	+
MSTRG.1950.1	chr1	167954868	167967160	-
MSTRG.1964.2	chr1	169949541	169969241	-
MSTRG.1967.1	chr1	170704674	170867771	-
MSTRG.1972.1	chr1	170872273	170885764	-
MSTRG.1972.2	chr1	170872273	170885066	-
MSTRG.1972.3	chr1	170872273	170885066	-
MSTRG.1972.4	chr1	170872803	170885066	-
MSTRG.1974.1	chr1	170886196	170887389	+
MSTRG.1975.1	chr1	170888349	170888957	+
MSTRG.1970.1	chr1	171010649	171010868	-
MSTRG.1981.2	chr1	171129086	171150603	-
MSTRG.1981.3	chr1	171129086	171150603	-
MSTRG.1985.1	chr1	171270280	171276896	+
MSTRG.1985.9	chr1	171270408	171276896	+
MSTRG.1986.2	chr1	171276992	171281186	-
MSTRG.1989.1	chr1	171292274	171296915	+
MSTRG.2005.1	chr1	171328858	171342331	+
MSTRG.2005.5	chr1	171329569	171342331	+
MSTRG.2005.8	chr1	171329612	171342331	+
MSTRG.2005.9	chr1	171329618	171342331	+
MSTRG.2005.10	chr1	171329719	171342331	+
MSTRG.2006.6	chr1	171342394	171345646	-
MSTRG.2007.1	chr1	171344965	171359254	+
MSTRG.2007.2	chr1	171345020	171359254	+
MSTRG.2007.5	chr1	171345730	171359254	+
MSTRG.2007.8	chr1	171345976	171359254	+
MSTRG.1997.1	chr1	171411279	171418871	+
MSTRG.1993.1	chr1	171505891	171506169	-
MSTRG.2010.1	chr1	171624732	171626901	+
MSTRG.2000.1	chr1	171879948	171880214	-
MSTRG.2025.1	chr1	172145438	172145844	+
MSTRG.2034.6	chr1	172148178	172196389	+
MSTRG.2034.8	chr1	172148948	172196389	+
MSTRG.2034.10	chr1	172149980	172196389	+
MSTRG.2036.1	chr1	172206839	172207199	+
MSTRG.2038.8	chr1	172526934	172545870	+
MSTRG.2039.1	chr1	172529396	172532316	-
MSTRG.2048.3	chr1	174552132	174822729	+
MSTRG.2051.1	chr1	175139708	175139985	+
MSTRG.2052.1	chr1	175141183	175141451	+
MSTRG.2057.5	chr1	175758815	175815734	+
MSTRG.2059.3	chr1	175880794	175913489	+
MSTRG.2059.10	chr1	175889926	175913489	+
MSTRG.2059.11	chr1	175889927	175913489	+
MSTRG.2059.12	chr1	175889927	175913489	+
MSTRG.2059.13	chr1	175890154	175901368	+
MSTRG.2062.1	chr1	176575430	176581263	-
MSTRG.2062.2	chr1	176578903	176581263	-
MSTRG.2064.1	chr1	176709283	176717802	-
MSTRG.2069.3	chr1	176733662	176814227	-
MSTRG.2069.7	chr1	176733674	176836168	-
MSTRG.2069.12	chr1	176735585	176814227	-
MSTRG.2075.7	chr1	176814821	177020752	+
MSTRG.2075.8	chr1	176814821	176946487	+
MSTRG.2069.20	chr1	176830923	176836168	-
MSTRG.2082.1	chr1	177007244	177259391	-
MSTRG.2082.3	chr1	177018059	177248776	-
MSTRG.2082.5	chr1	177020663	177258305	-
MSTRG.2082.6	chr1	177022115	177259391	-
MSTRG.2089.1	chr1	177260400	177286848	-
MSTRG.2068.3	chr1	177442138	177450764	+
MSTRG.2068.4	chr1	177442200	177450764	+
MSTRG.2068.5	chr1	177442351	177450764	+
MSTRG.2068.10	chr1	177442544	177450764	+
MSTRG.2068.8	chr1	177442544	177450764	+
MSTRG.2068.9	chr1	177442544	177450764	+
MSTRG.2068.13	chr1	177442860	177450764	+
MSTRG.2065.1	chr1	177585840	177588362	+
MSTRG.2066.1	chr1	177758110	177762025	+
MSTRG.2095.2	chr1	177763175	177796668	-
MSTRG.2099.1	chr1	177924551	177925822	-
MSTRG.2099.2	chr1	177924552	177925822	-
MSTRG.2099.3	chr1	177924553	177925822	-
MSTRG.2100.1	chr1	177983418	178172705	+
MSTRG.2100.3	chr1	177983679	178048291	+
MSTRG.2101.1	chr1	177984130	178196393	+
MSTRG.2107.1	chr1	178300065	178300403	+
MSTRG.2093.3	chr1	178323134	178337797	-
MSTRG.2114.1	chr1	178470562	178472949	-
MSTRG.2114.2	chr1	178470565	178472949	-
MSTRG.2123.1	chr1	178514220	178518222	+
MSTRG.2116.1	chr1	179058429	179058639	-
MSTRG.2117.1	chr1	179194338	179194676	-
MSTRG.2118.1	chr1	179228595	179228827	-
MSTRG.2115.5	chr1	179348203	179518041	-
MSTRG.2119.1	chr1	179381654	179382622	-
MSTRG.2120.1	chr1	179382138	179394278	+
MSTRG.2120.3	chr1	179390980	179395754	+
MSTRG.2120.4	chr1	179391002	179394220	+
MSTRG.2120.5	chr1	179391005	179394220	+
MSTRG.2120.6	chr1	179391011	179394220	+
MSTRG.2121.1	chr1	179397132	179397402	-
MSTRG.2115.8	chr1	179399895	179518041	-
MSTRG.2122.1	chr1	179459341	179464793	-
MSTRG.2126.4	chr1	179590612	179627478	+
MSTRG.2127.1	chr1	179610307	179661595	-
MSTRG.2149.1	chr1	179959488	180165783	+
MSTRG.2149.3	chr1	179959986	180165783	+
MSTRG.2149.5	chr1	179960001	180164275	+
MSTRG.2149.13	chr1	179975899	180164275	+
MSTRG.2149.15	chr1	179976973	180165783	+
MSTRG.2149.16	chr1	179976983	180165783	+
MSTRG.2149.19	chr1	179984258	180165783	+
MSTRG.2149.20	chr1	179984930	180145000	+
MSTRG.2149.22	chr1	179990218	180165783	+
MSTRG.2149.23	chr1	179990218	180165783	+
MSTRG.2152.3	chr1	180167019	180178643	-
MSTRG.2152.8	chr1	180170130	180195967	-
MSTRG.2131.1	chr1	180227004	180256300	-
MSTRG.2131.2	chr1	180227004	180255095	-
MSTRG.2131.7	chr1	180227006	180255095	-
MSTRG.2137.5	chr1	180641353	180690694	+
MSTRG.2134.1	chr1	180700604	180700820	+
MSTRG.2141.1	chr1	180851059	180868113	+
MSTRG.2146.2	chr1	181087907	181144209	-
MSTRG.2153.5	chr1	181173236	181212001	-
MSTRG.2153.7	chr1	181173928	181212001	-
MSTRG.2153.11	chr1	181178197	181212001	-
MSTRG.2154.1	chr1	181214689	181214961	+
MSTRG.2156.6	chr1	181676555	181718935	+
MSTRG.2158.1	chr1	181713256	181715007	-
MSTRG.2158.2	chr1	181713428	181715007	-
MSTRG.2160.2	chr1	181815335	181845329	-
MSTRG.2160.3	chr1	181815335	181842379	-
MSTRG.2160.7	chr1	181816661	181842379	-
MSTRG.2160.9	chr1	181816714	181842379	-
MSTRG.2160.10	chr1	181816957	181843046	-
MSTRG.2169.6	chr1	181896427	182020026	-
MSTRG.2169.7	chr1	181896427	182019529	-
MSTRG.2169.19	chr1	181919451	181964064	-
MSTRG.2174.1	chr1	182020101	182029824	+
MSTRG.2163.1	chr1	182241743	182272258	+
MSTRG.2164.2	chr1	182315188	182341629	-
MSTRG.2177.1	chr1	182762023	182896591	+
MSTRG.2178.1	chr1	183073270	183074167	+
MSTRG.2188.1	chr1	183086263	183221522	-
MSTRG.2188.2	chr1	183086263	183269602	-
MSTRG.2188.3	chr1	183086263	183269602	-
MSTRG.2188.4	chr1	183086266	183269602	-
MSTRG.2189.1	chr1	183103606	183104146	-
MSTRG.2190.1	chr1	183158993	184025551	-
MSTRG.2188.10	chr1	183259296	183269602	-
MSTRG.2192.1	chr1	183276352	183296828	-
MSTRG.2192.2	chr1	183276352	183296828	-
MSTRG.2192.3	chr1	183276352	183293303	-
MSTRG.2192.7	chr1	183277155	183297181	-
MSTRG.2194.2	chr1	183326827	183345514	-
MSTRG.2194.3	chr1	183326827	183354042	-
MSTRG.2194.4	chr1	183326827	183345514	-
MSTRG.2194.5	chr1	183326827	183354042	-
MSTRG.2197.1	chr1	183388875	183410198	+
MSTRG.2197.2	chr1	183388897	183410198	+
MSTRG.2197.3	chr1	183388979	183406638	+
MSTRG.2197.7	chr1	183390317	183406638	+
MSTRG.2197.8	chr1	183407863	183410198	+
MSTRG.2199.1	chr1	183417289	183436808	+
MSTRG.2201.1	chr1	183555051	183558644	-
MSTRG.2180.1	chr1	184462139	184462475	-
MSTRG.2181.1	chr1	184527297	184571661	-
MSTRG.2186.1	chr1	184896789	184999983	-
MSTRG.2225.4	chr1	185221038	185286455	+
MSTRG.2227.2	chr1	185243765	185247889	-
MSTRG.2230.1	chr1	185329436	185358216	+
MSTRG.2230.6	chr1	185332173	185358216	+
MSTRG.2209.1	chr1	185518192	185519277	+
MSTRG.2210.1	chr1	185549624	185557217	-
MSTRG.2211.1	chr1	185558319	185628644	+
MSTRG.2216.1	chr1	185831361	185832528	+
MSTRG.2216.2	chr1	185831436	185837653	+
MSTRG.2216.3	chr1	185831436	185959888	+
MSTRG.2216.4	chr1	185831436	185848546	+
MSTRG.2214.2	chr1	186087786	186116450	-
MSTRG.2213.1	chr1	186538018	186539514	+
MSTRG.2222.1	chr1	186622787	186668155	-
MSTRG.2222.2	chr1	186622787	186650384	-
MSTRG.2239.10	chr1	187215544	187240533	+
MSTRG.2239.8	chr1	187215544	187285937	+
MSTRG.2239.9	chr1	187215544	187285937	+
MSTRG.2239.12	chr1	187215546	187332605	+
MSTRG.2241.4	chr1	187663620	188214891	+
MSTRG.2241.5	chr1	187663682	187712096	+
MSTRG.2252.1	chr1	188625163	188645459	-
MSTRG.2253.1	chr1	188645461	188645957	-
MSTRG.2250.5	chr1	188722421	188966391	+
MSTRG.2256.1	chr1	188988264	188989335	-
MSTRG.2247.1	chr1	189012478	189016254	-
MSTRG.2248.1	chr1	189070097	189070309	+
MSTRG.2259.1	chr1	189239746	189241557	+
MSTRG.2263.1	chr1	189443677	189471737	-
MSTRG.2263.2	chr1	189451430	189454176	-
MSTRG.2263.3	chr1	189451491	189454614	-
MSTRG.2263.4	chr1	189451537	189454614	-
MSTRG.2263.5	chr1	189452062	189454176	-
MSTRG.2263.6	chr1	189452103	189471737	-
MSTRG.2263.8	chr1	189453729	189454176	-
MSTRG.2264.1	chr1	189635780	189688086	-
MSTRG.2271.1	chr1	189880492	189922685	-
MSTRG.2273.1	chr1	189923617	189932549	+
MSTRG.2276.1	chr1	190118035	190167872	-
MSTRG.2277.1	chr1	190168600	190218776	+
MSTRG.2274.2	chr1	190430387	190444855	-
MSTRG.2274.3	chr1	190430387	190444855	-
MSTRG.2274.4	chr1	190430416	190444855	-
MSTRG.2280.1	chr1	190766994	190767491	-
MSTRG.2279.2	chr1	190772879	190911770	-
MSTRG.2279.6	chr1	190772929	190911770	-
MSTRG.2281.1	chr1	190902520	190903303	-
MSTRG.2281.2	chr1	190902520	190903303	-
MSTRG.2282.1	chr1	190924426	190946962	+
MSTRG.2282.3	chr1	190928474	190946962	+
MSTRG.2282.8	chr1	190928822	190946962	+
MSTRG.2282.10	chr1	190928831	190946962	+
MSTRG.2283.6	chr1	190955096	190985371	-
MSTRG.2283.8	chr1	190983388	190985371	-
MSTRG.2293.4	chr1	191063038	191075124	+
MSTRG.2285.6	chr1	191104595	191108945	+
MSTRG.2286.1	chr1	191127370	191131381	-
MSTRG.2288.1	chr1	191146932	191148648	+
MSTRG.2298.1	chr1	191385299	191388470	+
MSTRG.2298.2	chr1	191385605	191388470	+
MSTRG.2298.3	chr1	191385605	191388470	+
MSTRG.2299.1	chr1	191388912	191389338	+
MSTRG.2301.1	chr1	191653667	191657014	+
MSTRG.2307.2	chr1	191712739	191784255	+
MSTRG.2307.3	chr1	191714301	191784255	+
MSTRG.2309.1	chr1	191769399	191800161	-
MSTRG.2309.2	chr1	191774778	191800161	-
MSTRG.2309.3	chr1	191788608	191800161	-
MSTRG.2309.5	chr1	191794185	191799882	-
MSTRG.2306.2	chr1	191821510	191833273	+
MSTRG.2311.1	chr1	191870446	191906290	-
MSTRG.2312.1	chr1	191871551	191871775	-
MSTRG.2314.3	chr1	191907704	191913389	+
MSTRG.2324.1	chr1	192145268	192164110	-
MSTRG.2325.1	chr1	192190120	192510159	+
MSTRG.2325.4	chr1	192190824	192437004	+
MSTRG.2325.5	chr1	192190824	192510159	+
MSTRG.2325.6	chr1	192190824	192442418	+
MSTRG.2326.1	chr1	192366110	192366811	+
MSTRG.2325.7	chr1	192413074	192510159	+
MSTRG.2327.2	chr1	192512825	192687793	-
MSTRG.2327.3	chr1	192512825	192687793	-
MSTRG.2327.5	chr1	192512825	192687793	-
MSTRG.2327.8	chr1	192512880	192687793	-
MSTRG.2328.1	chr1	192629772	192633234	+
MSTRG.2328.2	chr1	192631511	192635041	+
MSTRG.2335.5	chr1	193104434	193130272	-
MSTRG.2339.1	chr1	193346343	193370298	-
MSTRG.2341.1	chr1	193604615	193604865	+
MSTRG.2344.1	chr1	194656337	194656606	-
MSTRG.2348.1	chr1	195096173	195131586	-
MSTRG.2348.7	chr1	195103822	195131586	-
MSTRG.2351.1	chr10	3239585	3240009	+
MSTRG.2354.1	chr10	3337391	3337751	-
MSTRG.2355.3	chr10	3428350	3464975	+
MSTRG.2357.1	chr10	3463760	3704631	-
MSTRG.2359.1	chr10	3584446	3586383	-
MSTRG.2360.6	chr10	3871907	3967584	+
MSTRG.2369.1	chr10	4253856	4359796	+
MSTRG.2369.2	chr10	4253856	4359796	+
MSTRG.2369.3	chr10	4253856	4359796	+
MSTRG.2369.4	chr10	4257304	4315515	+
MSTRG.2369.6	chr10	4289500	4359796	+
MSTRG.2369.7	chr10	4317967	4359796	+
MSTRG.2369.8	chr10	4318191	4359796	+
MSTRG.2372.2	chr10	4403171	4432388	-
MSTRG.2372.3	chr10	4403171	4432388	-
MSTRG.2372.7	chr10	4407737	4432388	-
MSTRG.2370.1	chr10	4465834	4564395	+
MSTRG.2375.10	chr10	4935357	5005631	+
MSTRG.2375.11	chr10	4935375	5005631	+
MSTRG.2375.12	chr10	4935375	5005631	+
MSTRG.2375.13	chr10	4935375	5005631	+
MSTRG.2375.14	chr10	4935482	4946374	+
MSTRG.2375.15	chr10	4936120	5005631	+
MSTRG.2408.2	chr10	5021079	5327046	-
MSTRG.2408.3	chr10	5021120	5327046	-
MSTRG.2408.4	chr10	5021120	5327046	-
MSTRG.2408.5	chr10	5021125	5188675	-
MSTRG.2408.11	chr10	5229073	5316887	-
MSTRG.2377.1	chr10	5811887	5824261	-
MSTRG.2379.1	chr10	5928073	6017552	+
MSTRG.2380.1	chr10	6356278	6364083	+
MSTRG.2393.1	chr10	6885795	7052650	-
MSTRG.2393.2	chr10	6885795	7052650	-
MSTRG.2393.3	chr10	6885795	7052650	-
MSTRG.2393.4	chr10	6885795	6967286	-
MSTRG.2393.5	chr10	6885795	6967286	-
MSTRG.2393.6	chr10	6885796	7052650	-
MSTRG.2393.10	chr10	6911543	7052650	-
MSTRG.2386.1	chr10	7303010	7356563	-
MSTRG.2386.2	chr10	7344335	7356563	-
MSTRG.2386.3	chr10	7344483	7356563	-
MSTRG.2386.5	chr10	7345028	7356563	-
MSTRG.2386.6	chr10	7347245	7356563	-
MSTRG.2385.1	chr10	7388770	7389053	-
MSTRG.2387.1	chr10	7487951	7584780	-
MSTRG.2387.2	chr10	7488007	7584780	-
MSTRG.2399.1	chr10	7679162	7679439	+
MSTRG.2400.4	chr10	7705009	7705459	+
MSTRG.2401.1	chr10	8151184	8152917	-
MSTRG.2413.1	chr10	8722173	8886347	-
MSTRG.2413.3	chr10	8723192	9565432	-
MSTRG.2413.4	chr10	8723192	8803458	-
MSTRG.2413.5	chr10	8723194	8836464	-
MSTRG.2413.7	chr10	8723196	8803458	-
MSTRG.2413.8	chr10	8723196	8886347	-
MSTRG.2413.9	chr10	8723200	8886347	-
MSTRG.2413.13	chr10	9521989	9565432	-
MSTRG.2431.1	chr10	9622936	9684797	-
MSTRG.2431.4	chr10	9675369	9684797	-
MSTRG.2431.5	chr10	9683140	9684797	-
MSTRG.2433.1	chr10	9683908	9696002	+
MSTRG.2433.4	chr10	9684754	9691906	+
MSTRG.2449.1	chr10	10161082	10161368	+
MSTRG.2438.1	chr10	10478516	10483589	+
MSTRG.2434.2	chr10	10545008	10594691	-
MSTRG.2434.3	chr10	10545008	10557844	-
MSTRG.2434.5	chr10	10592109	10594016	-
MSTRG.2434.6	chr10	10592114	10594904	-
MSTRG.2434.7	chr10	10592118	10594691	-
MSTRG.2434.9	chr10	10592139	10594691	-
MSTRG.2455.1	chr10	10604867	10631473	+
MSTRG.2455.2	chr10	10604867	10617394	+
MSTRG.2455.3	chr10	10604871	10631473	+
MSTRG.2455.5	chr10	10604871	10716771	+
MSTRG.2455.6	chr10	10604872	10617394	+
MSTRG.2465.3	chr10	11354632	11459658	+
MSTRG.2467.1	chr10	12125135	12135152	-
MSTRG.2491.1	chr10	13042930	13060430	-
MSTRG.2477.2	chr10	13178142	13192428	-
MSTRG.2479.2	chr10	13207717	13308068	-
MSTRG.2479.4	chr10	13207719	13324289	-
MSTRG.2479.5	chr10	13207726	13335607	-
MSTRG.2482.1	chr10	13647049	13692472	-
MSTRG.2482.2	chr10	13647049	13692472	-
MSTRG.2482.4	chr10	13647062	13692245	-
MSTRG.2482.8	chr10	13652601	13692472	-
MSTRG.2489.1	chr10	14314470	14361730	-
MSTRG.2489.2	chr10	14321510	14361730	-
MSTRG.2489.3	chr10	14347336	14361730	-
MSTRG.2489.5	chr10	14352456	14361730	-
MSTRG.2489.6	chr10	14352459	14361730	-
MSTRG.2497.1	chr10	14386986	14402364	+
MSTRG.2497.2	chr10	14386986	14421494	+
MSTRG.2497.3	chr10	14386998	14421494	+
MSTRG.2497.4	chr10	14397049	14421494	+
MSTRG.2507.1	chr10	14559587	14663708	+
MSTRG.2507.2	chr10	14560631	14647226	+
MSTRG.2507.3	chr10	14560631	14659865	+
MSTRG.2507.4	chr10	14560631	14659865	+
MSTRG.2507.5	chr10	14560631	14652918	+
MSTRG.2507.6	chr10	14561026	14655525	+
MSTRG.2507.7	chr10	14645775	14659865	+
MSTRG.2507.8	chr10	14645777	14659865	+
MSTRG.2507.10	chr10	14648071	14659865	+
MSTRG.2507.9	chr10	14648071	14655525	+
MSTRG.2507.11	chr10	14648072	14659865	+
MSTRG.2507.13	chr10	14648076	14659865	+
MSTRG.2507.14	chr10	14648076	14654415	+
MSTRG.2510.1	chr10	14664129	14674255	+
MSTRG.2519.1	chr10	15063880	15064549	+
MSTRG.2496.1	chr10	15107714	15110499	-
MSTRG.2494.1	chr10	15783209	15797633	-
MSTRG.2521.1	chr10	16924640	16927822	-
MSTRG.2506.1	chr10	17408395	17503699	+
MSTRG.2501.4	chr10	17723283	17725674	+
MSTRG.2504.1	chr10	17813777	17854344	-
MSTRG.2523.1	chr10	17948242	17949940	+
MSTRG.2524.1	chr10	18055155	18125155	+
MSTRG.2524.2	chr10	18055162	18125155	+
MSTRG.2524.3	chr10	18055234	18125155	+
MSTRG.2524.4	chr10	18055274	18125155	+
MSTRG.2526.4	chr10	18213775	18235257	-
MSTRG.2527.1	chr10	18228582	18232910	+
MSTRG.2527.2	chr10	18228824	18232210	+
MSTRG.2527.3	chr10	18229373	18232910	+
MSTRG.2529.1	chr10	18317830	18533892	+
MSTRG.2529.7	chr10	18460636	18533892	+
MSTRG.2539.3	chr10	18774810	18857073	+
MSTRG.2539.4	chr10	18774821	18837979	+
MSTRG.2536.2	chr10	19289480	19311039	+
MSTRG.2536.3	chr10	19289480	19308937	+
MSTRG.2536.4	chr10	19289484	19311039	+
MSTRG.2536.5	chr10	19289489	19308937	+
MSTRG.2550.5	chr10	19996785	20105437	+
MSTRG.2550.6	chr10	20070706	20143827	+
MSTRG.2551.2	chr10	20148139	20252468	+
MSTRG.2551.5	chr10	20148995	20281590	+
MSTRG.2557.2	chr10	20312426	20345046	+
MSTRG.2555.4	chr10	20352387	20352823	+
MSTRG.2564.1	chr10	21366581	21374879	-
MSTRG.2564.2	chr10	21367957	21374879	-
MSTRG.2561.1	chr10	21754018	21757722	+
MSTRG.2568.1	chr10	22054982	22058663	-
MSTRG.2574.1	chr10	22149747	22151808	-
MSTRG.2577.3	chr10	22703885	22808022	-
MSTRG.2575.1	chr10	23014690	23021697	-
MSTRG.2575.2	chr10	23015378	23021697	-
MSTRG.2581.3	chr10	23585873	23661604	-
MSTRG.2581.4	chr10	23586042	23661604	-
MSTRG.2581.5	chr10	23608913	23661604	-
MSTRG.2581.8	chr10	23638002	23661604	-
MSTRG.2581.9	chr10	23640480	23661604	-
MSTRG.2581.10	chr10	23641971	23661604	-
MSTRG.2582.1	chr10	23657803	23658627	+
MSTRG.2583.1	chr10	23658454	23661721	-
MSTRG.2585.1	chr10	23776917	23787275	-
MSTRG.2584.1	chr10	23830525	23832147	-
MSTRG.2587.1	chr10	24170054	24171946	-
MSTRG.2589.1	chr10	25030854	25037380	-
MSTRG.2589.2	chr10	25030870	25112698	-
MSTRG.2590.1	chr10	25043108	25050057	-
MSTRG.2594.3	chr10	25169090	25297391	-
MSTRG.2594.6	chr10	25169090	25296138	-
MSTRG.2594.10	chr10	25169092	25298497	-
MSTRG.2594.9	chr10	25169092	25275197	-
MSTRG.2594.14	chr10	25170152	25293592	-
MSTRG.2594.15	chr10	25219102	25299615	-
MSTRG.2598.2	chr10	25298635	25312633	+
MSTRG.2598.3	chr10	25298644	25306432	+
MSTRG.2593.1	chr10	25340481	25340991	+
MSTRG.2600.3	chr10	25359860	25523519	+
MSTRG.2600.4	chr10	25359860	25523519	+
MSTRG.2600.6	chr10	25359878	25523519	+
MSTRG.2600.9	chr10	25382107	25523519	+
MSTRG.2600.22	chr10	25436348	25523519	+
MSTRG.2600.30	chr10	25492429	25523519	+
MSTRG.2603.1	chr10	26168338	26643976	+
MSTRG.2603.2	chr10	26168511	26170660	+
MSTRG.2609.1	chr10	26556316	26565792	-
MSTRG.2611.2	chr10	26695574	26918648	+
MSTRG.2611.3	chr10	26695574	26918648	+
MSTRG.2614.1	chr10	26744137	26747449	-
MSTRG.2614.2	chr10	26744199	26747381	-
MSTRG.2614.3	chr10	26744630	26747381	-
MSTRG.2614.4	chr10	26745312	26747449	-
MSTRG.2615.1	chr10	26796307	26796517	-
MSTRG.2602.1	chr10	26929284	26935091	-
MSTRG.2643.2	chr10	26951187	26983044	+
MSTRG.2645.5	chr10	26981285	27620157	-
MSTRG.2645.8	chr10	26981305	27392445	-
MSTRG.2645.10	chr10	26981495	27620157	-
MSTRG.2645.9	chr10	26981495	27620157	-
MSTRG.2645.13	chr10	27089057	27620157	-
MSTRG.2645.14	chr10	27089436	27616871	-
MSTRG.2645.15	chr10	27089436	27620157	-
MSTRG.2617.2	chr10	27745877	27812540	-
MSTRG.2620.1	chr10	27810384	27810793	-
MSTRG.2616.1	chr10	27825648	27826071	-
MSTRG.2626.1	chr10	28880908	28906105	-
MSTRG.2636.1	chr10	29334235	29362442	-
MSTRG.2632.1	chr10	29797262	29801180	+
MSTRG.2633.1	chr10	30017560	30026934	+
MSTRG.2651.1	chr10	30603195	30618546	-
MSTRG.2651.3	chr10	30603230	30618546	-
MSTRG.2661.5	chr10	31313510	31328204	+
MSTRG.2672.1	chr10	31641779	31657177	-
MSTRG.2681.1	chr10	31714964	31717946	+
MSTRG.2686.1	chr10	32309532	32338546	+
MSTRG.2667.1	chr10	33707957	33709776	-
MSTRG.2673.4	chr10	33919168	33951269	-
MSTRG.2677.1	chr10	34037409	34108851	+
MSTRG.2677.2	chr10	34037451	34068154	+
MSTRG.2677.3	chr10	34037487	34104980	+
MSTRG.2677.4	chr10	34037506	34052227	+
MSTRG.2674.1	chr10	34151390	34187148	-
MSTRG.2674.2	chr10	34151392	34188126	-
MSTRG.2697.1	chr10	34289104	34289505	-
MSTRG.2700.2	chr10	34297481	34301320	+
MSTRG.2693.2	chr10	34772628	34775913	-
MSTRG.2693.3	chr10	34772876	34775913	-
MSTRG.2694.1	chr10	35175181	35207275	-
MSTRG.2703.6	chr10	36595299	36834397	+
MSTRG.2706.1	chr10	36777503	36779985	-
MSTRG.2706.2	chr10	36777582	36779985	-
MSTRG.2711.6	chr10	37141089	37168670	+
MSTRG.2708.1	chr10	37193497	37196415	-
MSTRG.2709.1	chr10	37397554	37397968	-
MSTRG.2712.1	chr10	37675191	37725703	-
MSTRG.2713.1	chr10	37700860	37701092	-
MSTRG.2712.2	chr10	37716941	37725703	-
MSTRG.2714.1	chr10	37800029	37801656	+
MSTRG.2715.1	chr10	38899607	38901487	-
MSTRG.2716.1	chr10	38932927	39110188	+
MSTRG.2716.7	chr10	39042123	39110188	+
MSTRG.2716.8	chr10	39042249	39110188	+
MSTRG.2716.9	chr10	39042284	39048127	+
MSTRG.2719.10	chr10	39118868	39124542	-
MSTRG.2719.9	chr10	39118868	39124542	-
MSTRG.2720.2	chr10	39133989	39164013	+
MSTRG.2718.1	chr10	39225178	39229876	+
MSTRG.2735.3	chr10	39621445	39732007	-
MSTRG.2735.9	chr10	39630959	39633327	-
MSTRG.2735.12	chr10	39651754	39732007	-
MSTRG.2737.1	chr10	39731664	39875211	+
MSTRG.2737.4	chr10	39732364	39875211	+
MSTRG.2737.6	chr10	39732366	39875211	+
MSTRG.2737.8	chr10	39732385	39875211	+
MSTRG.2722.3	chr10	39890063	39899238	-
MSTRG.2722.4	chr10	39890063	39899238	-
MSTRG.2726.1	chr10	40185634	40204165	+
MSTRG.2729.7	chr10	40257686	40257916	-
MSTRG.2743.1	chr10	40362716	40363067	+
MSTRG.2744.1	chr10	40363399	40363651	+
MSTRG.2745.1	chr10	40423755	40423981	+
MSTRG.2750.5	chr10	40831645	40883311	-
MSTRG.2752.2	chr10	40883527	40938570	+
MSTRG.2752.3	chr10	40883531	40938570	+
MSTRG.2747.1	chr10	41149631	41186825	-
MSTRG.2754.2	chr10	41322140	41386245	+
MSTRG.2754.3	chr10	41322140	41434534	+
MSTRG.2754.4	chr10	41322141	41367863	+
MSTRG.2754.5	chr10	41381326	41386245	+
MSTRG.2753.2	chr10	41450417	41465574	+
MSTRG.2760.1	chr10	41531419	41531628	.
MSTRG.2766.2	chr10	41717360	41752266	-
MSTRG.2769.1	chr10	41812014	41812225	+
MSTRG.2774.1	chr10	42181841	42277623	-
MSTRG.2775.1	chr10	42276867	42279070	+
MSTRG.2777.1	chr10	42561963	42568834	-
MSTRG.2782.1	chr10	43002456	43081791	-
MSTRG.2782.2	chr10	43002496	43081791	-
MSTRG.2788.1	chr10	43239145	43239453	+
MSTRG.2787.6	chr10	43289380	43353597	+
MSTRG.2787.7	chr10	43295703	43440602	+
MSTRG.2787.8	chr10	43295703	43440602	+
MSTRG.2786.4	chr10	43487219	43515396	+
MSTRG.2796.2	chr10	43525159	43541001	-
MSTRG.2796.6	chr10	43525174	43541001	-
MSTRG.2798.1	chr10	43773203	43773902	-
MSTRG.2799.3	chr10	43825904	43833392	+
MSTRG.2799.4	chr10	43826137	43833392	+
MSTRG.2800.1	chr10	43827661	43836655	-
MSTRG.2800.2	chr10	43834270	43836655	-
MSTRG.2800.3	chr10	43835648	43836655	-
MSTRG.2808.2	chr10	43902658	43957201	+
MSTRG.2811.1	chr10	43960318	43960655	+
MSTRG.2813.1	chr10	44005830	44031519	+
MSTRG.2803.3	chr10	44215316	44219875	+
MSTRG.2804.1	chr10	44222256	44228563	+
MSTRG.2801.1	chr10	44228901	44229157	-
MSTRG.2805.1	chr10	44268333	44364291	+
MSTRG.2815.1	chr10	44549510	44592219	-
MSTRG.2817.1	chr10	45059513	45167198	+
MSTRG.2817.2	chr10	45059514	45167198	+
MSTRG.2822.1	chr10	45277647	45277927	-
MSTRG.2825.1	chr10	45376620	45486447	-
MSTRG.2825.2	chr10	45376620	45486447	-
MSTRG.2825.3	chr10	45376620	45486447	-
MSTRG.2825.6	chr10	45380549	45470304	-
MSTRG.2831.1	chr10	45567497	46604907	+
MSTRG.2831.3	chr10	45567501	45712345	+
MSTRG.2833.1	chr10	45625996	45628451	+
MSTRG.2839.1	chr10	45980648	45982640	-
MSTRG.2831.11	chr10	46597012	46604907	+
MSTRG.2826.1	chr10	46983136	46986066	-
MSTRG.2829.1	chr10	48533053	48536660	-
MSTRG.2829.2	chr10	48533608	48536660	-
MSTRG.2828.1	chr10	48944892	48947912	+
MSTRG.2852.1	chr10	49712195	49714041	+
MSTRG.2856.1	chr10	49853994	50335160	+
MSTRG.2862.1	chr10	50278548	50281990	-
MSTRG.2866.2	chr10	50592696	50851763	+
MSTRG.2866.3	chr10	50592700	50851763	+
MSTRG.2844.1	chr10	51787417	51789157	+
MSTRG.2871.1	chr10	52044838	52070710	-
MSTRG.2871.2	chr10	52045558	52070710	-
MSTRG.2882.1	chr10	52441051	52637596	-
MSTRG.2882.2	chr10	52441232	52638122	-
MSTRG.2896.2	chr10	53536319	53630439	-
MSTRG.2907.1	chr10	53633130	53751266	-
MSTRG.2907.4	chr10	53633165	53751266	-
MSTRG.2908.1	chr10	54721239	54777141	+
MSTRG.2909.1	chr10	55079955	55082739	+
MSTRG.2916.5	chr10	57486457	57513573	+
MSTRG.2919.1	chr10	57631810	57713508	+
MSTRG.2926.1	chr10	58446643	58494957	+
MSTRG.2926.2	chr10	58446845	58494957	+
MSTRG.2927.2	chr10	58497969	58576244	+
MSTRG.2931.1	chr10	58812350	59116632	+
MSTRG.2931.6	chr10	59080034	59138916	+
MSTRG.2934.3	chr10	59164121	59221847	-
MSTRG.2930.4	chr10	59331244	59373388	+
MSTRG.2938.2	chr10	59447034	59455189	-
MSTRG.2946.6	chr10	59879874	59899302	+
MSTRG.2950.3	chr10	60003143	60100705	+
MSTRG.2950.4	chr10	60003205	60100705	+
MSTRG.2950.6	chr10	60003371	60100705	+
MSTRG.2951.6	chr10	60277664	60302597	+
MSTRG.2956.1	chr10	61098642	61147703	-
MSTRG.2956.5	chr10	61100825	61147703	-
MSTRG.2963.1	chr10	61513735	61515140	-
MSTRG.2974.5	chr10	61680367	61693297	+
MSTRG.2971.1	chr10	61706158	61709864	-
MSTRG.2976.2	chr10	61739271	61753461	-
MSTRG.2980.1	chr10	61995474	61998951	-
MSTRG.2980.2	chr10	61995497	61998951	-
MSTRG.2981.1	chr10	61999347	62025615	+
MSTRG.2982.1	chr10	62025872	62062500	-
MSTRG.2984.2	chr10	62108210	62143920	-
MSTRG.2984.3	chr10	62108210	62143332	-
MSTRG.2984.5	chr10	62108210	62143332	-
MSTRG.2986.1	chr10	62452639	62453399	-
MSTRG.2992.2	chr10	62494428	62508271	-
MSTRG.2996.3	chr10	62580663	62602467	-
MSTRG.2999.1	chr10	62615894	62651589	-
MSTRG.2999.2	chr10	62615894	62638259	-
MSTRG.2999.4	chr10	62615907	62651589	-
MSTRG.2999.5	chr10	62615925	62638259	-
MSTRG.2999.6	chr10	62616015	62638259	-
MSTRG.2999.7	chr10	62616015	62638259	-
MSTRG.2999.8	chr10	62616015	62638259	-
MSTRG.2999.12	chr10	62633119	62651589	-
MSTRG.2998.1	chr10	62731780	62732882	-
MSTRG.3004.3	chr10	62744462	62792295	-
MSTRG.3004.4	chr10	62744462	62792295	-
MSTRG.3004.7	chr10	62753273	62765640	-
MSTRG.3004.9	chr10	62753301	62792129	-
MSTRG.3006.1	chr10	62979970	63013380	+
MSTRG.3006.2	chr10	62980223	63013955	+
MSTRG.3006.10	chr10	62981303	63013380	+
MSTRG.3006.12	chr10	62989163	63002256	+
MSTRG.3008.4	chr10	63015173	63024217	-
MSTRG.3008.6	chr10	63015431	63024217	-
MSTRG.3008.8	chr10	63015454	63024217	-
MSTRG.3008.13	chr10	63018112	63024217	-
MSTRG.3009.1	chr10	63024315	63053952	+
MSTRG.3016.5	chr10	63319058	63361181	-
MSTRG.3016.7	chr10	63319058	63357473	-
MSTRG.3025.1	chr10	63852939	63853352	+
MSTRG.3028.1	chr10	64088874	64089826	+
MSTRG.3030.3	chr10	64537889	64541234	-
MSTRG.3024.6	chr10	64621928	65007294	+
MSTRG.3024.7	chr10	64621947	64624496	+
MSTRG.3024.8	chr10	64621962	65007294	+
MSTRG.3018.1	chr10	65065313	65079660	+
MSTRG.3020.1	chr10	65261704	65263202	-
MSTRG.3022.1	chr10	65476096	65476906	+
MSTRG.3023.1	chr10	65477281	65477764	+
MSTRG.3032.2	chr10	65597635	65607071	-
MSTRG.3031.1	chr10	65955336	65955741	-
MSTRG.3034.1	chr10	66307823	66310109	+
MSTRG.3034.2	chr10	66307860	66310109	+
MSTRG.3036.1	chr10	66969708	66977724	-
MSTRG.3037.1	chr10	66974809	66978205	+
MSTRG.3046.5	chr10	67096492	67256854	+
MSTRG.3046.6	chr10	67096492	67256854	+
MSTRG.3047.1	chr10	67100895	67101592	+
MSTRG.3046.10	chr10	67126182	67256854	+
MSTRG.3039.1	chr10	67451640	67452027	-
MSTRG.3042.1	chr10	67552339	67558183	+
MSTRG.3043.1	chr10	67925784	67927144	-
MSTRG.3049.2	chr10	67979581	68029149	+
MSTRG.3049.3	chr10	67979586	68029955	+
MSTRG.3049.8	chr10	67979715	68029955	+
MSTRG.3058.1	chr10	68411751	68412808	+
MSTRG.3060.2	chr10	69181632	69291791	+
MSTRG.3060.12	chr10	69242032	69291791	+
MSTRG.3062.2	chr10	69338259	69369280	-
MSTRG.3062.9	chr10	69352537	69352835	-
MSTRG.3063.1	chr10	69356669	69357035	+
MSTRG.3100.1	chr10	69605256	69611613	+
MSTRG.3097.27	chr10	69914776	70027438	+
MSTRG.3101.1	chr10	69985235	70062586	-
MSTRG.3101.2	chr10	69985595	70060222	-
MSTRG.3101.3	chr10	69985712	70022064	-
MSTRG.3102.1	chr10	70060143	70088136	+
MSTRG.3103.1	chr10	70096504	70188188	+
MSTRG.3076.4	chr10	70356278	70558930	+
MSTRG.3076.17	chr10	70450444	70558930	+
MSTRG.3081.1	chr10	70604484	70632718	+
MSTRG.3081.2	chr10	70604485	70644180	+
MSTRG.3071.2	chr10	70922873	71115171	-
MSTRG.3074.1	chr10	71111421	71116982	+
MSTRG.3074.2	chr10	71111441	71115103	+
MSTRG.3074.3	chr10	71112708	71114242	+
MSTRG.3064.1	chr10	71223901	71224152	-
MSTRG.3086.3	chr10	71347836	71385885	+
MSTRG.3086.5	chr10	71347836	71385885	+
MSTRG.3086.13	chr10	71425871	71433527	+
MSTRG.3086.14	chr10	71427514	71433527	+
MSTRG.3085.1	chr10	71452303	71461972	+
MSTRG.3088.1	chr10	71571280	71573612	-
MSTRG.3084.1	chr10	72297171	72297375	+
MSTRG.3083.1	chr10	72311163	72311563	+
MSTRG.3094.1	chr10	72726121	72748091	+
MSTRG.3094.2	chr10	72726121	72765963	+
MSTRG.3094.3	chr10	72726157	72765963	+
MSTRG.3114.1	chr10	73101080	73106307	+
MSTRG.3115.1	chr10	73109999	73110286	+
MSTRG.3117.1	chr10	73121794	73122318	+
MSTRG.3118.1	chr10	73139579	73140945	+
MSTRG.3119.1	chr10	73155060	73155607	+
MSTRG.3124.1	chr10	73307285	73307536	+
MSTRG.3127.1	chr10	73491179	73492148	+
MSTRG.3128.1	chr10	73639711	73708207	-
MSTRG.3113.29	chr10	73821916	74649737	+
MSTRG.3113.30	chr10	73821916	74505282	+
MSTRG.3113.31	chr10	73821943	74649737	+
MSTRG.3113.32	chr10	73821943	74505282	+
MSTRG.3113.36	chr10	73822093	74456607	+
MSTRG.3131.1	chr10	74621380	74705189	-
MSTRG.3104.1	chr10	74926346	74927034	-
MSTRG.3108.6	chr10	75037273	75054748	+
MSTRG.3109.1	chr10	75060592	75181240	+
MSTRG.3110.1	chr10	75067876	75068622	+
MSTRG.3111.2	chr10	75212045	75312743	+
MSTRG.3111.4	chr10	75212091	75312743	+
MSTRG.3111.5	chr10	75212095	75312743	+
MSTRG.3140.1	chr10	75380489	75380978	+
MSTRG.3143.1	chr10	75480839	75504764	+
MSTRG.3143.2	chr10	75480839	75504764	+
MSTRG.3143.3	chr10	75481384	75504764	+
MSTRG.3143.4	chr10	75481384	75504764	+
MSTRG.3151.1	chr10	75646110	75764375	-
MSTRG.3151.6	chr10	75684375	75764375	-
MSTRG.3151.8	chr10	75690729	75715693	-
MSTRG.3152.1	chr10	75764546	75764748	+
MSTRG.3166.2	chr10	75831542	75837424	-
MSTRG.3166.3	chr10	75831845	75835529	-
MSTRG.3136.1	chr10	75893359	75895941	+
MSTRG.3156.3	chr10	76007627	76009591	+
MSTRG.3167.1	chr10	76032051	76043593	+
MSTRG.3167.2	chr10	76032051	76043593	+
MSTRG.3167.3	chr10	76032051	76043593	+
MSTRG.3167.7	chr10	76032351	76043593	+
MSTRG.3150.1	chr10	76085215	76085727	+
MSTRG.3134.1	chr10	76180697	76201565	-
MSTRG.3175.2	chr10	76351165	76442786	-
MSTRG.3175.3	chr10	76351230	76442786	-
MSTRG.3175.4	chr10	76351231	76416912	-
MSTRG.3175.7	chr10	76351244	76442786	-
MSTRG.3175.10	chr10	76351254	76415194	-
MSTRG.3175.8	chr10	76351254	76414775	-
MSTRG.3175.11	chr10	76351263	76416912	-
MSTRG.3175.12	chr10	76351263	76442786	-
MSTRG.3175.13	chr10	76351263	76414154	-
MSTRG.3175.20	chr10	76356248	76414775	-
MSTRG.3177.1	chr10	76761652	76933364	-
MSTRG.3177.2	chr10	76761840	76933364	-
MSTRG.3177.6	chr10	76761859	76933364	-
MSTRG.3178.1	chr10	76896029	76897965	+
MSTRG.3178.2	chr10	76896029	76897965	+
MSTRG.3178.3	chr10	76896080	76897965	+
MSTRG.3178.4	chr10	76896080	76897965	+
MSTRG.3178.5	chr10	76896082	76897965	+
MSTRG.3178.6	chr10	76896082	76897965	+
MSTRG.3180.1	chr10	77033501	77033706	+
MSTRG.3181.5	chr10	77055662	77166548	-
MSTRG.3184.2	chr10	77259318	77267307	+
MSTRG.3184.3	chr10	77259318	77269580	+
MSTRG.3184.7	chr10	77262492	77269580	+
MSTRG.3184.8	chr10	77262497	77269580	+
MSTRG.3185.7	chr10	77290738	77418270	-
MSTRG.3186.1	chr10	77486661	77517221	-
MSTRG.3199.1	chr10	77729721	77730221	-
MSTRG.3219.1	chr10	78041878	78063622	+
MSTRG.3219.2	chr10	78041878	78057407	+
MSTRG.3219.3	chr10	78041893	78063622	+
MSTRG.3219.5	chr10	78042102	78063622	+
MSTRG.3219.6	chr10	78042102	78057407	+
MSTRG.3217.3	chr10	78069386	78083919	+
MSTRG.3221.1	chr10	78157324	78169782	-
MSTRG.3221.2	chr10	78159311	78169782	-
MSTRG.3226.1	chr10	78248873	78352847	-
MSTRG.3226.12	chr10	78273614	78352624	-
MSTRG.3246.1	chr10	79196906	79258931	-
MSTRG.3248.1	chr10	79257747	79257988	-
MSTRG.3253.1	chr10	79539696	79555199	-
MSTRG.3253.2	chr10	79540242	79554910	-
MSTRG.3253.4	chr10	79540245	79544770	-
MSTRG.3255.3	chr10	79669883	79676127	+
MSTRG.3258.4	chr10	79736129	79739931	-
MSTRG.3258.11	chr10	79736207	79739931	-
MSTRG.3258.12	chr10	79736207	79746320	-
MSTRG.3260.3	chr10	79759004	79767011	-
MSTRG.3267.1	chr10	79849701	79850472	-
MSTRG.3269.7	chr10	79854665	79864771	+
MSTRG.3269.11	chr10	79854668	79860194	+
MSTRG.3271.1	chr10	79861279	79861582	+
MSTRG.3265.1	chr10	79894150	79894856	+
MSTRG.3266.1	chr10	79894707	79908817	-
MSTRG.3266.2	chr10	79894707	79908505	-
MSTRG.3266.3	chr10	79894708	79908923	-
MSTRG.3274.2	chr10	79910053	79917006	-
MSTRG.3281.3	chr10	79977118	79984330	-
MSTRG.3279.1	chr10	79987724	79988054	+
MSTRG.3283.2	chr10	79996498	80015572	+
MSTRG.3286.1	chr10	80056859	80102721	-
MSTRG.3286.3	chr10	80057020	80102721	-
MSTRG.3289.1	chr10	80130451	80141363	-
MSTRG.3290.2	chr10	80141453	80145818	+
MSTRG.3287.8	chr10	80150953	80158368	+
MSTRG.3287.9	chr10	80150956	80158368	+
MSTRG.3287.10	chr10	80151060	80158368	+
MSTRG.3292.2	chr10	80173259	80175146	+
MSTRG.3292.3	chr10	80173378	80175146	+
MSTRG.3296.3	chr10	80226460	80244062	+
MSTRG.3296.4	chr10	80226465	80244062	+
MSTRG.3296.5	chr10	80226507	80244062	+
MSTRG.3294.2	chr10	80249384	80256794	+
MSTRG.3294.6	chr10	80249485	80256794	+
MSTRG.3299.1	chr10	80292376	80294114	+
MSTRG.3307.2	chr10	80392539	80399550	-
[truncated: 19,152 more rows]
