# Supplementary material for: Newly Evolved Endogenous Retroviruses Prime the Ovarian Reserve for Activation
Source: Research Square preprint supplement (doi:10.21203/rs.3.rs-8081066/v1), 2025-12-03
Supplement: Supplementary file 3 [file be0a885f509d9ffbfbb4468b.xlsx]

## Sheet: Supplemental Table 1
Supplemental Table 1: Sequencing summary of total RNA-seq
Samples	No. of oocytes	Total reads	Uniquely mapped reads number	Uniquely mapped reads %
E18.5 rep1	45000	106995089	88335669	83.28
E18.5 rep2	45000	112035389	94489621	85.1
E18.5 rep3	45000	116354042	86213116	75.2
P1 rep1	20000	120823483	100507620	84.06
P1 rep2	20000	116944882	98086342	84.64
P1 rep3	20000	111922301	94404755	85.21
P6 rep1	10000	142841807	124352485	87.5
P6 rep2	10000	132392740	107844580	82.18
P6 rep3	10000	127185838	109000982	86.1
P7 GO rep1	1000	82498931	66769146	81.21
P7 GO rep2	1000	87057884	69749397	80.48
P7 GO rep3	1000	96440304	77517496	80.69
